# Supplementary material for: EDIACARAN FOSSILS FROM THE SOUTHWESTERN GREAT BASIN
Source: Royal Society of Chemistry journal article supplement (doi:10.1039/d3em00267e), 2000-01-01
Supplement: d3em00267e1.xlsx [file d3em00267e1.xlsx]

## Sheet: Ta
Name	Status	LogBT.Eq2	nAcid	ALogP	ALogp2	AMR	apol	naAromAtom	nAromBond	nAtom	nHeavyAtom	nH	nB	nC	nN	nO	nS	nP	nF	nCl	nBr	nI	nX	ATS0m	ATS1m	ATS2m	ATS3m	ATS4m	ATS5m	ATS6m	ATS7m	ATS8m	ATS0v	ATS1v	ATS2v	ATS3v	ATS4v	ATS5v	ATS6v	ATS7v	ATS8v	ATS0e	ATS1e	ATS2e	ATS3e	ATS4e	ATS5e	ATS6e	ATS7e
[ID_2]_Tramadol	Training	-0.0210438	0	-0.9385	0.880782	48.7166	47.5338	6	6	44	19	25	0	16	1	2	0	0	0	0	0	0	0	3041.76	3407.6	4841.64	5538.53	5362.04	5209.34	4002.67	2550.98	1463.87	8229.46	10636.1	15971.1	19481	19771.1	19123.2	16872.4	12264.2	7487.27	325.515	342.275	627.063	842.637	1042.05	1000.24	982.878	855.968
[ID_4]_oxazepam	Training	-0.0492458	0	-0.3188	0.101633	25.4206	39.7187	12	12	31	20	11	0	15	2	2	0	0	0	1	0	0	1	4336.17	3786.24	5706.94	6641.96	5906.77	6268.84	5517.86	3959.71	1064.17	8118.06	9905.86	14425	16780.9	15506	15277.9	13746.8	8933.76	3386.02	246.193	259.609	418.491	571.18	549.62	524.926	554.565	463.036
[ID_6]_carbamazepine-10___11-epoxide	Training	-0.0480314	0	-0.8826	0.778983	18.3575	38.2055	12	12	31	19	12	0	15	2	2	0	0	0	0	0	0	0	3080.48	3562.72	5030.84	6203.38	6286.66	5500.09	2847.27	762.771	83.8192	7645.17	9866.28	14204.9	17608.5	17785.6	16222.5	10078.8	4428.39	1030.34	240.836	266.026	429.294	573.711	625.372	655.962	556.76	332.832
[ID_7]_4-hydroxy-1H-benzotriazole	Training	-0.0695604	0	-0.8807	0.775632	5.8646	17.996	9	10	15	10	5	0	6	3	1	0	0	0	0	0	0	0	1715.22	1853.18	2566.51	2218.11	1502.94	129.12	2.03213	0	0	3642.85	4485.67	6320.8	5497.01	3509.87	957.619	62.1675	0	0	122.792	132.325	193.357	217.627	192.055	100.253	13.4369	0
[ID_8]_sotalol	Training	-0.0843891	0	-1.7015	2.8951	46.0083	41.9619	6	6	38	18	20	0	12	2	3	1	0	0	0	0	0	0	3939.63	4249.7	4942.71	4574.76	4370.6	3840.17	2879.57	2754.86	2567.49	7436.46	9309.91	12925.9	13923.3	13057.6	11820.2	9661.24	8127.92	6998.04	294.058	297.954	523.493	686.067	678.527	643.847	555.878	428.564
[ID_9]_propranolol	Training	-0.0372993	0	-1.0098	1.0197	35.5013	44.8667	10	11	40	19	21	0	16	1	2	0	0	0	0	0	0	0	3037.7	3337.21	4536.47	4676.58	3954.34	3604.36	3075.93	2688.42	2254.59	8105.12	10251.9	14412.4	15537.8	13911.9	12589.8	11232.5	9604.97	8430.03	298.641	313.736	539.855	715.44	714.4	624.693	611.396	572.764
[ID_10]_hydrochlorothiazide	Training	-0.103529	0	-1.5436	2.3827	35.4327	32.1423	6	6	25	17	8	0	7	3	4	2	0	0	1	0	0	1	5942.83	5620.98	7073.13	8071.21	7954.13	6595.22	5043.15	866.663	121.025	6506.32	7977.95	12113	13744.7	11991.9	8503.39	5766.54	2501.93	855.795	220.106	221.032	390.644	488.447	497.475	389.436	306.303	178.617
[ID_11]_fluconazole	Training	-0.0831251	0	0.2638	0.0695904	21.833	39.3975	16	16	34	22	12	0	13	6	1	0	0	2	0	0	0	2	4042.65	4171	6088.54	5769.74	6773.52	6592.77	6491.66	5226.79	2618.41	7909.09	9702.88	14265.5	14997.4	15684.7	16034.8	15030.2	11936.1	6428.66	285.21	295.742	489.195	607.754	710.597	727.144	697.176	564.501
[ID_12]_venlafaxine	Training	-0.0575951	0	-1.2265	1.5043	51.6282	50.6274	6	6	47	20	27	0	17	1	2	0	0	0	0	0	0	0	3188.06	3576.08	5035.35	5585.45	5505.66	5587.72	4535.86	3195.3	2105.95	8715.14	11289.1	16884.6	20401.6	20748.2	20827.7	19609.8	14842.2	9001.59	346.492	364.051	669.793	908.111	1104.92	1068.43	1059.56	1034.39
[ID_13]_metoprolol	Training	-0.0835987	0	-0.7944	0.631071	51.9811	46.5758	6	6	44	19	25	0	15	1	3	0	0	0	0	0	0	0	3153.46	3337.17	4237.3	4197.35	3590.21	3685.13	3176.23	2451.31	2248.05	8022.33	10045.8	13586.6	14579.8	13463.7	12555.6	11325	9291.7	8219.19	331.326	339.653	600.675	748.881	781.115	700.431	644.657	598.335
[ID_14]_gabapentin	Training	-0.0913542	1	-2.0523	4.21194	41.7889	29.8795	0	0	29	12	17	0	9	1	2	0	0	0	0	0	0	0	2023.78	2064.81	2927.18	2953.24	2830.26	2070.18	715.205	86.7757	2.03213	5016.17	6600.38	9975.03	11769.1	10651.2	7274.87	3222.78	753.629	62.1675	218.984	222.379	409.393	609.568	699.24	617.893	349.07	112.187
[ID_15]_furosemide	Training	-0.217169	1	-0.9949	0.989826	33.6078	39.7447	11	11	32	21	11	0	12	2	5	1	0	0	1	0	0	1	5699.12	5121.05	6755.92	7445.25	7837.75	6229.29	6570.95	4467.08	3688.59	8093.45	9722.2	13926.9	14795.9	14391.8	12734.9	11341.5	9365.93	7238.12	272.371	273.47	443.158	544.989	570.221	554.046	497.937	409.929
[ID_16]_diclofenac	Training	-0.193074	1	0.8632	0.745114	26.2997	39.0387	12	12	30	19	11	0	14	1	2	0	0	0	2	0	0	2	5252.41	3731.29	5579.9	6403.34	6454.43	5300.77	5472.03	4059.12	3589.08	7955.2	9302.32	13170.7	14344.5	13288.7	12442.5	12229.9	9753.72	5661.1	240.527	244.07	383.509	507.921	496.099	462.749	439.823	405.151
[ID_18]_atenolol	Training	-0.571379	0	-1.6098	2.59146	47.492	43.9154	6	6	41	19	22	0	14	2	3	0	0	0	0	0	0	0	3202.35	3280.95	4401.69	4217.21	3695.64	3714.84	3011.53	2424.22	2189.74	7748.88	9664.32	13210.2	14117.2	12816.9	11869.5	10284.5	8183.03	7641.31	313.832	319.359	546.065	723.149	727.855	630.912	612.198	527.38
[ID_20]_valsartan	Training	-0.541211	3	-1.3575	1.84281	56.5347	69.483	17	19	61	32	29	0	24	5	3	0	0	0	0	0	0	0	5240.69	5681.48	7947.6	8621.78	9819.89	10195.7	8754	7150.29	5646.56	12931.6	16250.9	23359.6	27083	29645.6	31103.5	29435.9	25825	21364.8	466.871	487.918	831.138	1085.95	1267.9	1359.76	1393.86	1294.27
[ID_21]_ketoprofen	Training	-0.700057	1	-0.2088	0.0435974	21.9194	39.9011	12	12	33	19	14	0	16	0	3	0	0	0	0	0	0	0	3090.35	3202.5	4504.16	4879.65	4392.29	3949.99	3301.84	2708.16	1925.87	7860.62	9681.57	13706.3	15204.3	13885.9	12433.2	10717.4	8633.26	6637.99	254.762	260.291	417.475	554.843	583.462	522.042	457.406	400.422
[ID_22]_metoprolol_acid	Training	-0.740645	1	-1.2148	1.47574	47.2698	42.9507	6	6	40	19	21	0	14	1	4	0	0	0	0	0	0	0	3261.1	3292.77	4444.36	4216.92	3729.35	3742.49	3013.23	2441.95	2197.54	7690.87	9554.12	13033	13892.3	12603.4	11593.5	9964.7	7993.06	7541.02	310.263	313.536	535.173	710.208	709.827	621.587	588.174	508.506
[ID_24]_sulfamethoxazole	Training	-1.00393	0	-1.401	1.9628	22.7153	33.5407	11	11	28	17	11	0	10	3	3	1	0	0	0	0	0	0	3838.15	4218.56	5410.03	5164.06	4614.31	3805.27	2894.76	1817.24	1183.1	6552.98	8088.17	11351	11305.5	9860.3	8004.31	6909.77	5878.86	3917.54	228.712	236.834	382.793	451.11	472.198	367.362	274.76	307.856
[ID_25]_aniline	Training	-0.854493	0	-0.7499	0.56235	4.2221	16.3276	6	6	14	7	7	0	6	1	0	0	0	0	0	0	0	0	1068.89	1122.6	1348.36	971.07	313.568	44.4296	2.03213	0	0	3002	3609.73	4591.05	3817.15	1776.24	502.942	62.1675	0	0	102.474	106.16	154.915	183.241	143.135	62.8249	13.4369	0
[ID_27]_acesulfame	Training	-1.10403	0	-0.6738	0.454006	32.737	17.582	0	0	15	10	5	0	4	1	4	1	0	0	0	0	0	0	2830.05	3035.75	3575.71	2968.36	2078.72	231.861	3.04819	0	0	3555.14	4202.06	5566.58	5324.51	3611.91	1277.79	93.2512	0	0	136.107	130.069	227.458	232.667	184.998	136.137	20.1554	0
[ID_29]_acetaminophen	Training	-2.4437	0	-1.0852	1.17766	15.4305	22.7851	6	6	20	11	9	0	8	1	2	0	0	0	0	0	0	0	1871.39	1845.65	2487.7	2105.33	1548.82	1224.85	694.045	503.673	76.6151	4343.98	5184.23	6764.86	6571.97	5032.56	3832.84	2466.38	1195.65	442.791	157.695	157.966	240.671	297.074	257.53	199.025	161.552	98.8854
[ID_30]_caffeine	Training	-2.92082	0	-1.4217	2.02123	27.3135	26.7519	5	5	24	14	10	0	8	4	2	0	0	0	0	0	0	0	2460.99	2644.55	4045.6	4595.61	3920.83	1807.6	541.257	69.7183	0	5105.01	6130.97	9221.17	10674.9	9553.42	6259.13	3444.68	898.8	0	195.019	202.803	353.984	375.961	484.545	337.181	288.612	169.501
[truncated: 2,829 more columns]

## Sheet: Taˣ
Name	Status	LogBT.Eq2	nAcid	ALogP	ALogp2	AMR	apol	naAromAtom	nAromBond	nAtom	nHeavyAtom	nH	nB	nC	nN	nO	nS	nP	nF	nCl	nBr	nI	nX	ATS0m	ATS1m	ATS2m	ATS3m	ATS4m	ATS5m	ATS6m	ATS7m	ATS8m	ATS0v	ATS1v	ATS2v	ATS3v	ATS4v	ATS5v	ATS6v	ATS7v	ATS8v	ATS0e	ATS1e	ATS2e	ATS3e	ATS4e	ATS5e	ATS6e	ATS7e
[ID_2]_Tramadol	Training	-0.0210438	0	-0.9385	0.880782	48.7166	47.5338	6	6	44	19	25	0	16	1	2	0	0	0	0	0	0	0	3041.76	3407.6	4841.64	5538.53	5362.04	5209.34	4002.67	2550.98	1463.87	8229.46	10636.1	15971.1	19481	19771.1	19123.2	16872.4	12264.2	7487.27	325.515	342.275	627.063	842.637	1042.05	1000.24	982.878	855.968
[ID_4]_oxazepam	Training	-0.0492458	0	-0.3188	0.101633	25.4206	39.7187	12	12	31	20	11	0	15	2	2	0	0	0	1	0	0	1	4336.17	3786.24	5706.94	6641.96	5906.77	6268.84	5517.86	3959.71	1064.17	8118.06	9905.86	14425	16780.9	15506	15277.9	13746.8	8933.76	3386.02	246.193	259.609	418.491	571.18	549.62	524.926	554.565	463.036
[ID_6]_carbamazepine-10___11-epoxide	Training	-0.0480314	0	-0.8826	0.778983	18.3575	38.2055	12	12	31	19	12	0	15	2	2	0	0	0	0	0	0	0	3080.48	3562.72	5030.84	6203.38	6286.66	5500.09	2847.27	762.771	83.8192	7645.17	9866.28	14204.9	17608.5	17785.6	16222.5	10078.8	4428.39	1030.34	240.836	266.026	429.294	573.711	625.372	655.962	556.76	332.832
[ID_7]_4-hydroxy-1H-benzotriazole	Training	-0.0695604	0	-0.8807	0.775632	5.8646	17.996	9	10	15	10	5	0	6	3	1	0	0	0	0	0	0	0	1715.22	1853.18	2566.51	2218.11	1502.94	129.12	2.03213	0	0	3642.85	4485.67	6320.8	5497.01	3509.87	957.619	62.1675	0	0	122.792	132.325	193.357	217.627	192.055	100.253	13.4369	0
[ID_8]_sotalol	Training	-0.0843891	0	-1.7015	2.8951	46.0083	41.9619	6	6	38	18	20	0	12	2	3	1	0	0	0	0	0	0	3939.63	4249.7	4942.71	4574.76	4370.6	3840.17	2879.57	2754.86	2567.49	7436.46	9309.91	12925.9	13923.3	13057.6	11820.2	9661.24	8127.92	6998.04	294.058	297.954	523.493	686.067	678.527	643.847	555.878	428.564
[ID_9]_propranolol	Training	-0.0372993	0	-1.0098	1.0197	35.5013	44.8667	10	11	40	19	21	0	16	1	2	0	0	0	0	0	0	0	3037.7	3337.21	4536.47	4676.58	3954.34	3604.36	3075.93	2688.42	2254.59	8105.12	10251.9	14412.4	15537.8	13911.9	12589.8	11232.5	9604.97	8430.03	298.641	313.736	539.855	715.44	714.4	624.693	611.396	572.764
[ID_10]_hydrochlorothiazide	Training	-0.103529	0	-1.5436	2.3827	35.4327	32.1423	6	6	25	17	8	0	7	3	4	2	0	0	1	0	0	1	5942.83	5620.98	7073.13	8071.21	7954.13	6595.22	5043.15	866.663	121.025	6506.32	7977.95	12113	13744.7	11991.9	8503.39	5766.54	2501.93	855.795	220.106	221.032	390.644	488.447	497.475	389.436	306.303	178.617
[ID_11]_fluconazole	Training	-0.0831251	0	0.2638	0.0695904	21.833	39.3975	16	16	34	22	12	0	13	6	1	0	0	2	0	0	0	2	4042.65	4171	6088.54	5769.74	6773.52	6592.77	6491.66	5226.79	2618.41	7909.09	9702.88	14265.5	14997.4	15684.7	16034.8	15030.2	11936.1	6428.66	285.21	295.742	489.195	607.754	710.597	727.144	697.176	564.501
[ID_12]_venlafaxine	Training	-0.0575951	0	-1.2265	1.5043	51.6282	50.6274	6	6	47	20	27	0	17	1	2	0	0	0	0	0	0	0	3188.06	3576.08	5035.35	5585.45	5505.66	5587.72	4535.86	3195.3	2105.95	8715.14	11289.1	16884.6	20401.6	20748.2	20827.7	19609.8	14842.2	9001.59	346.492	364.051	669.793	908.111	1104.92	1068.43	1059.56	1034.39
[ID_13]_metoprolol	Training	-0.0835987	0	-0.7944	0.631071	51.9811	46.5758	6	6	44	19	25	0	15	1	3	0	0	0	0	0	0	0	3153.46	3337.17	4237.3	4197.35	3590.21	3685.13	3176.23	2451.31	2248.05	8022.33	10045.8	13586.6	14579.8	13463.7	12555.6	11325	9291.7	8219.19	331.326	339.653	600.675	748.881	781.115	700.431	644.657	598.335
[ID_14]_gabapentin	Training	-0.0913542	1	-2.0523	4.21194	41.7889	29.8795	0	0	29	12	17	0	9	1	2	0	0	0	0	0	0	0	2023.78	2064.81	2927.18	2953.24	2830.26	2070.18	715.205	86.7757	2.03213	5016.17	6600.38	9975.03	11769.1	10651.2	7274.87	3222.78	753.629	62.1675	218.984	222.379	409.393	609.568	699.24	617.893	349.07	112.187
[ID_15]_furosemide	Training	-0.217169	1	-0.9949	0.989826	33.6078	39.7447	11	11	32	21	11	0	12	2	5	1	0	0	1	0	0	1	5699.12	5121.05	6755.92	7445.25	7837.75	6229.29	6570.95	4467.08	3688.59	8093.45	9722.2	13926.9	14795.9	14391.8	12734.9	11341.5	9365.93	7238.12	272.371	273.47	443.158	544.989	570.221	554.046	497.937	409.929
[ID_16]_diclofenac	Training	-0.193074	1	0.8632	0.745114	26.2997	39.0387	12	12	30	19	11	0	14	1	2	0	0	0	2	0	0	2	5252.41	3731.29	5579.9	6403.34	6454.43	5300.77	5472.03	4059.12	3589.08	7955.2	9302.32	13170.7	14344.5	13288.7	12442.5	12229.9	9753.72	5661.1	240.527	244.07	383.509	507.921	496.099	462.749	439.823	405.151
[ID_18]_atenolol	Training	-0.571379	0	-1.6098	2.59146	47.492	43.9154	6	6	41	19	22	0	14	2	3	0	0	0	0	0	0	0	3202.35	3280.95	4401.69	4217.21	3695.64	3714.84	3011.53	2424.22	2189.74	7748.88	9664.32	13210.2	14117.2	12816.9	11869.5	10284.5	8183.03	7641.31	313.832	319.359	546.065	723.149	727.855	630.912	612.198	527.38
[ID_20]_valsartan	Training	-0.541211	3	-1.3575	1.84281	56.5347	69.483	17	19	61	32	29	0	24	5	3	0	0	0	0	0	0	0	5240.69	5681.48	7947.6	8621.78	9819.89	10195.7	8754	7150.29	5646.56	12931.6	16250.9	23359.6	27083	29645.6	31103.5	29435.9	25825	21364.8	466.871	487.918	831.138	1085.95	1267.9	1359.76	1393.86	1294.27
[ID_21]_ketoprofen	Training	-0.700057	1	-0.2088	0.0435974	21.9194	39.9011	12	12	33	19	14	0	16	0	3	0	0	0	0	0	0	0	3090.35	3202.5	4504.16	4879.65	4392.29	3949.99	3301.84	2708.16	1925.87	7860.62	9681.57	13706.3	15204.3	13885.9	12433.2	10717.4	8633.26	6637.99	254.762	260.291	417.475	554.843	583.462	522.042	457.406	400.422
[ID_22]_metoprolol_acid	Training	-0.740645	1	-1.2148	1.47574	47.2698	42.9507	6	6	40	19	21	0	14	1	4	0	0	0	0	0	0	0	3261.1	3292.77	4444.36	4216.92	3729.35	3742.49	3013.23	2441.95	2197.54	7690.87	9554.12	13033	13892.3	12603.4	11593.5	9964.7	7993.06	7541.02	310.263	313.536	535.173	710.208	709.827	621.587	588.174	508.506
[ID_24]_sulfamethoxazole	Training	-1.00393	0	-1.401	1.9628	22.7153	33.5407	11	11	28	17	11	0	10	3	3	1	0	0	0	0	0	0	3838.15	4218.56	5410.03	5164.06	4614.31	3805.27	2894.76	1817.24	1183.1	6552.98	8088.17	11351	11305.5	9860.3	8004.31	6909.77	5878.86	3917.54	228.712	236.834	382.793	451.11	472.198	367.362	274.76	307.856
[ID_27]_acesulfame	Training	-1.10403	0	-0.6738	0.454006	32.737	17.582	0	0	15	10	5	0	4	1	4	1	0	0	0	0	0	0	2830.05	3035.75	3575.71	2968.36	2078.72	231.861	3.04819	0	0	3555.14	4202.06	5566.58	5324.51	3611.91	1277.79	93.2512	0	0	136.107	130.069	227.458	232.667	184.998	136.137	20.1554	0
[ID_30]_caffeine	Training	-2.92082	0	-1.4217	2.02123	27.3135	26.7519	5	5	24	14	10	0	8	4	2	0	0	0	0	0	0	0	2460.99	2644.55	4045.6	4595.61	3920.83	1807.6	541.257	69.7183	0	5105.01	6130.97	9221.17	10674.9	9553.42	6259.13	3444.68	898.8	0	195.019	202.803	353.984	375.961	484.545	337.181	288.612	169.501
[truncated: 2,829 more columns]

## Sheet: Ta+Nt
Name	Status	LogBT.Eq2	nAcid	ALogP	ALogp2	AMR	apol	naAromAtom	nAromBond	nAtom	nHeavyAtom	nH	nB	nC	nN	nO	nS	nP	nF	nCl	nBr	nI	nX	ATS0m	ATS1m	ATS2m	ATS3m	ATS4m	ATS5m	ATS6m	ATS7m	ATS8m	ATS0v	ATS1v	ATS2v	ATS3v	ATS4v	ATS5v	ATS6v	ATS7v	ATS8v	ATS0e	ATS1e	ATS2e	ATS3e	ATS4e	ATS5e	ATS6e	ATS7e
[ID_2]_Tramadol	Training	-0.0210438	0	-0.9385	0.880782	48.7166	47.5338	6	6	44	19	25	0	16	1	2	0	0	0	0	0	0	0	3041.76	3407.6	4841.64	5538.53	5362.04	5209.34	4002.67	2550.98	1463.87	8229.46	10636.1	15971.1	19481	19771.1	19123.2	16872.4	12264.2	7487.27	325.515	342.275	627.063	842.637	1042.05	1000.24	982.878	855.968
[ID_4]_oxazepam	Training	-0.0492458	0	-0.3188	0.101633	25.4206	39.7187	12	12	31	20	11	0	15	2	2	0	0	0	1	0	0	1	4336.17	3786.24	5706.94	6641.96	5906.77	6268.84	5517.86	3959.71	1064.17	8118.06	9905.86	14425	16780.9	15506	15277.9	13746.8	8933.76	3386.02	246.193	259.609	418.491	571.18	549.62	524.926	554.565	463.036
[ID_6]_carbamazepine-10___11-epoxide	Training	-0.0480314	0	-0.8826	0.778983	18.3575	38.2055	12	12	31	19	12	0	15	2	2	0	0	0	0	0	0	0	3080.48	3562.72	5030.84	6203.38	6286.66	5500.09	2847.27	762.771	83.8192	7645.17	9866.28	14204.9	17608.5	17785.6	16222.5	10078.8	4428.39	1030.34	240.836	266.026	429.294	573.711	625.372	655.962	556.76	332.832
[ID_7]_4-hydroxy-1H-benzotriazole	Training	-0.0695604	0	-0.8807	0.775632	5.8646	17.996	9	10	15	10	5	0	6	3	1	0	0	0	0	0	0	0	1715.22	1853.18	2566.51	2218.11	1502.94	129.12	2.03213	0	0	3642.85	4485.67	6320.8	5497.01	3509.87	957.619	62.1675	0	0	122.792	132.325	193.357	217.627	192.055	100.253	13.4369	0
[ID_8]_sotalol	Training	-0.0843891	0	-1.7015	2.8951	46.0083	41.9619	6	6	38	18	20	0	12	2	3	1	0	0	0	0	0	0	3939.63	4249.7	4942.71	4574.76	4370.6	3840.17	2879.57	2754.86	2567.49	7436.46	9309.91	12925.9	13923.3	13057.6	11820.2	9661.24	8127.92	6998.04	294.058	297.954	523.493	686.067	678.527	643.847	555.878	428.564
[ID_9]_propranolol	Training	-0.0372993	0	-1.0098	1.0197	35.5013	44.8667	10	11	40	19	21	0	16	1	2	0	0	0	0	0	0	0	3037.7	3337.21	4536.47	4676.58	3954.34	3604.36	3075.93	2688.42	2254.59	8105.12	10251.9	14412.4	15537.8	13911.9	12589.8	11232.5	9604.97	8430.03	298.641	313.736	539.855	715.44	714.4	624.693	611.396	572.764
[ID_10]_hydrochlorothiazide	Training	-0.103529	0	-1.5436	2.3827	35.4327	32.1423	6	6	25	17	8	0	7	3	4	2	0	0	1	0	0	1	5942.83	5620.98	7073.13	8071.21	7954.13	6595.22	5043.15	866.663	121.025	6506.32	7977.95	12113	13744.7	11991.9	8503.39	5766.54	2501.93	855.795	220.106	221.032	390.644	488.447	497.475	389.436	306.303	178.617
[ID_11]_fluconazole	Training	-0.0831251	0	0.2638	0.0695904	21.833	39.3975	16	16	34	22	12	0	13	6	1	0	0	2	0	0	0	2	4042.65	4171	6088.54	5769.74	6773.52	6592.77	6491.66	5226.79	2618.41	7909.09	9702.88	14265.5	14997.4	15684.7	16034.8	15030.2	11936.1	6428.66	285.21	295.742	489.195	607.754	710.597	727.144	697.176	564.501
[ID_12]_venlafaxine	Training	-0.0575951	0	-1.2265	1.5043	51.6282	50.6274	6	6	47	20	27	0	17	1	2	0	0	0	0	0	0	0	3188.06	3576.08	5035.35	5585.45	5505.66	5587.72	4535.86	3195.3	2105.95	8715.14	11289.1	16884.6	20401.6	20748.2	20827.7	19609.8	14842.2	9001.59	346.492	364.051	669.793	908.111	1104.92	1068.43	1059.56	1034.39
[ID_13]_metoprolol	Training	-0.0835987	0	-0.7944	0.631071	51.9811	46.5758	6	6	44	19	25	0	15	1	3	0	0	0	0	0	0	0	3153.46	3337.17	4237.3	4197.35	3590.21	3685.13	3176.23	2451.31	2248.05	8022.33	10045.8	13586.6	14579.8	13463.7	12555.6	11325	9291.7	8219.19	331.326	339.653	600.675	748.881	781.115	700.431	644.657	598.335
[ID_14]_gabapentin	Training	-0.0913542	1	-2.0523	4.21194	41.7889	29.8795	0	0	29	12	17	0	9	1	2	0	0	0	0	0	0	0	2023.78	2064.81	2927.18	2953.24	2830.26	2070.18	715.205	86.7757	2.03213	5016.17	6600.38	9975.03	11769.1	10651.2	7274.87	3222.78	753.629	62.1675	218.984	222.379	409.393	609.568	699.24	617.893	349.07	112.187
[ID_15]_furosemide	Training	-0.217169	1	-0.9949	0.989826	33.6078	39.7447	11	11	32	21	11	0	12	2	5	1	0	0	1	0	0	1	5699.12	5121.05	6755.92	7445.25	7837.75	6229.29	6570.95	4467.08	3688.59	8093.45	9722.2	13926.9	14795.9	14391.8	12734.9	11341.5	9365.93	7238.12	272.371	273.47	443.158	544.989	570.221	554.046	497.937	409.929
[ID_16]_diclofenac	Training	-0.193074	1	0.8632	0.745114	26.2997	39.0387	12	12	30	19	11	0	14	1	2	0	0	0	2	0	0	2	5252.41	3731.29	5579.9	6403.34	6454.43	5300.77	5472.03	4059.12	3589.08	7955.2	9302.32	13170.7	14344.5	13288.7	12442.5	12229.9	9753.72	5661.1	240.527	244.07	383.509	507.921	496.099	462.749	439.823	405.151
[ID_18]_atenolol	Training	-0.571379	0	-1.6098	2.59146	47.492	43.9154	6	6	41	19	22	0	14	2	3	0	0	0	0	0	0	0	3202.35	3280.95	4401.69	4217.21	3695.64	3714.84	3011.53	2424.22	2189.74	7748.88	9664.32	13210.2	14117.2	12816.9	11869.5	10284.5	8183.03	7641.31	313.832	319.359	546.065	723.149	727.855	630.912	612.198	527.38
[ID_20]_valsartan	Training	-0.541211	3	-1.3575	1.84281	56.5347	69.483	17	19	61	32	29	0	24	5	3	0	0	0	0	0	0	0	5240.69	5681.48	7947.6	8621.78	9819.89	10195.7	8754	7150.29	5646.56	12931.6	16250.9	23359.6	27083	29645.6	31103.5	29435.9	25825	21364.8	466.871	487.918	831.138	1085.95	1267.9	1359.76	1393.86	1294.27
[ID_21]_ketoprofen	Training	-0.700057	1	-0.2088	0.0435974	21.9194	39.9011	12	12	33	19	14	0	16	0	3	0	0	0	0	0	0	0	3090.35	3202.5	4504.16	4879.65	4392.29	3949.99	3301.84	2708.16	1925.87	7860.62	9681.57	13706.3	15204.3	13885.9	12433.2	10717.4	8633.26	6637.99	254.762	260.291	417.475	554.843	583.462	522.042	457.406	400.422
[ID_22]_metoprolol_acid	Training	-0.740645	1	-1.2148	1.47574	47.2698	42.9507	6	6	40	19	21	0	14	1	4	0	0	0	0	0	0	0	3261.1	3292.77	4444.36	4216.92	3729.35	3742.49	3013.23	2441.95	2197.54	7690.87	9554.12	13033	13892.3	12603.4	11593.5	9964.7	7993.06	7541.02	310.263	313.536	535.173	710.208	709.827	621.587	588.174	508.506
[ID_24]_sulfamethoxazole	Training	-1.00393	0	-1.401	1.9628	22.7153	33.5407	11	11	28	17	11	0	10	3	3	1	0	0	0	0	0	0	3838.15	4218.56	5410.03	5164.06	4614.31	3805.27	2894.76	1817.24	1183.1	6552.98	8088.17	11351	11305.5	9860.3	8004.31	6909.77	5878.86	3917.54	228.712	236.834	382.793	451.11	472.198	367.362	274.76	307.856
[ID_25]_aniline	Training	-0.854493	0	-0.7499	0.56235	4.2221	16.3276	6	6	14	7	7	0	6	1	0	0	0	0	0	0	0	0	1068.89	1122.6	1348.36	971.07	313.568	44.4296	2.03213	0	0	3002	3609.73	4591.05	3817.15	1776.24	502.942	62.1675	0	0	102.474	106.16	154.915	183.241	143.135	62.8249	13.4369	0
[ID_27]_acesulfame	Training	-1.10403	0	-0.6738	0.454006	32.737	17.582	0	0	15	10	5	0	4	1	4	1	0	0	0	0	0	0	2830.05	3035.75	3575.71	2968.36	2078.72	231.861	3.04819	0	0	3555.14	4202.06	5566.58	5324.51	3611.91	1277.79	93.2512	0	0	136.107	130.069	227.458	232.667	184.998	136.137	20.1554	0
[ID_29]_acetaminophen	Training	-2.4437	0	-1.0852	1.17766	15.4305	22.7851	6	6	20	11	9	0	8	1	2	0	0	0	0	0	0	0	1871.39	1845.65	2487.7	2105.33	1548.82	1224.85	694.045	503.673	76.6151	4343.98	5184.23	6764.86	6571.97	5032.56	3832.84	2466.38	1195.65	442.791	157.695	157.966	240.671	297.074	257.53	199.025	161.552	98.8854
[ID_30]_caffeine	Training	-2.92082	0	-1.4217	2.02123	27.3135	26.7519	5	5	24	14	10	0	8	4	2	0	0	0	0	0	0	0	2460.99	2644.55	4045.6	4595.61	3920.83	1807.6	541.257	69.7183	0	5105.01	6130.97	9221.17	10674.9	9553.42	6259.13	3444.68	898.8	0	195.019	202.803	353.984	375.961	484.545	337.181	288.612	169.501
[ID_35]_1-Aminocyclohexanecarboxylic_acid	Training	-2.72824	1	-1.6274	2.64843	31.3828	23.6923	0	0	23	10	13	0	7	1	2	0	0	0	0	0	0	0	1731.19	1727.85	2583.68	2738.83	1611.8	636.578	84.7436	2.03213	0	4044.8	5294.4	7998.46	8913.49	6415.18	2807.76	691.461	62.1675	0	177.029	178.827	324.072	489.45	515.091	302.907	98.75	13.4369
[ID_36]_1-Methyluric_acid	Test	-1.79518	0	-2.3188	5.37683	27.4323	20.0332	0	0	17	13	4	0	6	4	3	0	0	0	0	0	0	0	2422.34	2429.6	3821.9	3725.14	2917.95	1526.05	538.918	51.4292	0	4287.87	5075.49	7333.25	7393.64	5422.45	2881.39	1238.97	339.292	0	152.979	153.751	254.858	263.443	258.983	146.483	76.6927	48.5689
[ID_38]_1___7-Dimethyluric_acid	Training	-1.55262	0	-2.2165	4.91287	33.129	23.1268	0	0	20	14	6	0	7	4	3	0	0	0	0	0	0	0	2568.63	2620.04	4131.62	4390.24	3585.75	1901.3	827.938	105.907	0	4773.55	5653.75	8304.97	9182.15	7333.09	4245.27	2459.59	771.835	0	173.956	175.596	300.695	306.888	368.279	212.43	143.668	117.293
[ID_39]_10-Hydroxycarbazepine	Training	-2.72403	0	-1.076	1.15778	20.7705	39.5391	12	12	33	19	14	0	15	2	2	0	0	0	0	0	0	0	3082.51	3398.79	5052.06	6106.03	6372.45	5791.17	3152.44	827.348	86.8674	7707.34	9760.3	14498.2	18105.7	18687	17572.4	11392.7	4980.62	1123.59	254.273	272.581	447.894	631.645	694.159	748.618	669.914	407.482
[ID_44]_2-[4-(3-Amino-2-hydroxypropoxy)phenyl]acetamide	Training	-1.21517	0	-1.9915	3.96607	33.2188	34.6347	6	6	32	16	16	0	11	2	3	0	0	0	0	0	0	0	2763.46	2753.55	3660.63	3573.55	2937.37	2694.37	2227.73	1744.22	1229.33	6291.83	7780.09	10560.9	11022.1	9566.14	8426.58	7139.6	5552.11	4244.48	250.9	253.963	414.63	546.086	518.882	433.133	379.532	326.576
[ID_45]_2-Methoxy-5-methylaniline	Test	-1.62666	0	-0.1597	0.0255041	17.04	23.3167	6	6	21	10	11	0	8	1	1	0	0	0	0	0	0	0	1617.45	1699.62	2207.85	2240.26	1471.69	650.227	249.288	72.6425	9.14458	4189.76	5097.65	6784.86	7051.09	5640.55	3565.29	1635.44	688.42	279.754	157.781	162.238	259.211	276.002	315.068	256.992	191.676	42.7058
[ID_46]_2-Phenylbenzimidazole-5-sulfonic_acid	Training	-0.0270344	1	-0.9619	0.925252	14.2194	37.0539	15	17	29	19	10	0	13	2	3	1	0	0	0	0	0	0	4073.73	4599.35	5878.64	5410.88	4746.86	4178.85	3352.91	2438.26	2415.56	7549.14	9457.44	13709.9	13849.1	11926.7	9914.86	8686.79	6678.76	5389.89	234.414	248.335	405.653	486.383	489.129	399.375	335.528	261.174
[ID_50]_2___4-Diaminotoluene	Training	-1.39836	0	-0.8578	0.735821	13.9463	21.1879	6	6	19	9	10	0	7	2	0	0	0	0	0	0	0	0	1412.4	1475.44	1989.54	1860.13	1011.94	340.856	72.6677	6.09638	0	3762.08	4642.92	6319.17	6424.09	4463.99	2087.42	676.874	186.502	0	140.372	146.146	221.529	262.581	293.333	214.202	79.3826	40.3108
[ID_55]_3___5-Dimethyl-1-phenylpyrazole	Test	-1.13723	0	0.8922	0.796021	14.363	29.5615	11	12	25	13	12	0	11	2	0	0	0	0	0	0	0	0	1991.49	2288.84	3180.81	2815.25	2304.53	1813.68	1031.18	340.095	58.589	5518.32	6818.35	9376.02	9220.49	8329.22	7324.14	5371.92	2579.74	769.784	183.971	197.331	322.77	365.809	372.69	292.85	323.901	208.363
[ID_56]_4-Acetamidobenzaldehyde	Training	-0.572823	0	-0.8173	0.667979	19.1598	24.5451	6	6	21	12	9	0	9	1	2	0	0	0	0	0	0	0	2015.65	1985.89	2600.19	2385.82	1909.46	1393.41	866.223	600.26	512.687	4767.5	5640.47	7391.18	7484.45	5988.28	4391.15	2849.35	1787.52	1060.08	165.236	163.153	255.189	307.448	289.34	225.101	168.376	112.579
[ID_58]_4-Aminophenol	Training	-0.644802	0	-1.2102	1.46458	6.7867	17.1296	6	6	15	8	7	0	6	1	1	0	0	0	0	0	0	0	1324.86	1318.78	1720.58	1385.62	550.094	268.548	46.373	2.03213	0	3218.39	3879.73	5081.77	4524.47	2357.74	822.338	250.993	62.1675	0	115.826	118.547	167.865	208.815	179.229	86.7715	27.2212	13.4369
[ID_63]_6-Aminocaproic_acid	Test	-1.64922	1	-1.8073	3.26633	29.4376	21.9323	0	0	22	9	13	0	6	1	2	0	0	0	0	0	0	0	1586.93	1439.32	1674.17	1320.37	1109.52	912.765	716.008	555.122	80.6592	3621.29	4447.37	5606.83	5353.22	4326.57	3319.78	2312.98	1317.68	477.188	169.488	163.746	278.691	370.743	311.823	248.939	186.054	122.89
[ID_64]_6-Methyl[1___2___4]triazolo[4___3-b]pyridazin-8-ol	Test	-2.18076	0	0.0214	0.00045796	21.4526	19.096	5	5	16	11	5	0	6	4	1	0	0	0	0	0	0	0	1911.42	2063.34	2959.74	2624.48	1904.21	524.067	88.7786	0	0	3886.17	4662.16	6516.12	5839.62	4399.72	2089.67	646.132	0	0	132.994	140.041	221.871	229.645	189.481	127.764	76.5469	0
[ID_66]_7-Methylguanine	Training	-2.32035	0	-0.3773	0.142355	21.2373	20.8628	5	5	18	12	6	0	6	5	1	0	0	0	0	0	0	0	2108.63	2239.74	3347.16	3089.22	2627.17	768.853	271.131	68.6035	6.09638	4160.57	4992.75	7107.07	6964.19	5512.25	2606.83	1155.59	552.539	186.502	149.914	157.85	251.854	249.644	258.443	179.202	69.1954	52.5087
[ID_67]_7-Methylxanthine	Training	-2.5272	0	-0.9537	0.909544	16.4805	19.2312	5	5	16	12	4	0	6	4	2	0	0	0	0	0	0	0	2166.37	2235.43	3377.73	3080.59	2662.44	735.975	244.612	48.381	0	4071.47	4800.53	6818.8	6579.76	5008.1	2007.26	728.953	246.041	0	139.627	142.556	233.838	219.055	234.385	132.2	40.8579	28.4135
[ID_69]_Acetanilide	Training	-2.89886	0	-0.6249	0.3905	12.8659	21.9831	6	6	19	10	9	0	8	1	1	0	0	0	0	0	0	0	1615.42	1649.46	2115.48	1690.78	1312.29	1000.74	484.758	70.6517	3.04819	4127.59	4914.23	6274.14	5864.65	4451.06	3513.44	2140.49	727.463	93.2512	144.344	145.579	227.72	271.5	221.436	175.078	147.605	78.2525
[ID_71]_Acridine	Test	-2.50197	0	0	0	0	29.9811	14	16	23	14	9	0	13	1	0	0	0	0	0	0	0	0	2080.77	2465.14	3487.63	3450.11	2386.48	1670.69	1063.36	439.91	54.5247	6028.79	7603.89	10972.6	11266	8640.29	6431.39	4501.22	2410.38	645.449	168.695	187.167	298.93	377.958	332.085	246.156	185.999	140.803
[ID_72]_Acycloguanosine	Training	-1.67599	0	-1.0653	1.13486	33.3826	28.6539	5	5	26	16	10	0	8	5	3	0	0	0	0	0	0	0	2913.16	3012.94	4243.02	4172.92	3756.04	2583.46	2196.69	1667.37	1115.7	5564.72	6750.67	9344.3	9286.83	8227.3	6717.37	5787.4	4313.9	3070.27	218.572	226.317	375.269	400.153	390.581	326.602	320.381	248.25
[ID_75]_Azobenzene	Training	-0.518883	0	0	0	0	29.9879	12	12	24	14	10	0	12	2	0	0	0	0	0	0	0	0	2133.72	2384.91	2982.74	2662.5	1828.64	1627.8	1616.16	1376.1	778.898	5879.67	7114.9	9303	8423.97	5711.9	5135.23	5785.94	5577.73	3778.52	178.074	189.406	285.463	352.165	273.941	182.883	177.374	215.315
[ID_76]_Benzophenone	Training	-0.346146	0	-0.2638	0.0695904	5.346	30.3499	12	12	24	14	10	0	13	0	1	0	0	0	0	0	0	0	2141.56	2332.93	3078.96	3087.05	2501.86	2065.04	1408.36	778.898	249.249	6032.95	7379.33	10100	10142.5	8088.07	6899.33	5741.76	3778.52	1590.08	178.563	186.777	290.609	370.274	335.29	259.878	234.258	197.792
[ID_86]_Climbazole	Training	-0.0581216	0	2.0334	4.13472	37.8013	43.7195	11	11	37	20	17	0	15	2	2	0	0	0	1	0	0	1	4342.27	3780.46	5672.17	5800.79	5258.61	5422.23	5076.09	3888.89	3014.81	8304.56	10008	14588.1	15763.6	14457.4	14860.3	16606.3	14082.1	8373.09	286.504	294.984	506.852	644.611	771.465	617.437	618.018	753.867
[ID_93]_Dibenzylamine	Training	-0.24054	0	-0.3972	0.157768	12.7244	35.7419	12	12	30	15	15	0	14	1	0	0	0	0	0	0	0	0	2231.13	2539.79	3162.26	2876.38	2122.81	1829.68	1705.06	1670.73	1380.17	6638.81	8264.54	11235	11099.2	8660.3	7399.57	6971.7	6611.27	5702.06	216.546	231.034	377.341	476.661	468.88	375.064	327.576	270.707
[ID_101]_Ethyl_paraben	Test	-0.343264	0	-0.1987	0.0394817	18.8468	24.9139	6	6	22	12	10	0	9	0	3	0	0	0	0	0	0	0	2076.44	2047.86	2720.98	2613.26	2020.51	1391.57	1130.4	499.914	278.943	4771.66	5713.7	7436.37	7348.78	5782.46	4448.05	3548.72	2348.48	1112.21	175.104	173.99	276.849	323.771	285.538	224.612	182.963	174.878
[ID_102]_Ferulic_acid	Test	-1.4314	1	-0.3908	0.152725	27.3432	27.4759	6	6	24	14	10	0	10	0	4	0	0	0	0	0	0	0	2476.67	2388.31	3192.57	3152.19	2506.82	2158.81	1702.78	1374.97	978.007	5411.57	6407.22	8407.59	8805.43	7723.23	6490.65	4864.65	3093.44	1849.36	195.997	193.917	290.481	337.87	345.759	326.328	271.67	203.049
[ID_104]_Guaifenesin	Test	-1.13305	0	-1.1537	1.33102	26.8864	30.1431	6	6	28	14	14	0	10	0	4	0	0	0	0	0	0	0	2480.74	2484.64	3163.5	3456.32	2633.14	2158.81	2127.85	1619.88	653.679	5535.9	6745.38	8880.8	9115.36	8003.99	7406.13	6683.73	5099.55	2898.32	222.871	224.881	371.379	445.889	422.508	371.507	357.352	346.773
[ID_109]_Indole-3-butyric_acid	Training	-2.64533	1	-0.851	0.724201	22.8455	32.4923	9	10	28	15	13	0	12	1	2	0	0	0	0	0	0	0	2452.51	2615.4	3616.71	3210.42	2634.6	1973.06	1907.51	1849.45	1083.41	6162.39	7760.77	11071.5	11156.9	9713.11	7637.81	6240.22	4906.83	3070.2	214.731	224.139	372.097	479.957	457.211	402.507	324.943	264.755
[ID_110]_Indole-3-pyruvic_acid	Training	-2.82188	1	-0.8892	0.790677	20.4145	28.8671	9	10	24	15	9	0	11	1	3	0	0	0	0	0	0	0	2560.15	2614.87	3757.88	3657.23	2787.84	2501.78	2214.56	1279.55	503.316	5830.93	7181.03	10273.4	10367.8	8872.67	6831.12	5124.11	3183.15	1421.9	193.669	198.162	314.246	393.758	381.958	323.883	255.139	178.559
[ID_111]_Isoprenaline	Test	-0.480304	0	-1.7879	3.19659	34.2992	34.2015	6	6	32	15	17	0	11	1	3	0	0	0	0	0	0	0	2568.28	2575.5	3588.66	3783.69	2898.9	2672.21	2141.83	1499.79	1122.38	6079.6	7609.96	10637.5	11601.4	10076.5	8438.75	7214.97	5960.36	4370.43	247.416	252.27	414.504	566.107	595.644	511.593	430.825	351.852
[ID_114]_L-threo-3-Phenylserine	Test	-1.4948	1	-1.6575	2.74731	20.7267	26.6807	6	6	24	13	11	0	9	1	3	0	0	0	0	0	0	0	2273.65	2188.35	3052.93	3320.68	2768.09	2033.78	1333.37	531.619	48.4253	5046.06	6181.97	8569.82	9213.8	7888.21	6135.36	4112.39	1842.83	403.099	192.025	192.06	299.02	417.894	435.772	348.35	265.839	155.567
[ID_115]_Losartan	Training	-0.470133	2	-1.1233	1.2618	38.9227	63.6382	22	24	53	30	23	0	22	6	1	0	0	0	1	0	0	1	5887.03	5698.25	8153.78	8631.9	9192.37	8833.69	8243.69	6589.04	4838.83	12212.5	15214	22047.8	24365.1	25707.7	26026	24488.6	20412.3	15915.7	407.053	437.147	732.364	895.145	1000.71	1044.96	1023.18	983.065
[ID_117]_Metamfepramone	Test	-0.00794836	0	-0.1518	0.0230432	28.8589	31.2639	6	6	28	13	15	0	11	1	1	0	0	0	0	0	0	0	2054.31	2176.86	2885.82	3128.81	2602.35	1948.13	1256.84	564.094	112.098	5584.65	6798.46	9362.77	10543.5	9489.79	7603.25	5926.36	3819.32	1384.15	207.276	210.975	360.819	435.895	513.231	455.727	311.308	293.363
[ID_118]_Methyl_indole-3-acetate	Training	-2.562	0	-0.3744	0.140175	19.8376	29.3987	9	10	25	14	11	0	11	1	2	0	0	0	0	0	0	0	2306.21	2490.8	3412.88	3161.42	2659.75	2205.61	1586.59	893.765	279.471	5676.7	7019.71	9892.51	10017	8744.08	6455.19	4724.96	3229.49	1691.94	193.754	202.503	335.63	376.525	383.945	350.178	241.853	195.521
[ID_120]_N-(2___4-Dimethylphenyl)formamide	Training	-1.02805	0	0.5803	0.336748	19.7981	25.0767	6	6	22	11	11	0	9	1	1	0	0	0	0	0	0	0	1761.72	1817.94	2353.32	2318.1	1778.39	1184.69	500.908	243.641	51.4292	4613.28	5567.22	7491.96	8062.24	6883.27	4663.02	2155.11	854.927	339.292	165.321	167.355	269.866	306.221	353.084	299.812	218.216	58.6598
[ID_121]_N___N-Dimethylaniline	Training	-0.82849	0	0.2178	0.0474368	14.2914	22.5147	6	6	20	9	11	0	8	1	0	0	0	0	0	0	0	0	1361.49	1503.48	1846.73	1644.98	1040.99	510.586	109.049	6.09638	0	3973.37	4766.24	6309.34	6429.11	5002.57	3204.96	1290.9	186.502	0	144.429	149.849	246.566	270.345	292.301	231.3	137.563	40.3108
[ID_123]_Norfenefrine	Test	-0.664065	0	-1.7093	2.92171	17.4614	24.1187	6	6	22	11	11	0	8	1	2	0	0	0	0	0	0	0	1873.42	1851.92	2475.38	2500.75	1873.89	1390.44	606.215	92.8348	4.06426	4406.15	5455.72	7497.48	7715.51	6142.44	4370.33	2390.97	816.103	124.335	171.132	174.486	270.119	362.343	345.071	284.14	207.32	103.483
[ID_124]_Oxybenzone	Training	-0.554146	0	-0.7759	0.602021	15.2264	35.0475	12	12	29	17	12	0	14	0	3	0	0	0	0	0	0	0	2799.79	2937.66	4006.99	4381.73	3989.77	3105.08	2487.94	1751.33	1042.07	6951.41	8484.27	11729.5	12656	11213.8	9654.73	8024.28	5899.71	3733.04	226.244	233.468	365.501	443.782	460.152	418.984	357.926	298.801
[ID_131]_Phenacetin	Training	-0.598222	0	-0.4263	0.181732	24.4755	28.9723	6	6	26	13	13	0	10	1	2	0	0	0	0	0	0	0	2163.98	2226.49	2908.88	2592.6	2208.59	1817.07	1123.66	885.815	609.784	5315.35	6402.15	8238.41	8275.06	7467.61	6657.13	4582.14	2613.74	2063.08	199.65	201.658	332.532	388.419	324.078	327.613	307.946	186.7
[ID_140]_PV9	Test	-0.0374741	0	-2.3492	5.51874	47.2711	51.5854	6	6	47	20	27	0	18	1	1	0	0	0	0	0	0	0	3076.35	3476.26	4594.38	4661.24	4788.92	4849.86	4320.05	3691.91	2697.45	8922.27	11563.4	16560.3	17754.7	17467.4	18071	18048.6	16751.3	13404.4	340.681	356.711	662.505	907.701	884.156	896.592	919.05	914.64
[ID_146]_Sulfapyridine	Training	-0.363934	0	-1.6864	2.84394	15.3637	34.4987	12	12	28	17	11	0	11	3	2	1	0	0	0	0	0	0	3726.45	4114.8	5157.35	5229.34	4481.42	3669.21	2821.02	1673.11	1131.23	6760.11	8300.51	11513	11902.2	10005.3	8489.5	7374.31	6087.3	4228.11	222.901	231.44	370.131	460.535	460.441	377.16	293.127	274.512
[ID_147]_Theobromine	Training	-1.90027	0	-1.1877	1.41063	21.897	22.9916	5	5	20	13	7	0	7	4	2	0	0	0	0	0	0	0	2313.68	2439.99	3711.66	3826.14	3288.62	1199.51	368.684	57.5256	0	4588.24	5465.75	8019.98	8636.45	7288.19	3797.56	1756.66	525.795	0	167.323	172.679	293.911	296.876	357.676	224.434	132.133	88.8797
[ID_154]_Venlafaxine_N-Oxide	Training	-0.019107	0	-2.5284	6.39281	49.928	51.4294	6	6	48	21	27	0	17	1	3	0	0	0	0	0	0	0	3444.02	3800.18	5611.84	5906.63	5906.12	6612.34	5417.41	3676.39	2394.17	8931.53	11518.6	17792.8	21360.5	21435.7	22255	21394.9	15939.7	9382.01	359.844	375.722	699.894	993.914	1134.46	1121.92	1165.99	1111.28
[ID_158]_3-Hydroxypyridine	Test	-2.18537	0	-0.4603	0.211876	2.5646	14.036	6	6	12	7	5	0	5	1	1	0	0	0	0	0	0	0	1178.56	1170.25	1410.85	1030.4	290.038	30.2662	1.01606	0	0	2732.71	3179.78	3918.64	3046.02	1173.04	258.918	31.0837	0	0	94.8483	95.6791	134.152	150.273	98.1256	30.0257	6.71846	0
[ID_161]_Bezafibrate	Test	-0.915236	1	0.5769	0.332814	44.8275	53.2639	12	12	45	25	20	0	19	1	4	0	0	0	1	0	0	1	5238.11	4568.01	6790.93	7130.46	5457.55	5077.31	5074.09	3930.05	3715.17	10281.3	12475.2	17730.5	19580.1	17386.5	15898.7	14513	12227.3	11509.9	353.323	358.85	598.763	808.202	845.24	716.392	713.047	590.876
[ID_167]_Indole-3-acrylic_acid	Training	-2.05603	1	-0.2991	0.0894608	20.7628	28.0651	9	10	23	14	9	0	11	1	2	0	0	0	0	0	0	0	2304.18	2422.71	3372.54	2929.93	2341.01	1889.31	1810.08	1068.25	488.205	5614.54	6878.3	9636.87	9433.85	7934.21	5938.98	4469.36	2862.21	1370.97	180.317	188.128	287.46	349.503	325.198	277.515	223.247	163.419
[ID_172]_Paraxanthine	Training	-2.41601	0	-1.1877	1.41063	21.897	22.9916	5	5	20	13	7	0	7	4	2	0	0	0	0	0	0	0	2313.68	2439.99	3711.66	3850.07	3150.38	1271.42	408.04	60.5737	0	4588.24	5465.75	8019.98	8618.17	6849.82	3780.41	2137.22	619.046	0	167.323	172.679	293.911	298.14	353.713	202.241	136.871	109.035
[ID_184]_1-(Carboxymethyl)cyclohexanecarboxylic_acid	Training	-1.67546	2	-1.5538	2.41429	40.0739	28.3831	0	0	27	13	14	0	9	0	4	0	0	0	0	0	0	0	2336.47	2244.57	3332.64	3528.83	3466.18	2795.22	715.088	83.7275	2.03213	5112.39	6563.44	9895.56	11776.9	10561.3	6937.3	2864.37	660.377	62.1675	215.33	212.354	382.694	576.233	652.432	534.378	287.816	92.0316
[ID_185]_1-Methylguanine	Training	-1.30488	0	-1.1472	1.31607	21.3591	21.5296	5	5	19	12	7	0	6	5	1	0	0	0	0	0	0	0	2109.65	2253.86	3371.37	3334.61	2510.83	933.136	171.496	8.12851	0	4191.65	5079.71	7336.54	7369.43	5840.45	3207.56	1387.12	248.67	0	156.632	166.129	266.089	284.184	287.391	222.416	112.933	53.7477
[ID_186]_1___3___7-Trimethyluric_acid	Training	-1.52553	0	-2.4505	6.00495	38.5455	26.8871	0	0	24	15	9	0	8	4	3	0	0	0	0	0	0	0	2715.95	2824.6	4465.55	5135.78	4356.2	2617.53	1006.49	115.051	0	5290.32	6318.97	9506.15	11238.8	10036.7	6911.99	3919.84	1051.59	0	201.652	205.719	360.768	384.71	499.111	350.286	303.667	177.759
[ID_192]_2-Hydroxycinnamic_acid	Test	-1.37627	1	-0.339	0.114921	20.0274	23.5803	6	6	20	12	8	0	9	0	3	0	0	0	0	0	0	0	2074.41	1979.77	2636.76	2377.22	1757.3	1555.07	1546.94	535.57	47.4093	4709.49	5572.29	7268.79	7189.96	5615.04	4344.26	3189.82	1585.93	372.015	161.668	159.614	228.539	289.134	265.551	216.657	176.738	121.156
[ID_196]_3-(4-Hydroxyphenyl)propionic_acid	Training	-2.54443	1	-0.6029	0.363488	19.1985	24.9139	6	6	22	12	10	0	9	0	3	0	0	0	0	0	0	0	2076.44	2003.98	2687.22	2296	1634.77	1553.12	1290.66	713.639	540.214	4771.66	5801.76	7789.9	7769.12	6008.69	4596.21	3356.74	1868.82	786.59	175.104	173.85	270.447	356.539	327.051	252.261	191.234	135.155
[ID_197]_3-Anisic_acid	Test	-2.29569	1	-0.2916	0.0850306	14.5351	21.8203	6	6	19	11	8	0	8	0	3	0	0	0	0	0	0	0	1930.15	1879.38	2483.39	2382.75	1851.07	1363.39	533.63	112.933	3.04819	4285.98	5060.71	6610.88	6695.52	5311.3	3558.44	1893.73	731.153	93.2512	154.127	152.214	233.979	254.484	257.101	221.908	132.296	90.8185
[ID_199]_3-Phenoxybenzoic_acid	Training	-1.22761	1	-0.3939	0.155157	8.8384	31.9539	12	12	26	16	10	0	13	0	3	0	0	0	0	0	0	0	2653.5	2769.18	3802.95	3609.46	2957.24	2722.26	2086.25	1847.17	1260.97	6465.73	7831.28	10565.5	10510.1	8558.23	7786.71	7192.61	5920.13	3834.61	205.266	211.692	321.898	407.894	365.311	300.841	278.478	253.408
[ID_200]_3-Phenyllactic_acid	Training	-2.80474	1	-0.7948	0.631707	17.9721	24.9139	6	6	22	12	10	0	9	0	3	0	0	0	0	0	0	0	2076.44	2003.98	2702.34	2596.64	1819.86	1774.49	1304.8	518.472	47.4093	4771.66	5801.76	7840.83	7880.97	6195.04	4969.72	3533.64	1629.89	372.015	175.104	173.85	273.199	368.102	339.039	261.082	211.789	129.486
[ID_204]_3___7-Dimethyluric_acid	Training	-1.45164	0	-2.5528	6.51679	32.8488	23.7936	0	0	21	14	7	0	7	4	3	0	0	0	0	0	0	0	2569.65	2634.16	4155.83	4422.78	3772.42	2061.91	653.858	57.5256	0	4804.63	5740.71	8534.44	9571.11	8230.41	4887.91	2043.83	525.795	0	180.675	183.875	314.931	338.772	400.713	305.071	144.271	88.8797
[ID_205]_4-Acetamidobenzoic_acid	Test	-2.21269	1	-0.8647	0.747706	20.0852	25.3471	6	6	22	13	9	0	9	1	3	0	0	0	0	0	0	0	2271.62	2182.08	3032.2	2774.17	2324.01	1629.94	1090.34	809.547	945.708	4983.89	5910.48	7828.28	8057.18	6695.59	4972.64	3168.74	2113.41	1528.27	178.588	175.541	269.103	329.869	314.913	261.195	192.323	126.527
[ID_207]_4-Hydroxyphenylpyruvic_acid	Training	-2.1549	1	-0.9291	0.863227	19.6791	24.3823	6	6	21	13	8	0	9	0	4	0	0	0	0	0	0	0	2330.38	2171.93	3022.11	2939.57	1984.76	1917.21	1486.8	937.353	554.309	4925.89	5875.02	7905.33	7986.8	6175.05	4782.41	3469.69	1921.18	806.436	175.019	169.648	255.325	333.225	314.682	235.927	179.101	129.565
[ID_208]_4-Oxo-6-(3-pyridyl)-2-thioxo-1___2___3___4-tetrahydropyrimidine-5-carbonitrile	Test	-1.22915	0	-0.31	0.0961	30.5015	28.3692	6	6	20	16	4	0	10	4	1	1	0	0	0	0	0	0	3515.3	2957.44	4352.07	4452.51	4601.4	3742.74	3077.03	1026.72	76.6816	6145.93	6899.62	9408.23	10117.2	8994.68	7732.78	5526.44	2183.84	392.145	165.181	168.344	253.17	287.688	281.671	225.464	213.416	90.7416
[ID_210]_5-Hydroxyindole-3-acetic_acid	Test	-1.24413	1	-1.0857	1.17874	17.6331	27.1071	9	10	23	14	9	0	10	1	3	0	0	0	0	0	0	0	2415.89	2474.62	3601.51	3231.46	2822.18	2494.2	1363.26	985.075	93.7581	5407.41	6724.79	9735.16	9850.6	8396.3	6085.95	3809.43	1909.88	555.889	186.128	192.975	299.588	379.76	369.215	317.847	233.852	147.932
[ID_223]_DL-Mandelic_acid	Training	-1.53805	1	-0.8572	0.734792	13.1067	21.8203	6	6	19	11	8	0	8	0	3	0	0	0	0	0	0	0	1930.15	1835.5	2508.63	2549.72	1843.02	1305.82	518.472	47.4093	1.01606	4285.98	5148.77	6927.29	6960.3	5320.89	3564.73	1629.89	372.015	31.0837	154.127	152.074	230.47	302.628	276.857	218.507	129.486	46.2154
[ID_226]_Equol	Training	-0.112265	0	-1.048	1.0983	19.0179	38.1411	12	12	32	18	14	0	15	0	3	0	0	0	0	0	0	0	2946.09	3254.42	4711.66	4842.27	3844.88	3130.97	2590.63	2090.01	1530.41	7437.1	9528.06	14107.6	15538.3	13321.8	10966.2	8802.66	6850.33	4820.5	247.221	265.138	438.908	597.867	618.515	539.476	411.931	322.565
[ID_227]_Epinephrine	Test	-2.70907	0	-1.7378	3.01995	24.8006	28.0143	6	6	26	13	13	0	9	1	3	0	0	0	0	0	0	0	2275.69	2238.54	3036.26	3333.74	2502.34	1948.81	1415.52	775.421	326.332	5108.23	6303.98	8734.79	9419.82	7969.66	6151.03	4445.54	2827.29	1394.28	205.461	208.718	328.883	431.774	449.719	385.496	288.492	222.842
[ID_229]_Fexofenadine	Training	-0.290039	1	-1.9916	3.96647	63.1579	86.6329	18	18	76	37	39	0	32	1	4	0	0	0	0	0	0	0	5876.15	6518.32	9630.88	11380.7	11030.5	10263.3	8806.19	7842.61	6713.73	15873.7	20526.6	31131.3	38322.8	39960.9	38813.7	34788.6	29810.4	25607.4	566.925	599.933	1058.78	1536.37	1872.12	1920.44	1779.26	1576.02
[ID_230]_Hippuric_acid	Test	-1.06035	1	-1.0764	1.15864	19.2228	25.3471	6	6	22	13	9	0	9	1	3	0	0	0	0	0	0	0	2271.62	2182.08	2902.27	2679.69	2152.75	2020.37	1374.99	1067.26	489.221	4983.89	5910.48	7733.78	7602.85	6051.32	4996.79	4066.33	2921.06	1402.06	178.588	175.541	270.571	341.906	298.141	236.007	201.465	168.976
[ID_236]_N-(2-Morpholinoethyl)-4-(1H-pyrazol-1-yl)benzamide	Test	-0.313298	0	-0.6929	0.48011	43.1298	47.4999	11	12	42	22	20	0	16	4	2	0	0	0	0	0	0	0	3625.27	4093.92	5509.99	5154.83	4538.91	3832.38	3428.19	3529.56	3395.69	8803.98	11068.8	15709.9	16480.2	15269.7	13211.6	10976.4	10127.7	10007	322.528	344.469	606.171	751.861	736.652	719.685	567.923	479.878
[ID_239]_N-Acetyl-DL-tryptophan	Test	-1.63185	1	-1.3798	1.90385	31.5734	36.8211	9	10	32	18	14	0	13	2	3	0	0	0	0	0	0	0	3049.95	3158.16	4540.71	4393.21	4102.87	4154.08	3537.43	2773.85	1532.31	7076.69	8792.48	12570.1	13415.3	12860.8	11396	9764.56	7737.77	5176.4	252.544	259.994	427.993	556.811	573.779	551.464	508.331	387.495
[ID_240]_N-Acetyl-L-phenylalanine	Training	-1.40873	1	-0.9594	0.920448	28.2734	31.5343	6	6	28	15	13	0	11	1	3	0	0	0	0	0	0	0	2564.21	2519.03	3432.72	3261	3063.27	3388.11	2429.87	1489.96	531.152	5955.26	7216.46	9711.26	10327	9581.71	8917.61	7310.37	4915.5	2481.42	220.542	219.092	356.123	470.705	470.41	438.754	407.686	281.257
[ID_241]_N-Acetyl-L-tyrosine	Training	-1.31786	1	-1.4197	2.01555	30.838	32.3363	6	6	29	16	13	0	11	1	4	0	0	0	0	0	0	0	2820.18	2715.22	3804.94	3675.55	3299.79	3582.31	2652.26	1909.24	1233.24	6171.65	7486.47	10202	11034.3	10163.2	9282.51	7714.96	5473.82	3221.88	233.894	231.48	369.073	496.278	506.504	462.225	423.225	310.873
[ID_242]_N2-[2-(2-Pyridyl)ethyl]-4-hydroxyquinazoline-2-carboxamide	Test	-1.43158	0	-1.4111	1.9912	25.2068	42.8323	12	12	35	22	13	0	16	4	2	0	0	0	0	0	0	0	3618.15	3909.33	5486.44	5681.1	4821.86	4166.38	3506.35	3285.93	2857.55	8586.4	10566.6	14679.6	15318.3	13036.5	11037.7	9634.98	9134.4	8467.09	275.498	289.491	471.486	593.562	546.862	489.907	413.193	374.382
[ID_249]_Theophylline	Training	-1.98845	0	-1.9576	3.8322	22.0188	23.6583	5	5	21	13	8	0	7	4	2	0	0	0	0	0	0	0	2314.7	2454.11	3735.88	4093.45	3318.51	1278.03	189.71	3.04819	0	4619.33	5552.72	8249.45	9051.18	7822.05	4564.95	1689.42	93.2512	0	174.041	180.958	308.147	331.519	395.301	257.826	221.595	20.1554
[ID_255]_3-Indoxyl_sulphate	Test	-2.62291	1	-0.9295	0.86397	15.5696	25.9556	9	10	21	14	7	0	8	1	4	1	0	0	0	0	0	0	3409.14	3825.25	4432.18	3553.58	3610.8	3048.91	1757.98	731.817	62.5202	5311.38	6512.97	9090.01	8500.89	7458.92	5655.7	3606.38	1828.11	422.945	179.706	184.457	304.253	321.089	293.197	282.987	199.338	122.265
[ID_256]_3-Methylxanthine	Training	-3.50704	0	-1.7236	2.9708	16.6023	19.898	5	5	17	12	5	0	6	4	2	0	0	0	0	0	0	0	2167.39	2249.55	3401.94	3323.97	2686.3	802.1	86.7313	0	0	4102.56	4887.5	7048.27	7012.77	5556.82	2412.16	596.571	0	0	146.345	150.835	248.074	252.434	268.432	145.502	87.6666	0
[ID_258]_4'-Hydroxydiclofenac	Training	-0.290677	1	0.4029	0.162328	28.8643	39.8407	12	12	31	20	11	0	14	1	3	0	0	0	2	0	0	2	5508.38	3927.48	5952.12	6817.89	7723.59	5594.33	5681.32	4432.35	4168.57	8171.59	9572.32	13661.4	15051.9	14178.5	12950.1	12555.8	10275.5	6505.48	253.878	256.457	396.459	533.494	534.068	491.273	453.771	424.82
[ID_266]_Indole-3-lactic_acid	Training	-2.16863	1	-1.2152	1.47671	21.2721	30.2007	9	10	26	15	11	0	11	1	3	0	0	0	0	0	0	0	2562.18	2643.1	3810.33	3728.86	2859.47	2566.36	2280.15	1319.93	518.472	5893.09	7377.78	10699.6	10969.2	9474.16	7439.2	5763.28	3651.69	1629.89	207.106	214.751	345.07	454.208	442.408	374.069	312.044	226.786
[ID_267]_L-Tyrosine	Training	-1.38429	1	-1.5447	2.3861	22.1942	26.6807	6	6	24	13	11	0	9	1	3	0	0	0	0	0	0	0	2273.65	2188.35	3037.82	2944.74	2052.92	1942.05	1525.49	949.889	585.571	5046.06	6181.97	8518.89	8903.16	7158.98	5641.64	4258.06	2370.07	1006.5	192.025	192.06	296.267	407.62	410.911	300.595	251.352	178.464
[ID_271]_N-Acetylanthranilic_acid	Test	-0.733787	1	-0.8647	0.747706	20.0852	25.3471	6	6	22	13	9	0	9	1	3	0	0	0	0	0	0	0	2271.62	2182.08	3032.2	2917.2	2883.2	2224.79	1473.81	196.664	6.09638	4983.89	5910.48	7828.28	8207.57	7382.92	6177.11	3916.44	1447.38	186.502	178.588	175.541	269.103	329.962	320.134	302.658	248.906	158.387
[ID_275]_Uric_acid	Training	-2.80903	0	-2.5528	6.51679	32.8488	23.7936	0	0	21	14	7	0	7	4	3	0	0	0	0	0	0	0	2569.65	2634.16	4155.83	4470.68	3700.5	2101.06	644.824	51.4292	0	4804.63	5740.71	8534.44	9450.32	8240.8	5217.84	2010.8	339.292	0	180.675	183.875	314.931	341.265	396.933	296.954	193.986	48.5689
[truncated: 2,829 more columns]

## Sheet: Taˣ+Nt
Name	Status	LogBT.Eq2	nAcid	ALogP	ALogp2	AMR	apol	naAromAtom	nAromBond	nAtom	nHeavyAtom	nH	nB	nC	nN	nO	nS	nP	nF	nCl	nBr	nI	nX	ATS0m	ATS1m	ATS2m	ATS3m	ATS4m	ATS5m	ATS6m	ATS7m	ATS8m	ATS0v	ATS1v	ATS2v	ATS3v	ATS4v	ATS5v	ATS6v	ATS7v	ATS8v	ATS0e	ATS1e	ATS2e	ATS3e	ATS4e	ATS5e	ATS6e	ATS7e
[ID_2]_Tramadol	Training	-0.0210438	0	-0.9385	0.880782	48.7166	47.5338	6	6	44	19	25	0	16	1	2	0	0	0	0	0	0	0	3041.76	3407.6	4841.64	5538.53	5362.04	5209.34	4002.67	2550.98	1463.87	8229.46	10636.1	15971.1	19481	19771.1	19123.2	16872.4	12264.2	7487.27	325.515	342.275	627.063	842.637	1042.05	1000.24	982.878	855.968
[ID_4]_oxazepam	Training	-0.0492458	0	-0.3188	0.101633	25.4206	39.7187	12	12	31	20	11	0	15	2	2	0	0	0	1	0	0	1	4336.17	3786.24	5706.94	6641.96	5906.77	6268.84	5517.86	3959.71	1064.17	8118.06	9905.86	14425	16780.9	15506	15277.9	13746.8	8933.76	3386.02	246.193	259.609	418.491	571.18	549.62	524.926	554.565	463.036
[ID_6]_carbamazepine-10___11-epoxide	Training	-0.0480314	0	-0.8826	0.778983	18.3575	38.2055	12	12	31	19	12	0	15	2	2	0	0	0	0	0	0	0	3080.48	3562.72	5030.84	6203.38	6286.66	5500.09	2847.27	762.771	83.8192	7645.17	9866.28	14204.9	17608.5	17785.6	16222.5	10078.8	4428.39	1030.34	240.836	266.026	429.294	573.711	625.372	655.962	556.76	332.832
[ID_7]_4-hydroxy-1H-benzotriazole	Training	-0.0695604	0	-0.8807	0.775632	5.8646	17.996	9	10	15	10	5	0	6	3	1	0	0	0	0	0	0	0	1715.22	1853.18	2566.51	2218.11	1502.94	129.12	2.03213	0	0	3642.85	4485.67	6320.8	5497.01	3509.87	957.619	62.1675	0	0	122.792	132.325	193.357	217.627	192.055	100.253	13.4369	0
[ID_8]_sotalol	Training	-0.0843891	0	-1.7015	2.8951	46.0083	41.9619	6	6	38	18	20	0	12	2	3	1	0	0	0	0	0	0	3939.63	4249.7	4942.71	4574.76	4370.6	3840.17	2879.57	2754.86	2567.49	7436.46	9309.91	12925.9	13923.3	13057.6	11820.2	9661.24	8127.92	6998.04	294.058	297.954	523.493	686.067	678.527	643.847	555.878	428.564
[ID_9]_propranolol	Training	-0.0372993	0	-1.0098	1.0197	35.5013	44.8667	10	11	40	19	21	0	16	1	2	0	0	0	0	0	0	0	3037.7	3337.21	4536.47	4676.58	3954.34	3604.36	3075.93	2688.42	2254.59	8105.12	10251.9	14412.4	15537.8	13911.9	12589.8	11232.5	9604.97	8430.03	298.641	313.736	539.855	715.44	714.4	624.693	611.396	572.764
[ID_10]_hydrochlorothiazide	Training	-0.103529	0	-1.5436	2.3827	35.4327	32.1423	6	6	25	17	8	0	7	3	4	2	0	0	1	0	0	1	5942.83	5620.98	7073.13	8071.21	7954.13	6595.22	5043.15	866.663	121.025	6506.32	7977.95	12113	13744.7	11991.9	8503.39	5766.54	2501.93	855.795	220.106	221.032	390.644	488.447	497.475	389.436	306.303	178.617
[ID_11]_fluconazole	Training	-0.0831251	0	0.2638	0.0695904	21.833	39.3975	16	16	34	22	12	0	13	6	1	0	0	2	0	0	0	2	4042.65	4171	6088.54	5769.74	6773.52	6592.77	6491.66	5226.79	2618.41	7909.09	9702.88	14265.5	14997.4	15684.7	16034.8	15030.2	11936.1	6428.66	285.21	295.742	489.195	607.754	710.597	727.144	697.176	564.501
[ID_12]_venlafaxine	Training	-0.0575951	0	-1.2265	1.5043	51.6282	50.6274	6	6	47	20	27	0	17	1	2	0	0	0	0	0	0	0	3188.06	3576.08	5035.35	5585.45	5505.66	5587.72	4535.86	3195.3	2105.95	8715.14	11289.1	16884.6	20401.6	20748.2	20827.7	19609.8	14842.2	9001.59	346.492	364.051	669.793	908.111	1104.92	1068.43	1059.56	1034.39
[ID_13]_metoprolol	Training	-0.0835987	0	-0.7944	0.631071	51.9811	46.5758	6	6	44	19	25	0	15	1	3	0	0	0	0	0	0	0	3153.46	3337.17	4237.3	4197.35	3590.21	3685.13	3176.23	2451.31	2248.05	8022.33	10045.8	13586.6	14579.8	13463.7	12555.6	11325	9291.7	8219.19	331.326	339.653	600.675	748.881	781.115	700.431	644.657	598.335
[ID_14]_gabapentin	Training	-0.0913542	1	-2.0523	4.21194	41.7889	29.8795	0	0	29	12	17	0	9	1	2	0	0	0	0	0	0	0	2023.78	2064.81	2927.18	2953.24	2830.26	2070.18	715.205	86.7757	2.03213	5016.17	6600.38	9975.03	11769.1	10651.2	7274.87	3222.78	753.629	62.1675	218.984	222.379	409.393	609.568	699.24	617.893	349.07	112.187
[ID_15]_furosemide	Training	-0.217169	1	-0.9949	0.989826	33.6078	39.7447	11	11	32	21	11	0	12	2	5	1	0	0	1	0	0	1	5699.12	5121.05	6755.92	7445.25	7837.75	6229.29	6570.95	4467.08	3688.59	8093.45	9722.2	13926.9	14795.9	14391.8	12734.9	11341.5	9365.93	7238.12	272.371	273.47	443.158	544.989	570.221	554.046	497.937	409.929
[ID_16]_diclofenac	Training	-0.193074	1	0.8632	0.745114	26.2997	39.0387	12	12	30	19	11	0	14	1	2	0	0	0	2	0	0	2	5252.41	3731.29	5579.9	6403.34	6454.43	5300.77	5472.03	4059.12	3589.08	7955.2	9302.32	13170.7	14344.5	13288.7	12442.5	12229.9	9753.72	5661.1	240.527	244.07	383.509	507.921	496.099	462.749	439.823	405.151
[ID_18]_atenolol	Training	-0.571379	0	-1.6098	2.59146	47.492	43.9154	6	6	41	19	22	0	14	2	3	0	0	0	0	0	0	0	3202.35	3280.95	4401.69	4217.21	3695.64	3714.84	3011.53	2424.22	2189.74	7748.88	9664.32	13210.2	14117.2	12816.9	11869.5	10284.5	8183.03	7641.31	313.832	319.359	546.065	723.149	727.855	630.912	612.198	527.38
[ID_20]_valsartan	Training	-0.541211	3	-1.3575	1.84281	56.5347	69.483	17	19	61	32	29	0	24	5	3	0	0	0	0	0	0	0	5240.69	5681.48	7947.6	8621.78	9819.89	10195.7	8754	7150.29	5646.56	12931.6	16250.9	23359.6	27083	29645.6	31103.5	29435.9	25825	21364.8	466.871	487.918	831.138	1085.95	1267.9	1359.76	1393.86	1294.27
[ID_21]_ketoprofen	Training	-0.700057	1	-0.2088	0.0435974	21.9194	39.9011	12	12	33	19	14	0	16	0	3	0	0	0	0	0	0	0	3090.35	3202.5	4504.16	4879.65	4392.29	3949.99	3301.84	2708.16	1925.87	7860.62	9681.57	13706.3	15204.3	13885.9	12433.2	10717.4	8633.26	6637.99	254.762	260.291	417.475	554.843	583.462	522.042	457.406	400.422
[ID_22]_metoprolol_acid	Training	-0.740645	1	-1.2148	1.47574	47.2698	42.9507	6	6	40	19	21	0	14	1	4	0	0	0	0	0	0	0	3261.1	3292.77	4444.36	4216.92	3729.35	3742.49	3013.23	2441.95	2197.54	7690.87	9554.12	13033	13892.3	12603.4	11593.5	9964.7	7993.06	7541.02	310.263	313.536	535.173	710.208	709.827	621.587	588.174	508.506
[ID_24]_sulfamethoxazole	Training	-1.00393	0	-1.401	1.9628	22.7153	33.5407	11	11	28	17	11	0	10	3	3	1	0	0	0	0	0	0	3838.15	4218.56	5410.03	5164.06	4614.31	3805.27	2894.76	1817.24	1183.1	6552.98	8088.17	11351	11305.5	9860.3	8004.31	6909.77	5878.86	3917.54	228.712	236.834	382.793	451.11	472.198	367.362	274.76	307.856
[ID_27]_acesulfame	Training	-1.10403	0	-0.6738	0.454006	32.737	17.582	0	0	15	10	5	0	4	1	4	1	0	0	0	0	0	0	2830.05	3035.75	3575.71	2968.36	2078.72	231.861	3.04819	0	0	3555.14	4202.06	5566.58	5324.51	3611.91	1277.79	93.2512	0	0	136.107	130.069	227.458	232.667	184.998	136.137	20.1554	0
[ID_30]_caffeine	Training	-2.92082	0	-1.4217	2.02123	27.3135	26.7519	5	5	24	14	10	0	8	4	2	0	0	0	0	0	0	0	2460.99	2644.55	4045.6	4595.61	3920.83	1807.6	541.257	69.7183	0	5105.01	6130.97	9221.17	10674.9	9553.42	6259.13	3444.68	898.8	0	195.019	202.803	353.984	375.961	484.545	337.181	288.612	169.501
[ID_35]_1-Aminocyclohexanecarboxylic_acid	Training	-2.72824	1	-1.6274	2.64843	31.3828	23.6923	0	0	23	10	13	0	7	1	2	0	0	0	0	0	0	0	1731.19	1727.85	2583.68	2738.83	1611.8	636.578	84.7436	2.03213	0	4044.8	5294.4	7998.46	8913.49	6415.18	2807.76	691.461	62.1675	0	177.029	178.827	324.072	489.45	515.091	302.907	98.75	13.4369
[ID_36]_1-Methyluric_acid	Test	-1.79518	0	-2.3188	5.37683	27.4323	20.0332	0	0	17	13	4	0	6	4	3	0	0	0	0	0	0	0	2422.34	2429.6	3821.9	3725.14	2917.95	1526.05	538.918	51.4292	0	4287.87	5075.49	7333.25	7393.64	5422.45	2881.39	1238.97	339.292	0	152.979	153.751	254.858	263.443	258.983	146.483	76.6927	48.5689
[ID_38]_1___7-Dimethyluric_acid	Training	-1.55262	0	-2.2165	4.91287	33.129	23.1268	0	0	20	14	6	0	7	4	3	0	0	0	0	0	0	0	2568.63	2620.04	4131.62	4390.24	3585.75	1901.3	827.938	105.907	0	4773.55	5653.75	8304.97	9182.15	7333.09	4245.27	2459.59	771.835	0	173.956	175.596	300.695	306.888	368.279	212.43	143.668	117.293
[ID_39]_10-Hydroxycarbazepine	Training	-2.72403	0	-1.076	1.15778	20.7705	39.5391	12	12	33	19	14	0	15	2	2	0	0	0	0	0	0	0	3082.51	3398.79	5052.06	6106.03	6372.45	5791.17	3152.44	827.348	86.8674	7707.34	9760.3	14498.2	18105.7	18687	17572.4	11392.7	4980.62	1123.59	254.273	272.581	447.894	631.645	694.159	748.618	669.914	407.482
[ID_44]_2-[4-(3-Amino-2-hydroxypropoxy)phenyl]acetamide	Training	-1.21517	0	-1.9915	3.96607	33.2188	34.6347	6	6	32	16	16	0	11	2	3	0	0	0	0	0	0	0	2763.46	2753.55	3660.63	3573.55	2937.37	2694.37	2227.73	1744.22	1229.33	6291.83	7780.09	10560.9	11022.1	9566.14	8426.58	7139.6	5552.11	4244.48	250.9	253.963	414.63	546.086	518.882	433.133	379.532	326.576
[ID_46]_2-Phenylbenzimidazole-5-sulfonic_acid	Training	-0.0270344	1	-0.9619	0.925252	14.2194	37.0539	15	17	29	19	10	0	13	2	3	1	0	0	0	0	0	0	4073.73	4599.35	5878.64	5410.88	4746.86	4178.85	3352.91	2438.26	2415.56	7549.14	9457.44	13709.9	13849.1	11926.7	9914.86	8686.79	6678.76	5389.89	234.414	248.335	405.653	486.383	489.129	399.375	335.528	261.174
[ID_55]_3___5-Dimethyl-1-phenylpyrazole	Test	-1.13723	0	0.8922	0.796021	14.363	29.5615	11	12	25	13	12	0	11	2	0	0	0	0	0	0	0	0	1991.49	2288.84	3180.81	2815.25	2304.53	1813.68	1031.18	340.095	58.589	5518.32	6818.35	9376.02	9220.49	8329.22	7324.14	5371.92	2579.74	769.784	183.971	197.331	322.77	365.809	372.69	292.85	323.901	208.363
[ID_63]_6-Aminocaproic_acid	Test	-1.64922	1	-1.8073	3.26633	29.4376	21.9323	0	0	22	9	13	0	6	1	2	0	0	0	0	0	0	0	1586.93	1439.32	1674.17	1320.37	1109.52	912.765	716.008	555.122	80.6592	3621.29	4447.37	5606.83	5353.22	4326.57	3319.78	2312.98	1317.68	477.188	169.488	163.746	278.691	370.743	311.823	248.939	186.054	122.89
[ID_64]_6-Methyl[1___2___4]triazolo[4___3-b]pyridazin-8-ol	Test	-2.18076	0	0.0214	0.00045796	21.4526	19.096	5	5	16	11	5	0	6	4	1	0	0	0	0	0	0	0	1911.42	2063.34	2959.74	2624.48	1904.21	524.067	88.7786	0	0	3886.17	4662.16	6516.12	5839.62	4399.72	2089.67	646.132	0	0	132.994	140.041	221.871	229.645	189.481	127.764	76.5469	0
[ID_66]_7-Methylguanine	Training	-2.32035	0	-0.3773	0.142355	21.2373	20.8628	5	5	18	12	6	0	6	5	1	0	0	0	0	0	0	0	2108.63	2239.74	3347.16	3089.22	2627.17	768.853	271.131	68.6035	6.09638	4160.57	4992.75	7107.07	6964.19	5512.25	2606.83	1155.59	552.539	186.502	149.914	157.85	251.854	249.644	258.443	179.202	69.1954	52.5087
[ID_67]_7-Methylxanthine	Training	-2.5272	0	-0.9537	0.909544	16.4805	19.2312	5	5	16	12	4	0	6	4	2	0	0	0	0	0	0	0	2166.37	2235.43	3377.73	3080.59	2662.44	735.975	244.612	48.381	0	4071.47	4800.53	6818.8	6579.76	5008.1	2007.26	728.953	246.041	0	139.627	142.556	233.838	219.055	234.385	132.2	40.8579	28.4135
[ID_71]_Acridine	Test	-2.50197	0	0	0	0	29.9811	14	16	23	14	9	0	13	1	0	0	0	0	0	0	0	0	2080.77	2465.14	3487.63	3450.11	2386.48	1670.69	1063.36	439.91	54.5247	6028.79	7603.89	10972.6	11266	8640.29	6431.39	4501.22	2410.38	645.449	168.695	187.167	298.93	377.958	332.085	246.156	185.999	140.803
[ID_72]_Acycloguanosine	Training	-1.67599	0	-1.0653	1.13486	33.3826	28.6539	5	5	26	16	10	0	8	5	3	0	0	0	0	0	0	0	2913.16	3012.94	4243.02	4172.92	3756.04	2583.46	2196.69	1667.37	1115.7	5564.72	6750.67	9344.3	9286.83	8227.3	6717.37	5787.4	4313.9	3070.27	218.572	226.317	375.269	400.153	390.581	326.602	320.381	248.25
[ID_75]_Azobenzene	Training	-0.518883	0	0	0	0	29.9879	12	12	24	14	10	0	12	2	0	0	0	0	0	0	0	0	2133.72	2384.91	2982.74	2662.5	1828.64	1627.8	1616.16	1376.1	778.898	5879.67	7114.9	9303	8423.97	5711.9	5135.23	5785.94	5577.73	3778.52	178.074	189.406	285.463	352.165	273.941	182.883	177.374	215.315
[ID_76]_Benzophenone	Training	-0.346146	0	-0.2638	0.0695904	5.346	30.3499	12	12	24	14	10	0	13	0	1	0	0	0	0	0	0	0	2141.56	2332.93	3078.96	3087.05	2501.86	2065.04	1408.36	778.898	249.249	6032.95	7379.33	10100	10142.5	8088.07	6899.33	5741.76	3778.52	1590.08	178.563	186.777	290.609	370.274	335.29	259.878	234.258	197.792
[ID_86]_Climbazole	Training	-0.0581216	0	2.0334	4.13472	37.8013	43.7195	11	11	37	20	17	0	15	2	2	0	0	0	1	0	0	1	4342.27	3780.46	5672.17	5800.79	5258.61	5422.23	5076.09	3888.89	3014.81	8304.56	10008	14588.1	15763.6	14457.4	14860.3	16606.3	14082.1	8373.09	286.504	294.984	506.852	644.611	771.465	617.437	618.018	753.867
[ID_93]_Dibenzylamine	Training	-0.24054	0	-0.3972	0.157768	12.7244	35.7419	12	12	30	15	15	0	14	1	0	0	0	0	0	0	0	0	2231.13	2539.79	3162.26	2876.38	2122.81	1829.68	1705.06	1670.73	1380.17	6638.81	8264.54	11235	11099.2	8660.3	7399.57	6971.7	6611.27	5702.06	216.546	231.034	377.341	476.661	468.88	375.064	327.576	270.707
[ID_104]_Guaifenesin	Test	-1.13305	0	-1.1537	1.33102	26.8864	30.1431	6	6	28	14	14	0	10	0	4	0	0	0	0	0	0	0	2480.74	2484.64	3163.5	3456.32	2633.14	2158.81	2127.85	1619.88	653.679	5535.9	6745.38	8880.8	9115.36	8003.99	7406.13	6683.73	5099.55	2898.32	222.871	224.881	371.379	445.889	422.508	371.507	357.352	346.773
[ID_109]_Indole-3-butyric_acid	Training	-2.64533	1	-0.851	0.724201	22.8455	32.4923	9	10	28	15	13	0	12	1	2	0	0	0	0	0	0	0	2452.51	2615.4	3616.71	3210.42	2634.6	1973.06	1907.51	1849.45	1083.41	6162.39	7760.77	11071.5	11156.9	9713.11	7637.81	6240.22	4906.83	3070.2	214.731	224.139	372.097	479.957	457.211	402.507	324.943	264.755
[ID_110]_Indole-3-pyruvic_acid	Training	-2.82188	1	-0.8892	0.790677	20.4145	28.8671	9	10	24	15	9	0	11	1	3	0	0	0	0	0	0	0	2560.15	2614.87	3757.88	3657.23	2787.84	2501.78	2214.56	1279.55	503.316	5830.93	7181.03	10273.4	10367.8	8872.67	6831.12	5124.11	3183.15	1421.9	193.669	198.162	314.246	393.758	381.958	323.883	255.139	178.559
[ID_111]_Isoprenaline	Test	-0.480304	0	-1.7879	3.19659	34.2992	34.2015	6	6	32	15	17	0	11	1	3	0	0	0	0	0	0	0	2568.28	2575.5	3588.66	3783.69	2898.9	2672.21	2141.83	1499.79	1122.38	6079.6	7609.96	10637.5	11601.4	10076.5	8438.75	7214.97	5960.36	4370.43	247.416	252.27	414.504	566.107	595.644	511.593	430.825	351.852
[ID_114]_L-threo-3-Phenylserine	Test	-1.4948	1	-1.6575	2.74731	20.7267	26.6807	6	6	24	13	11	0	9	1	3	0	0	0	0	0	0	0	2273.65	2188.35	3052.93	3320.68	2768.09	2033.78	1333.37	531.619	48.4253	5046.06	6181.97	8569.82	9213.8	7888.21	6135.36	4112.39	1842.83	403.099	192.025	192.06	299.02	417.894	435.772	348.35	265.839	155.567
[ID_115]_Losartan	Training	-0.470133	2	-1.1233	1.2618	38.9227	63.6382	22	24	53	30	23	0	22	6	1	0	0	0	1	0	0	1	5887.03	5698.25	8153.78	8631.9	9192.37	8833.69	8243.69	6589.04	4838.83	12212.5	15214	22047.8	24365.1	25707.7	26026	24488.6	20412.3	15915.7	407.053	437.147	732.364	895.145	1000.71	1044.96	1023.18	983.065
[ID_118]_Methyl_indole-3-acetate	Training	-2.562	0	-0.3744	0.140175	19.8376	29.3987	9	10	25	14	11	0	11	1	2	0	0	0	0	0	0	0	2306.21	2490.8	3412.88	3161.42	2659.75	2205.61	1586.59	893.765	279.471	5676.7	7019.71	9892.51	10017	8744.08	6455.19	4724.96	3229.49	1691.94	193.754	202.503	335.63	376.525	383.945	350.178	241.853	195.521
[ID_124]_Oxybenzone	Training	-0.554146	0	-0.7759	0.602021	15.2264	35.0475	12	12	29	17	12	0	14	0	3	0	0	0	0	0	0	0	2799.79	2937.66	4006.99	4381.73	3989.77	3105.08	2487.94	1751.33	1042.07	6951.41	8484.27	11729.5	12656	11213.8	9654.73	8024.28	5899.71	3733.04	226.244	233.468	365.501	443.782	460.152	418.984	357.926	298.801
[ID_131]_Phenacetin	Test	-0.598222	0	-0.4263	0.181732	24.4755	28.9723	6	6	26	13	13	0	10	1	2	0	0	0	0	0	0	0	2163.98	2226.49	2908.88	2592.6	2208.59	1817.07	1123.66	885.815	609.784	5315.35	6402.15	8238.41	8275.06	7467.61	6657.13	4582.14	2613.74	2063.08	199.65	201.658	332.532	388.419	324.078	327.613	307.946	186.7
[ID_140]_PV9	Test	-0.0374741	0	-2.3492	5.51874	47.2711	51.5854	6	6	47	20	27	0	18	1	1	0	0	0	0	0	0	0	3076.35	3476.26	4594.38	4661.24	4788.92	4849.86	4320.05	3691.91	2697.45	8922.27	11563.4	16560.3	17754.7	17467.4	18071	18048.6	16751.3	13404.4	340.681	356.711	662.505	907.701	884.156	896.592	919.05	914.64
[ID_146]_Sulfapyridine	Training	-0.363934	0	-1.6864	2.84394	15.3637	34.4987	12	12	28	17	11	0	11	3	2	1	0	0	0	0	0	0	3726.45	4114.8	5157.35	5229.34	4481.42	3669.21	2821.02	1673.11	1131.23	6760.11	8300.51	11513	11902.2	10005.3	8489.5	7374.31	6087.3	4228.11	222.901	231.44	370.131	460.535	460.441	377.16	293.127	274.512
[ID_147]_Theobromine	Training	-1.90027	0	-1.1877	1.41063	21.897	22.9916	5	5	20	13	7	0	7	4	2	0	0	0	0	0	0	0	2313.68	2439.99	3711.66	3826.14	3288.62	1199.51	368.684	57.5256	0	4588.24	5465.75	8019.98	8636.45	7288.19	3797.56	1756.66	525.795	0	167.323	172.679	293.911	296.876	357.676	224.434	132.133	88.8797
[ID_154]_Venlafaxine_N-Oxide	Training	-0.019107	0	-2.5284	6.39281	49.928	51.4294	6	6	48	21	27	0	17	1	3	0	0	0	0	0	0	0	3444.02	3800.18	5611.84	5906.63	5906.12	6612.34	5417.41	3676.39	2394.17	8931.53	11518.6	17792.8	21360.5	21435.7	22255	21394.9	15939.7	9382.01	359.844	375.722	699.894	993.914	1134.46	1121.92	1165.99	1111.28
[ID_161]_Bezafibrate	Test	-0.915236	1	0.5769	0.332814	44.8275	53.2639	12	12	45	25	20	0	19	1	4	0	0	0	1	0	0	1	5238.11	4568.01	6790.93	7130.46	5457.55	5077.31	5074.09	3930.05	3715.17	10281.3	12475.2	17730.5	19580.1	17386.5	15898.7	14513	12227.3	11509.9	353.323	358.85	598.763	808.202	845.24	716.392	713.047	590.876
[ID_167]_Indole-3-acrylic_acid	Training	-2.05603	1	-0.2991	0.0894608	20.7628	28.0651	9	10	23	14	9	0	11	1	2	0	0	0	0	0	0	0	2304.18	2422.71	3372.54	2929.93	2341.01	1889.31	1810.08	1068.25	488.205	5614.54	6878.3	9636.87	9433.85	7934.21	5938.98	4469.36	2862.21	1370.97	180.317	188.128	287.46	349.503	325.198	277.515	223.247	163.419
[ID_172]_Paraxanthine	Training	-2.41601	0	-1.1877	1.41063	21.897	22.9916	5	5	20	13	7	0	7	4	2	0	0	0	0	0	0	0	2313.68	2439.99	3711.66	3850.07	3150.38	1271.42	408.04	60.5737	0	4588.24	5465.75	8019.98	8618.17	6849.82	3780.41	2137.22	619.046	0	167.323	172.679	293.911	298.14	353.713	202.241	136.871	109.035
[ID_184]_1-(Carboxymethyl)cyclohexanecarboxylic_acid	Training	-1.67546	2	-1.5538	2.41429	40.0739	28.3831	0	0	27	13	14	0	9	0	4	0	0	0	0	0	0	0	2336.47	2244.57	3332.64	3528.83	3466.18	2795.22	715.088	83.7275	2.03213	5112.39	6563.44	9895.56	11776.9	10561.3	6937.3	2864.37	660.377	62.1675	215.33	212.354	382.694	576.233	652.432	534.378	287.816	92.0316
[ID_185]_1-Methylguanine	Training	-1.30488	0	-1.1472	1.31607	21.3591	21.5296	5	5	19	12	7	0	6	5	1	0	0	0	0	0	0	0	2109.65	2253.86	3371.37	3334.61	2510.83	933.136	171.496	8.12851	0	4191.65	5079.71	7336.54	7369.43	5840.45	3207.56	1387.12	248.67	0	156.632	166.129	266.089	284.184	287.391	222.416	112.933	53.7477
[ID_186]_1___3___7-Trimethyluric_acid	Training	-1.52553	0	-2.4505	6.00495	38.5455	26.8871	0	0	24	15	9	0	8	4	3	0	0	0	0	0	0	0	2715.95	2824.6	4465.55	5135.78	4356.2	2617.53	1006.49	115.051	0	5290.32	6318.97	9506.15	11238.8	10036.7	6911.99	3919.84	1051.59	0	201.652	205.719	360.768	384.71	499.111	350.286	303.667	177.759
[ID_199]_3-Phenoxybenzoic_acid	Training	-1.22761	1	-0.3939	0.155157	8.8384	31.9539	12	12	26	16	10	0	13	0	3	0	0	0	0	0	0	0	2653.5	2769.18	3802.95	3609.46	2957.24	2722.26	2086.25	1847.17	1260.97	6465.73	7831.28	10565.5	10510.1	8558.23	7786.71	7192.61	5920.13	3834.61	205.266	211.692	321.898	407.894	365.311	300.841	278.478	253.408
[ID_204]_3___7-Dimethyluric_acid	Training	-1.45164	0	-2.5528	6.51679	32.8488	23.7936	0	0	21	14	7	0	7	4	3	0	0	0	0	0	0	0	2569.65	2634.16	4155.83	4422.78	3772.42	2061.91	653.858	57.5256	0	4804.63	5740.71	8534.44	9571.11	8230.41	4887.91	2043.83	525.795	0	180.675	183.875	314.931	338.772	400.713	305.071	144.271	88.8797
[ID_208]_4-Oxo-6-(3-pyridyl)-2-thioxo-1___2___3___4-tetrahydropyrimidine-5-carbonitrile	Test	-1.22915	0	-0.31	0.0961	30.5015	28.3692	6	6	20	16	4	0	10	4	1	1	0	0	0	0	0	0	3515.3	2957.44	4352.07	4452.51	4601.4	3742.74	3077.03	1026.72	76.6816	6145.93	6899.62	9408.23	10117.2	8994.68	7732.78	5526.44	2183.84	392.145	165.181	168.344	253.17	287.688	281.671	225.464	213.416	90.7416
[ID_210]_5-Hydroxyindole-3-acetic_acid	Test	-1.24413	1	-1.0857	1.17874	17.6331	27.1071	9	10	23	14	9	0	10	1	3	0	0	0	0	0	0	0	2415.89	2474.62	3601.51	3231.46	2822.18	2494.2	1363.26	985.075	93.7581	5407.41	6724.79	9735.16	9850.6	8396.3	6085.95	3809.43	1909.88	555.889	186.128	192.975	299.588	379.76	369.215	317.847	233.852	147.932
[ID_226]_Equol	Training	-0.112265	0	-1.048	1.0983	19.0179	38.1411	12	12	32	18	14	0	15	0	3	0	0	0	0	0	0	0	2946.09	3254.42	4711.66	4842.27	3844.88	3130.97	2590.63	2090.01	1530.41	7437.1	9528.06	14107.6	15538.3	13321.8	10966.2	8802.66	6850.33	4820.5	247.221	265.138	438.908	597.867	618.515	539.476	411.931	322.565
[ID_229]_Fexofenadine	Training	-0.290039	1	-1.9916	3.96647	63.1579	86.6329	18	18	76	37	39	0	32	1	4	0	0	0	0	0	0	0	5876.15	6518.32	9630.88	11380.7	11030.5	10263.3	8806.19	7842.61	6713.73	15873.7	20526.6	31131.3	38322.8	39960.9	38813.7	34788.6	29810.4	25607.4	566.925	599.933	1058.78	1536.37	1872.12	1920.44	1779.26	1576.02
[ID_236]_N-(2-Morpholinoethyl)-4-(1H-pyrazol-1-yl)benzamide	Test	-0.313298	0	-0.6929	0.48011	43.1298	47.4999	11	12	42	22	20	0	16	4	2	0	0	0	0	0	0	0	3625.27	4093.92	5509.99	5154.83	4538.91	3832.38	3428.19	3529.56	3395.69	8803.98	11068.8	15709.9	16480.2	15269.7	13211.6	10976.4	10127.7	10007	322.528	344.469	606.171	751.861	736.652	719.685	567.923	479.878
[ID_239]_N-Acetyl-DL-tryptophan	Test	-1.63185	1	-1.3798	1.90385	31.5734	36.8211	9	10	32	18	14	0	13	2	3	0	0	0	0	0	0	0	3049.95	3158.16	4540.71	4393.21	4102.87	4154.08	3537.43	2773.85	1532.31	7076.69	8792.48	12570.1	13415.3	12860.8	11396	9764.56	7737.77	5176.4	252.544	259.994	427.993	556.811	573.779	551.464	508.331	387.495
[ID_240]_N-Acetyl-L-phenylalanine	Training	-1.40873	1	-0.9594	0.920448	28.2734	31.5343	6	6	28	15	13	0	11	1	3	0	0	0	0	0	0	0	2564.21	2519.03	3432.72	3261	3063.27	3388.11	2429.87	1489.96	531.152	5955.26	7216.46	9711.26	10327	9581.71	8917.61	7310.37	4915.5	2481.42	220.542	219.092	356.123	470.705	470.41	438.754	407.686	281.257
[ID_241]_N-Acetyl-L-tyrosine	Training	-1.31786	1	-1.4197	2.01555	30.838	32.3363	6	6	29	16	13	0	11	1	4	0	0	0	0	0	0	0	2820.18	2715.22	3804.94	3675.55	3299.79	3582.31	2652.26	1909.24	1233.24	6171.65	7486.47	10202	11034.3	10163.2	9282.51	7714.96	5473.82	3221.88	233.894	231.48	369.073	496.278	506.504	462.225	423.225	310.873
[ID_242]_N2-[2-(2-Pyridyl)ethyl]-4-hydroxyquinazoline-2-carboxamide	Test	-1.43158	0	-1.4111	1.9912	25.2068	42.8323	12	12	35	22	13	0	16	4	2	0	0	0	0	0	0	0	3618.15	3909.33	5486.44	5681.1	4821.86	4166.38	3506.35	3285.93	2857.55	8586.4	10566.6	14679.6	15318.3	13036.5	11037.7	9634.98	9134.4	8467.09	275.498	289.491	471.486	593.562	546.862	489.907	413.193	374.382
[ID_249]_Theophylline	Training	-1.98845	0	-1.9576	3.8322	22.0188	23.6583	5	5	21	13	8	0	7	4	2	0	0	0	0	0	0	0	2314.7	2454.11	3735.88	4093.45	3318.51	1278.03	189.71	3.04819	0	4619.33	5552.72	8249.45	9051.18	7822.05	4564.95	1689.42	93.2512	0	174.041	180.958	308.147	331.519	395.301	257.826	221.595	20.1554
[ID_255]_3-Indoxyl_sulphate	Test	-2.62291	1	-0.9295	0.86397	15.5696	25.9556	9	10	21	14	7	0	8	1	4	1	0	0	0	0	0	0	3409.14	3825.25	4432.18	3553.58	3610.8	3048.91	1757.98	731.817	62.5202	5311.38	6512.97	9090.01	8500.89	7458.92	5655.7	3606.38	1828.11	422.945	179.706	184.457	304.253	321.089	293.197	282.987	199.338	122.265
[ID_256]_3-Methylxanthine	Training	-3.50704	0	-1.7236	2.9708	16.6023	19.898	5	5	17	12	5	0	6	4	2	0	0	0	0	0	0	0	2167.39	2249.55	3401.94	3323.97	2686.3	802.1	86.7313	0	0	4102.56	4887.5	7048.27	7012.77	5556.82	2412.16	596.571	0	0	146.345	150.835	248.074	252.434	268.432	145.502	87.6666	0
[ID_258]_4'-Hydroxydiclofenac	Training	-0.290677	1	0.4029	0.162328	28.8643	39.8407	12	12	31	20	11	0	14	1	3	0	0	0	2	0	0	2	5508.38	3927.48	5952.12	6817.89	7723.59	5594.33	5681.32	4432.35	4168.57	8171.59	9572.32	13661.4	15051.9	14178.5	12950.1	12555.8	10275.5	6505.48	253.878	256.457	396.459	533.494	534.068	491.273	453.771	424.82
[ID_266]_Indole-3-lactic_acid	Training	-2.16863	1	-1.2152	1.47671	21.2721	30.2007	9	10	26	15	11	0	11	1	3	0	0	0	0	0	0	0	2562.18	2643.1	3810.33	3728.86	2859.47	2566.36	2280.15	1319.93	518.472	5893.09	7377.78	10699.6	10969.2	9474.16	7439.2	5763.28	3651.69	1629.89	207.106	214.751	345.07	454.208	442.408	374.069	312.044	226.786
[ID_275]_Uric_acid	Training	-2.80903	0	-2.5528	6.51679	32.8488	23.7936	0	0	21	14	7	0	7	4	3	0	0	0	0	0	0	0	2569.65	2634.16	4155.83	4470.68	3700.5	2101.06	644.824	51.4292	0	4804.63	5740.71	8534.44	9450.32	8240.8	5217.84	2010.8	339.292	0	180.675	183.875	314.931	341.265	396.933	296.954	193.986	48.5689
[truncated: 2,829 more columns]

## Sheet: Pe+Pg
Name	Status	BT.Eq2	LogBT.Eq2	nAcid	ALogP	ALogp2	AMR	apol	naAromAtom	nAromBond	nAtom	nHeavyAtom	nH	nB	nC	nN	nO	nS	nP	nF	nCl	nBr	nI	nX	ATS0m	ATS1m	ATS2m	ATS3m	ATS4m	ATS5m	ATS6m	ATS7m	ATS8m	ATS0v	ATS1v	ATS2v	ATS3v	ATS4v	ATS5v	ATS6v	ATS7v	ATS8v	ATS0e	ATS1e	ATS2e	ATS3e	ATS4e	ATS5e	ATS6e
[ID_126]_PEG_n5	Training	0.00969775	-2.01333	0	-1.421	2.01924	58.7276	37.0814	0	0	38	16	22	0	10	0	6	0	0	0	0	0	0	0	3000.8	2917.36	3097.75	2998.81	2554.37	2478.58	2337.31	1924.86	1828.92	6217.36	7603.64	9196.68	8921.63	8573.18	8064.54	6946.87	6501.97	5999.9	303.322	299.336	543.697	605.867	491.509	597.54	484.205
[ID_127]_PEG_n6	Training	0.00738291	-2.13177	0	-1.5519	2.40839	69.7711	44.0706	0	0	45	19	26	0	12	0	7	0	0	0	0	0	0	0	3549.36	3494.38	3741.31	3660.3	3183.88	3128.23	2998.81	2554.37	2478.58	7405.12	9091.56	11074.8	10896.4	10644.4	10129.2	8921.63	8573.18	8064.54	358.628	355.415	651.097	727.528	602.932	745.251	605.867
[ID_128]_PEG_n7	Training	0.0118956	-1.92461	0	-1.6828	2.83182	80.8146	51.0598	0	0	52	22	30	0	14	0	8	0	0	0	0	0	0	0	4097.92	4071.4	4384.87	4321.8	3813.4	3777.89	3660.3	3183.88	3128.23	8592.88	10579.5	12953	12871.2	12715.6	12193.8	10896.4	10644.4	10129.2	413.935	411.494	758.498	849.19	714.355	892.962	727.528
[ID_129]_PEG_n8	Training	0.0363291	-1.43975	0	-1.8137	3.28951	91.8581	58.049	0	0	59	25	34	0	16	0	9	0	0	0	0	0	0	0	4646.48	4648.42	5028.43	4983.3	4442.91	4427.55	4321.8	3813.4	3777.89	9780.63	12067.4	14831.1	14845.9	14786.8	14258.5	12871.2	12715.6	12193.8	469.241	467.573	865.898	970.852	825.779	1040.67	849.19
[ID_134]_PPG_n4	Training	0.367511	-0.434729	0	-1.3329	1.77662	66.0217	42.4666	0	0	43	17	26	0	12	0	5	0	0	0	0	0	0	0	3037.43	3014.25	3888.81	3888.75	3125.36	3489.06	3036.2	2145.98	2287.04	6972.33	8727.68	11521	12243	11796.3	11985.6	11232.9	9002.72	7956.82	331.925	330.361	607.869	771.004	744.528	726.851	766.22
[ID_135]_PPG_n5	Training	0.294882	-0.530351	0	-1.4745	2.17415	81.6496	52.5494	0	0	53	21	32	0	15	0	6	0	0	0	0	0	0	0	3732.28	3759.75	4891.03	4968.37	4132.17	4691.08	4191.51	3161.94	3489.06	8645.78	10868.6	14449.7	15598	15429.1	16014.4	15369.6	12915.3	11985.6	408.209	408.215	758.162	964.372	947.673	960.185	1022.45
[ID_136]_PPG_n6	Training	0.242322	-0.615607	0	-1.6161	2.61178	97.2775	62.6321	0	0	63	25	38	0	18	0	7	0	0	0	0	0	0	0	4427.14	4505.25	5893.24	6048	5138.97	5893.1	5346.83	4177.89	4691.08	10319.2	13009.5	17378.5	18953.1	19061.9	20043.2	19506.4	16827.9	16014.4	484.493	486.07	908.456	1157.74	1150.82	1193.52	1278.68
[ID_137]_PPG_n7	Training	0.24341	-0.613662	0	-1.7577	3.08951	112.905	72.7149	0	0	73	29	44	0	21	0	8	0	0	0	0	0	0	0	5122	5250.75	6895.46	7127.62	6145.78	7095.12	6502.14	5193.84	5893.1	11992.7	15150.4	20307.2	22308.2	22694.7	24072	23643.1	20740.4	20043.2	560.777	563.924	1058.75	1351.11	1353.96	1426.85	1534.91
[ID_138]_PPG_n8	Training	0.180583	-0.743322	0	-1.8993	3.60734	128.533	82.7977	0	0	83	33	50	0	24	0	9	0	0	0	0	0	0	0	5816.85	5996.24	7897.67	8207.24	7152.59	8297.14	7657.45	6209.79	7095.12	13666.1	17291.3	23236	25663.2	26327.6	28100.8	27779.8	24653	24072	637.061	641.779	1209.04	1544.47	1557.11	1660.19	1791.13
[ID_173]_PEG_n10	Training	0.0206205	-1.6857	0	-2.0755	4.3077	113.945	72.0273	0	0	73	31	42	0	20	0	11	0	0	0	0	0	0	0	5743.61	5802.46	6315.56	6306.29	5701.94	5726.86	5644.79	5072.42	5077.21	12156.2	15043.3	18587.4	18795.4	18929.2	18387.8	16820.7	16858	16323.1	579.855	579.73	1080.7	1214.18	1048.62	1336.1	1092.51
[ID_174]_PEG_n11	Training	0.0215331	-1.66689	0	-2.2064	4.8682	124.989	79.0165	0	0	80	34	46	0	22	0	12	0	0	0	0	0	0	0	6292.17	6379.48	6959.12	6967.79	6331.45	6376.52	6306.29	5701.94	5726.86	13343.9	16531.2	20465.5	20770.2	21000.4	20452.4	18795.4	18929.2	18387.8	635.161	635.809	1188.1	1335.84	1160.05	1483.81	1214.18
[ID_175]_PEG_n12	Training	0.0175551	-1.7556	0	-2.3373	5.46297	136.032	86.0057	0	0	87	37	50	0	24	0	13	0	0	0	0	0	0	0	6840.73	6956.5	7602.68	7629.28	6960.96	7026.18	6967.79	6331.45	6376.52	14531.7	18019.1	22343.7	22745	23071.6	22517.1	20770.2	21000.4	20452.4	690.468	691.888	1295.5	1457.5	1271.47	1631.52	1335.84
[ID_176]_PEG_n13	Training	0.0148917	-1.82705	0	-2.4682	6.09201	147.076	92.9948	0	0	94	40	54	0	26	0	14	0	0	0	0	0	0	0	7389.29	7533.52	8246.24	8290.78	7590.47	7675.83	7629.28	6960.96	7026.18	15719.4	19507	24221.8	24719.7	25142.8	24581.7	22745	23071.6	22517.1	745.774	747.967	1402.9	1579.16	1382.89	1779.23	1457.5
[ID_177]_PEG_n14	Training	0.0117817	-1.92879	0	-2.5991	6.75532	158.119	99.984	0	0	101	43	58	0	28	0	15	0	0	0	0	0	0	0	7937.85	8110.54	8889.8	8952.28	8219.99	8325.49	8290.78	7590.47	7675.83	16907.2	20994.9	26100	26694.5	27214	26646.4	24719.7	25142.8	24581.7	801.081	804.046	1510.3	1700.82	1494.32	1926.94	1579.16
[ID_178]_PEG_n15	Training	0.0117871	-1.92859	0	-2.73	7.4529	169.163	106.973	0	0	108	46	62	0	30	0	16	0	0	0	0	0	0	0	8486.41	8687.56	9533.36	9613.77	8849.5	8975.15	8952.28	8219.99	8325.49	18095	22482.9	27978.1	28669.2	29285.2	28711	26694.5	27214	26646.4	856.388	860.125	1617.7	1822.48	1605.74	2074.65	1700.82
[ID_179]_PPG_n10	Training	0.0679585	-1.16776	0	-2.1825	4.76331	159.789	102.963	0	0	103	41	62	0	30	0	11	0	0	0	0	0	0	0	7206.57	7487.24	9902.1	10366.5	9166.2	10701.2	9968.08	8241.7	9499.16	17013	21573.2	29093.5	32373.3	33593.2	36158.4	36053.3	32478.2	32129.6	789.629	797.488	1509.63	1931.21	1963.4	2126.85	2303.59
[truncated: 2,830 more columns]

## Sheet: Pe
Name	Status	LogBT.Eq2	nAcid	ALogP	ALogp2	AMR	apol	naAromAtom	nAromBond	nAtom	nHeavyAtom	nH	nB	nC	nN	nO	nS	nP	nF	nCl	nBr	nI	nX	ATS0m	ATS1m	ATS2m	ATS3m	ATS4m	ATS5m	ATS6m	ATS7m	ATS8m	ATS0v	ATS1v	ATS2v	ATS3v	ATS4v	ATS5v	ATS6v	ATS7v	ATS8v	ATS0e	ATS1e	ATS2e	ATS3e	ATS4e	ATS5e	ATS6e	ATS7e
[ID_126]_PEG_n5	Training	-2.01333	0	-1.421	2.01924	58.7276	37.0814	0	0	38	16	22	0	10	0	6	0	0	0	0	0	0	0	3000.8	2917.36	3097.75	2998.81	2554.37	2478.58	2337.31	1924.86	1828.92	6217.36	7603.64	9196.68	8921.63	8573.18	8064.54	6946.87	6501.97	5999.9	303.322	299.336	543.697	605.867	491.509	597.54	484.205	380.086
[ID_127]_PEG_n6	Training	-2.13177	0	-1.5519	2.40839	69.7711	44.0706	0	0	45	19	26	0	12	0	7	0	0	0	0	0	0	0	3549.36	3494.38	3741.31	3660.3	3183.88	3128.23	2998.81	2554.37	2478.58	7405.12	9091.56	11074.8	10896.4	10644.4	10129.2	8921.63	8573.18	8064.54	358.628	355.415	651.097	727.528	602.932	745.251	605.867	491.509
[ID_128]_PEG_n7	Training	-1.92461	0	-1.6828	2.83182	80.8146	51.0598	0	0	52	22	30	0	14	0	8	0	0	0	0	0	0	0	4097.92	4071.4	4384.87	4321.8	3813.4	3777.89	3660.3	3183.88	3128.23	8592.88	10579.5	12953	12871.2	12715.6	12193.8	10896.4	10644.4	10129.2	413.935	411.494	758.498	849.19	714.355	892.962	727.528	602.932
[ID_129]_PEG_n8	Training	-1.43975	0	-1.8137	3.28951	91.8581	58.049	0	0	59	25	34	0	16	0	9	0	0	0	0	0	0	0	4646.48	4648.42	5028.43	4983.3	4442.91	4427.55	4321.8	3813.4	3777.89	9780.63	12067.4	14831.1	14845.9	14786.8	14258.5	12871.2	12715.6	12193.8	469.241	467.573	865.898	970.852	825.779	1040.67	849.19	714.355
[ID_173]_PEG_n10	Training	-1.6857	0	-2.0755	4.3077	113.945	72.0273	0	0	73	31	42	0	20	0	11	0	0	0	0	0	0	0	5743.61	5802.46	6315.56	6306.29	5701.94	5726.86	5644.79	5072.42	5077.21	12156.2	15043.3	18587.4	18795.4	18929.2	18387.8	16820.7	16858	16323.1	579.855	579.73	1080.7	1214.18	1048.62	1336.1	1092.51	937.202
[ID_174]_PEG_n11	Training	-1.66689	0	-2.2064	4.8682	124.989	79.0165	0	0	80	34	46	0	22	0	12	0	0	0	0	0	0	0	6292.17	6379.48	6959.12	6967.79	6331.45	6376.52	6306.29	5701.94	5726.86	13343.9	16531.2	20465.5	20770.2	21000.4	20452.4	18795.4	18929.2	18387.8	635.161	635.809	1188.1	1335.84	1160.05	1483.81	1214.18	1048.62
[ID_175]_PEG_n12	Training	-1.7556	0	-2.3373	5.46297	136.032	86.0057	0	0	87	37	50	0	24	0	13	0	0	0	0	0	0	0	6840.73	6956.5	7602.68	7629.28	6960.96	7026.18	6967.79	6331.45	6376.52	14531.7	18019.1	22343.7	22745	23071.6	22517.1	20770.2	21000.4	20452.4	690.468	691.888	1295.5	1457.5	1271.47	1631.52	1335.84	1160.05
[ID_176]_PEG_n13	Training	-1.82705	0	-2.4682	6.09201	147.076	92.9948	0	0	94	40	54	0	26	0	14	0	0	0	0	0	0	0	7389.29	7533.52	8246.24	8290.78	7590.47	7675.83	7629.28	6960.96	7026.18	15719.4	19507	24221.8	24719.7	25142.8	24581.7	22745	23071.6	22517.1	745.774	747.967	1402.9	1579.16	1382.89	1779.23	1457.5	1271.47
[ID_177]_PEG_n14	Training	-1.92879	0	-2.5991	6.75532	158.119	99.984	0	0	101	43	58	0	28	0	15	0	0	0	0	0	0	0	7937.85	8110.54	8889.8	8952.28	8219.99	8325.49	8290.78	7590.47	7675.83	16907.2	20994.9	26100	26694.5	27214	26646.4	24719.7	25142.8	24581.7	801.081	804.046	1510.3	1700.82	1494.32	1926.94	1579.16	1382.89
[ID_178]_PEG_n15	Training	-1.92859	0	-2.73	7.4529	169.163	106.973	0	0	108	46	62	0	30	0	16	0	0	0	0	0	0	0	8486.41	8687.56	9533.36	9613.77	8849.5	8975.15	8952.28	8219.99	8325.49	18095	22482.9	27978.1	28669.2	29285.2	28711	26694.5	27214	26646.4	856.388	860.125	1617.7	1822.48	1605.74	2074.65	1700.82	1494.32
[truncated: 2,829 more columns]

## Sheet: Pg
Name	Status	LogBT.Eq2	nAcid	ALogP	ALogp2	AMR	apol	naAromAtom	nAromBond	nAtom	nHeavyAtom	nH	nB	nC	nN	nO	nS	nP	nF	nCl	nBr	nI	nX	ATS0m	ATS1m	ATS2m	ATS3m	ATS4m	ATS5m	ATS6m	ATS7m	ATS8m	ATS0v	ATS1v	ATS2v	ATS3v	ATS4v	ATS5v	ATS6v	ATS7v	ATS8v	ATS0e	ATS1e	ATS2e	ATS3e	ATS4e	ATS5e	ATS6e	ATS7e
[ID_134]_PPG_n4	Training	-0.434729	0	-1.3329	1.77662	66.0217	42.4666	0	0	43	17	26	0	12	0	5	0	0	0	0	0	0	0	3037.43	3014.25	3888.81	3888.75	3125.36	3489.06	3036.2	2145.98	2287.04	6972.33	8727.68	11521	12243	11796.3	11985.6	11232.9	9002.72	7956.82	331.925	330.361	607.869	771.004	744.528	726.851	766.22	722.783
[ID_135]_PPG_n5	Training	-0.530351	0	-1.4745	2.17415	81.6496	52.5494	0	0	53	21	32	0	15	0	6	0	0	0	0	0	0	0	3732.28	3759.75	4891.03	4968.37	4132.17	4691.08	4191.51	3161.94	3489.06	8645.78	10868.6	14449.7	15598	15429.1	16014.4	15369.6	12915.3	11985.6	408.209	408.215	758.162	964.372	947.673	960.185	1022.45	986.393
[ID_136]_PPG_n6	Training	-0.615607	0	-1.6161	2.61178	97.2775	62.6321	0	0	63	25	38	0	18	0	7	0	0	0	0	0	0	0	4427.14	4505.25	5893.24	6048	5138.97	5893.1	5346.83	4177.89	4691.08	10319.2	13009.5	17378.5	18953.1	19061.9	20043.2	19506.4	16827.9	16014.4	484.493	486.07	908.456	1157.74	1150.82	1193.52	1278.68	1250
[ID_137]_PPG_n7	Training	-0.613662	0	-1.7577	3.08951	112.905	72.7149	0	0	73	29	44	0	21	0	8	0	0	0	0	0	0	0	5122	5250.75	6895.46	7127.62	6145.78	7095.12	6502.14	5193.84	5893.1	11992.7	15150.4	20307.2	22308.2	22694.7	24072	23643.1	20740.4	20043.2	560.777	563.924	1058.75	1351.11	1353.96	1426.85	1534.91	1513.61
[ID_138]_PPG_n8	Training	-0.743322	0	-1.8993	3.60734	128.533	82.7977	0	0	83	33	50	0	24	0	9	0	0	0	0	0	0	0	5816.85	5996.24	7897.67	8207.24	7152.59	8297.14	7657.45	6209.79	7095.12	13666.1	17291.3	23236	25663.2	26327.6	28100.8	27779.8	24653	24072	637.061	641.779	1209.04	1544.47	1557.11	1660.19	1791.13	1777.23
[ID_179]_PPG_n10	Training	-1.16776	0	-2.1825	4.76331	159.789	102.963	0	0	103	41	62	0	30	0	11	0	0	0	0	0	0	0	7206.57	7487.24	9902.1	10366.5	9166.2	10701.2	9968.08	8241.7	9499.16	17013	21573.2	29093.5	32373.3	33593.2	36158.4	36053.3	32478.2	32129.6	789.629	797.488	1509.63	1931.21	1963.4	2126.85	2303.59	2304.45
[truncated: 2,829 more columns]
