# Supplementary material for: EDIACARAN FOSSILS FROM THE SOUTHWESTERN GREAT BASIN
Source: Royal Society of Chemistry journal article supplement (doi:10.1039/d3em00267e), 2000-01-01
Supplement: d3em00267e2.pdf [file d3em00267e2.pdf]

## Supporting Information

### ***In silico* approaches for the prediction of the breakthrough of organic contaminants in wastewater treatment plants**

*Nicola Chirico<sup>a,\*</sup>, Michael S. McLachlan<sup>b</sup>, Zhe Li<sup>b</sup> and Ester Papa<sup>a</sup>*

<sup>a</sup> QSAR Research Unit in Environmental Chemistry and Ecotoxicology, Department of Theoretical and Applied Sciences, University of Insubria, via J. H. Dunant 3, 21100, Varese, Italy.

<sup>b</sup> Department of Environmental Science (ACES), Stockholm University, 106 91 Stockholm, Sweden.

\*Corresponding author: [nicola.chirico@uninsubria.it](mailto:nicola.chirico@uninsubria.it)

# Table of contents

|                                                                                                                                                                                               |    |
|-----------------------------------------------------------------------------------------------------------------------------------------------------------------------------------------------|----|
| <b>Figures</b> .....                                                                                                                                                                          | 4  |
| <b>Figure S1.</b> Performances of the target chemicals QSPR (Ta dataset).....                                                                                                                 | 4  |
| <b>Figure S1.</b> QQ chart of the target chemicals QSPR (Ta dataset).....                                                                                                                     | 5  |
| <b>Figure S1.</b> Probability of coincidental relationships of the target chemicals QSPR (Ta dataset). ..                                                                                     | 6  |
| <b>Figure S2.</b> Performances of the target chemicals QSPR (Ta* dataset).....                                                                                                                | 7  |
| <b>Figure S2.</b> QQ chart of the target chemicals QSPR (Ta* dataset).....                                                                                                                    | 8  |
| <b>Figure S2.</b> Probability of coincidental relationships of the target chemicals, by removing endpoint outliers (Ta* dataset).....                                                         | 9  |
| <b>Figure S3.</b> Performances of the target and non-target chemicals QSPR (Ta+Nt dataset).....                                                                                               | 10 |
| <b>Figure S3.</b> QQ chart of the target and non-target chemicals QSPR (Ta+Nt dataset).....                                                                                                   | 11 |
| <b>Figure S3.</b> Probability of coincidental relationships of the target and non-target chemicals QSPR (Ta+Nt dataset). ..                                                                   | 12 |
| <b>Figure S4.</b> Performances of the target chemicals, by removing endpoint outliers, and non-target chemicals QSPR (Ta*+Nt dataset). ..                                                     | 13 |
| <b>Figure S4.</b> QQ chart and PCA for structural AD of training and test chemical of the target chemicals, by removing endpoint outliers, and non-target chemicals QSPR (Ta*+Nt dataset).... | 14 |
| <b>Figure S4.</b> Probability of coincidental relationships of the target chemicals, by removing endpoint outliers, and non-target chemicals QSPR (Ta*+Nt dataset). ..                        | 15 |
| <b>Figure S5.</b> Performances of the PEGs and PPGs QSPR (Pe+Pg dataset). ..                                                                                                                  | 16 |
| <b>Figure S5.</b> QQ chart of the PEGs and PPGs QSPR and Log BT distribution (Pe + Pg dataset). ..                                                                                            | 17 |
| <b>Figure S5.</b> Probability of coincidental relationships of the PEGs and PPGs QSPR (Pe+Pg dataset). ..                                                                                     | 18 |
| <b>Figure S6.</b> Performances of the PEGs QSPRs (Pe dataset). ..                                                                                                                             | 19 |
| <b>Figure S6.</b> Probability of coincidental relationships of the PEGs selected QSPR (Pe dataset). ..                                                                                        | 20 |
| <b>Figure S7.</b> Performances and probability of coincidental relationships of the PPGs QSPR (Pg dataset). ..                                                                                | 21 |
| <b>Figure S7.</b> QQ chart of the PPGs QSPR (Pg dataset).....                                                                                                                                 | 22 |
| <b>Figure S7.</b> Performances and probability of coincidental relationships of the PPGs QSPR (Pg dataset). ..                                                                                | 23 |
| <b>Statistics</b> .....                                                                                                                                                                       | 24 |
| <b>Statistics S1.</b> Performances the target chemicals QSPR (Ta dataset). ..                                                                                                                 | 24 |
| <b>Statistics S2.</b> Performances of the target chemicals, by removing endpoint outliers, QSPR (Ta* dataset). ..                                                                             | 25 |
| <b>Statistics S3.</b> Performances of the target and non-target chemicals QSPR (Ta+Nt dataset). ..                                                                                            | 26 |
| <b>Statistics S4.</b> Performances of the target chemicals, by removing endpoint outliers, and non-target chemicals QSPR (Ta*+Nt dataset). ..                                                 | 27 |

|                                                                                                                                                                           |    |
|---------------------------------------------------------------------------------------------------------------------------------------------------------------------------|----|
| <b>Statistics S5.</b> Performances of the PEGs and PPGs QSPR (Pe+Pg dataset).....                                                                                         | 28 |
| <b>Statistics S6.</b> Performances of the PEGs QSPR (Pe dataset). ....                                                                                                    | 29 |
| <b>Statistics S7.</b> Performances of the PPGs QSPR (Pg dataset). ....                                                                                                    | 30 |
| <b>Bootstrap analysis</b> .....                                                                                                                                           | 31 |
| <b>Bootstrap analysis S1.</b> Selection of the best candidate of target chemicals QSPR (Ta dataset)..                                                                     | 31 |
| <b>Bootstrap analysis S2.</b> Selection of the best candidate of target chemicals, by removing<br>endpoint outliers, QSPR (Ta* dataset). ....                             | 32 |
| <b>Bootstrap analysis S3.</b> Selection of the best candidate of target and non-target chemicals QSPR<br>(Ta+Nt dataset). ....                                            | 33 |
| <b>Bootstrap analysis S4.</b> Selection of the best candidate of target chemicals, by removing<br>endpoint outliers, and non-target chemicals QSPR (Ta*+Nt dataset). .... | 34 |
| <b>Bootstrap analysis S5.</b> Selection of the best candidate of PEGs and PPGs QSPR (Pe+Pg dataset).<br>.....                                                             | 35 |
| <b>Methods</b> .....                                                                                                                                                      | 36 |
| <b>Method S1.</b> Leave-one-out bootstrap. ....                                                                                                                           | 36 |
| <b>Method S2.</b> Selection of the best QSPRs from the step-up population.....                                                                                            | 36 |
| <b>Method S3.</b> Estimation of the probability of coincidental relationship among the descriptors and<br>the endpoint.....                                               | 38 |
| <b>Appendix</b> .....                                                                                                                                                     | 39 |
| <b>A1.</b> Descriptors filtering .....                                                                                                                                    | 39 |
| <b>A2.</b> Descriptors selection .....                                                                                                                                    | 39 |
| <b>A3.</b> Randomization .....                                                                                                                                            | 40 |
| <b>A4.</b> Leave-one-out bootstrap .....                                                                                                                                  | 41 |
| <b>Tables</b> .....                                                                                                                                                       | 43 |
| <b>Table S1.</b> Canonical SMILES.....                                                                                                                                    | 43 |
| <b>Table S2.</b> Descriptor classes calculated using the PaDEL-Descriptor software. ....                                                                                  | 52 |
| <b>Table S3.</b> Experimental and predicted Log BT values. ....                                                                                                           | 54 |
| <b>Table S4.</b> Descriptors of the QSPRs.....                                                                                                                            | 64 |
| <b>Chemical structures</b> .....                                                                                                                                          | 65 |
| <b>Chemical structures S1.</b> Target chemicals. ....                                                                                                                     | 65 |
| <b>Chemical structures S2.</b> Non-target chemicals.....                                                                                                                  | 69 |

## Figures

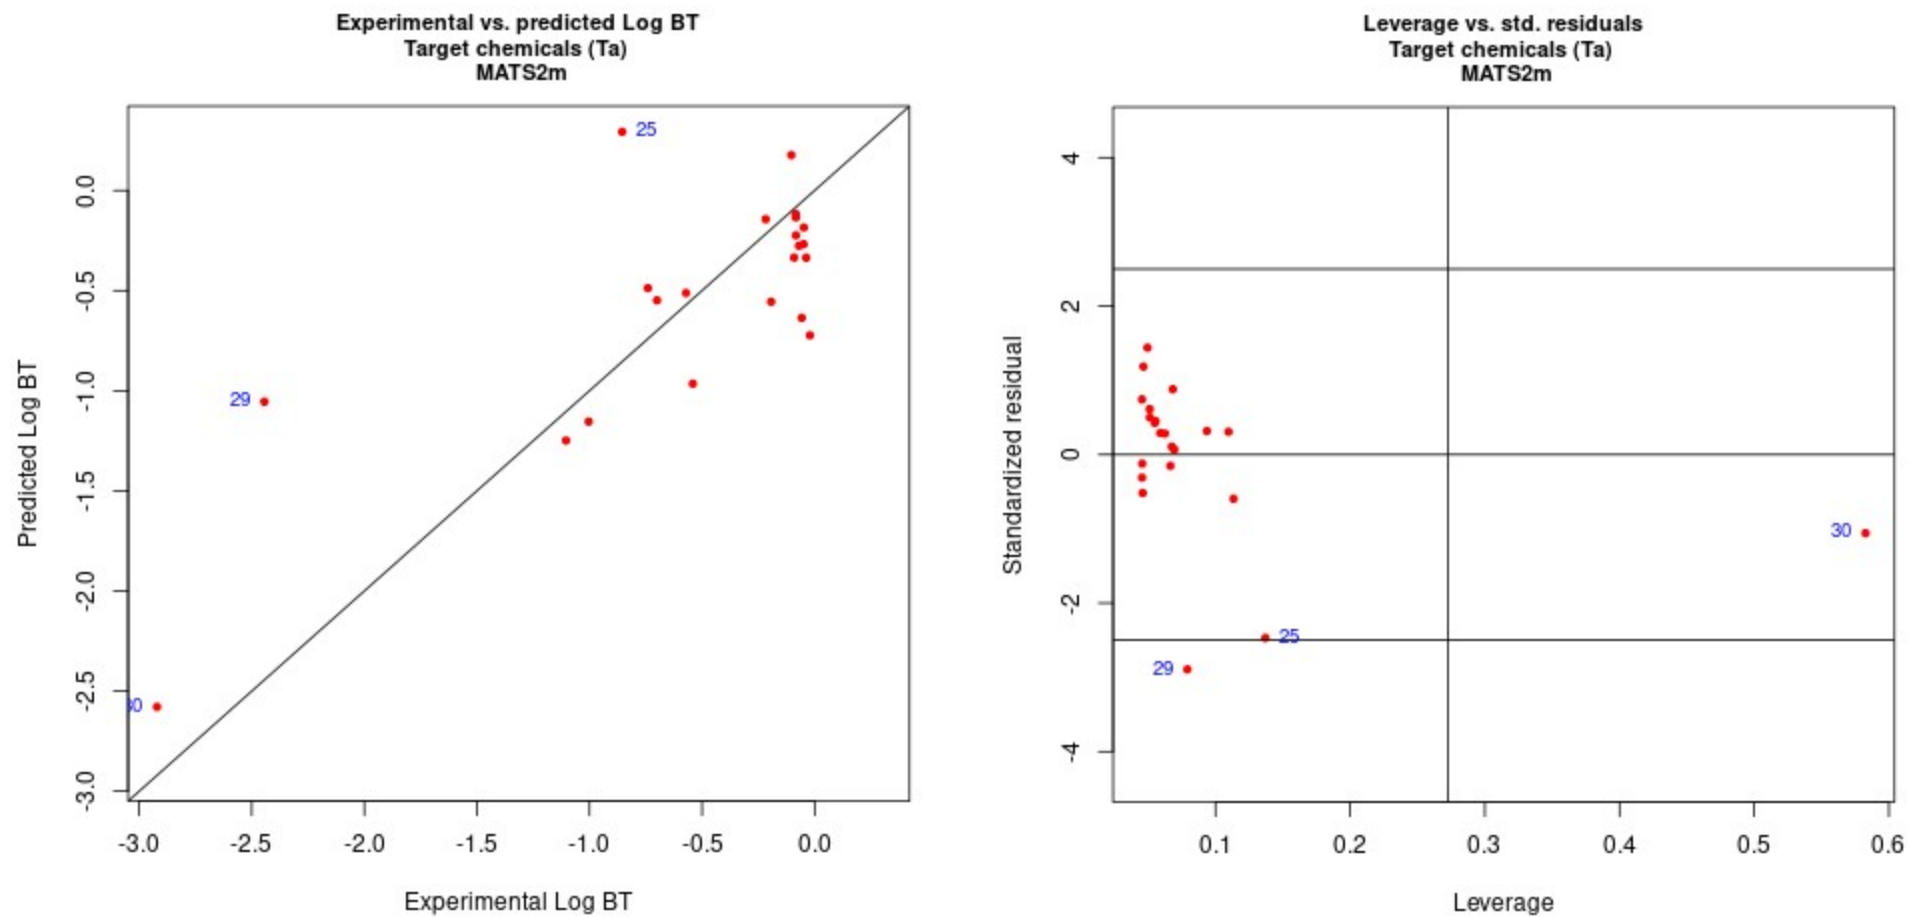

Figure S1. Performances of the target chemicals QSPR (Ta dataset).

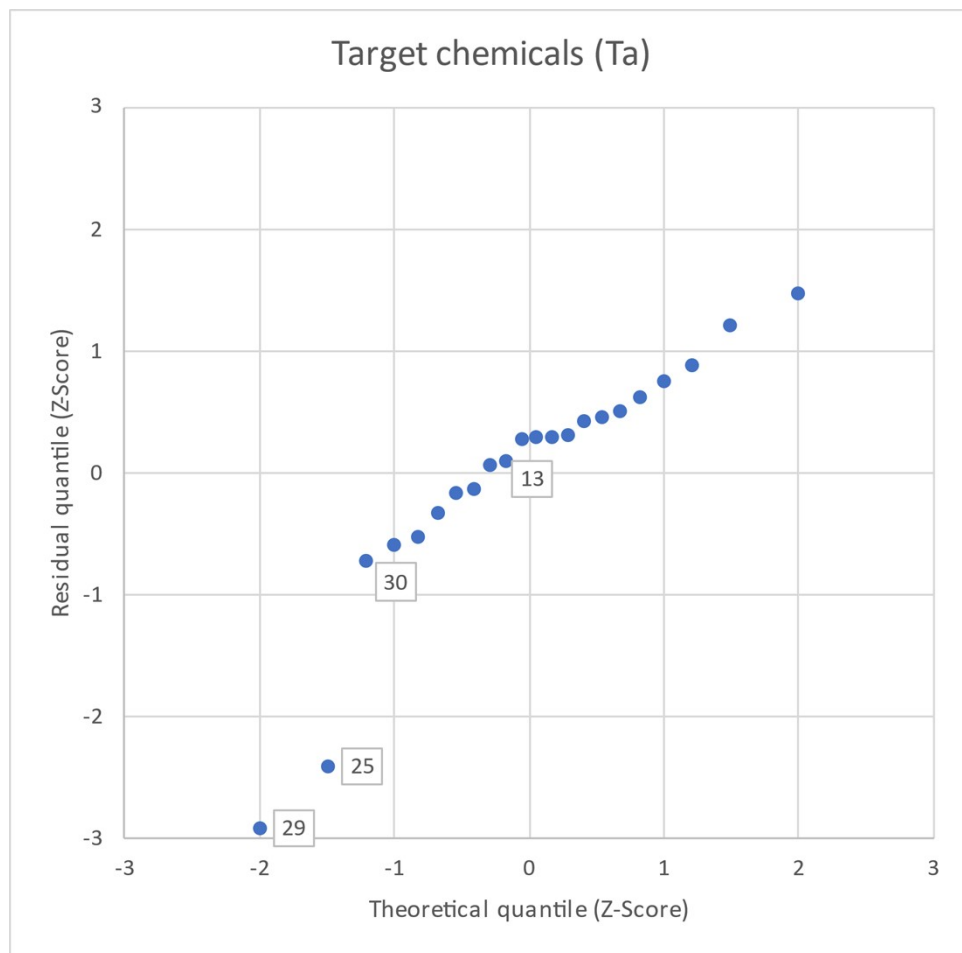

Figure S1. QQ chart of the target chemicals QSPR (Ta dataset).

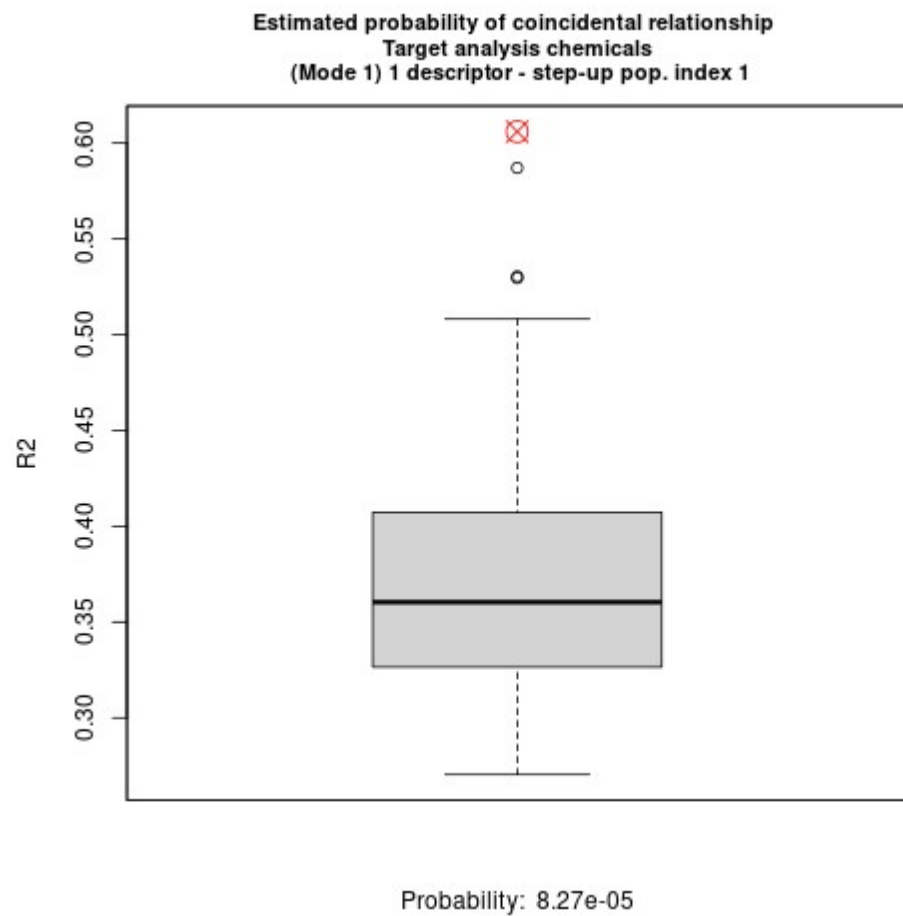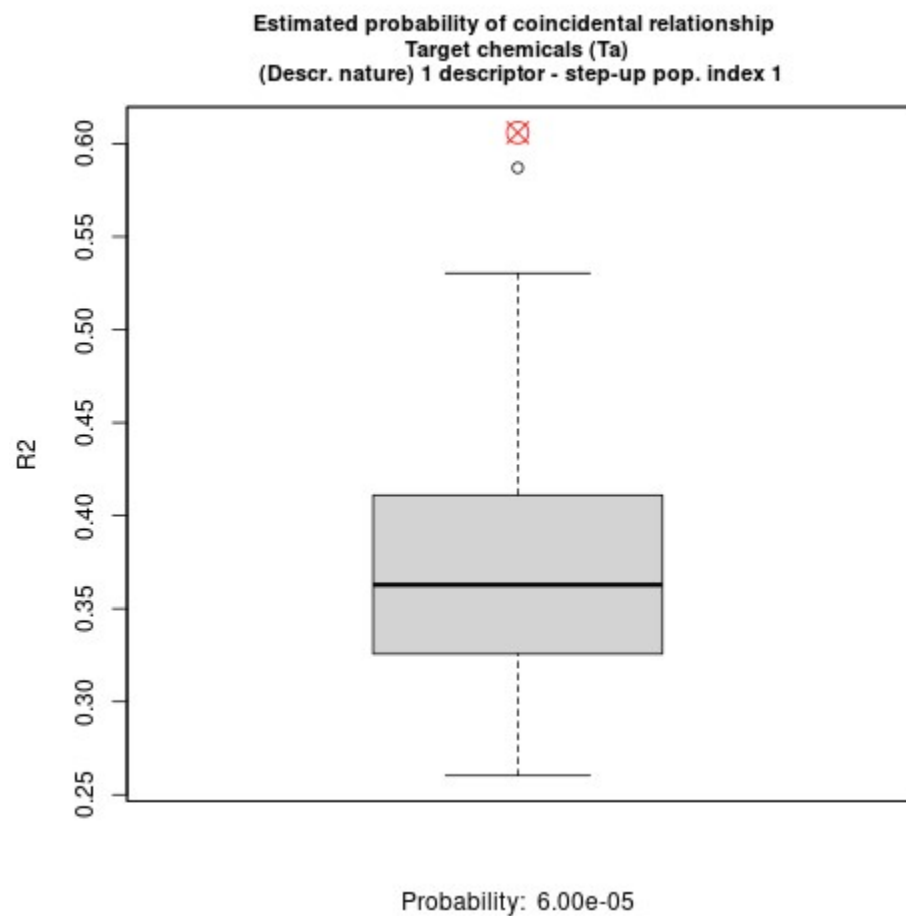

Figure S1. Probability of coincidental relationships of the target chemicals QSPR (Ta dataset).

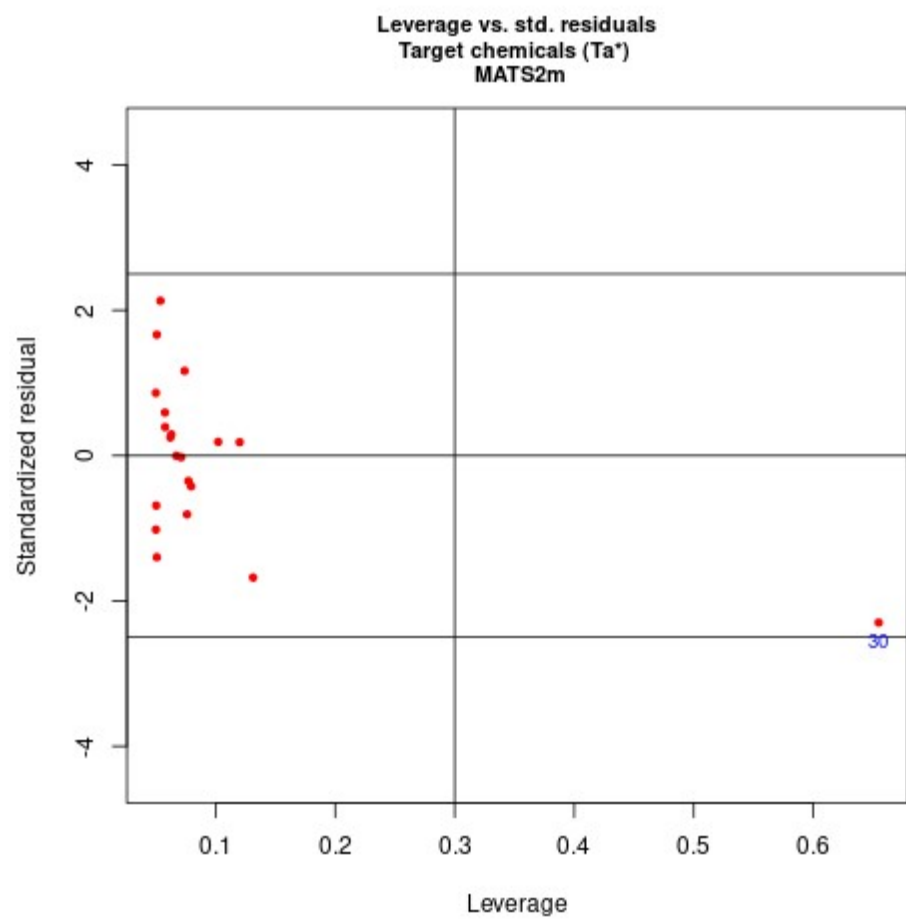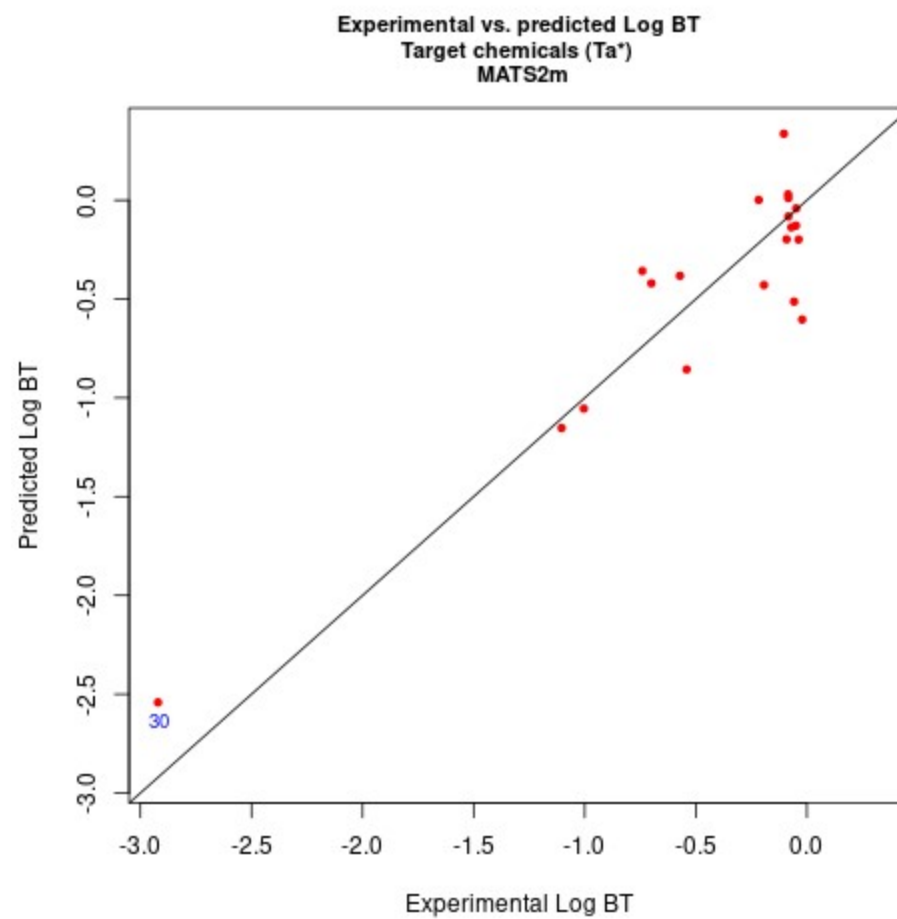

Figure S2. Performances of the target chemicals QSPR (Ta\* dataset).

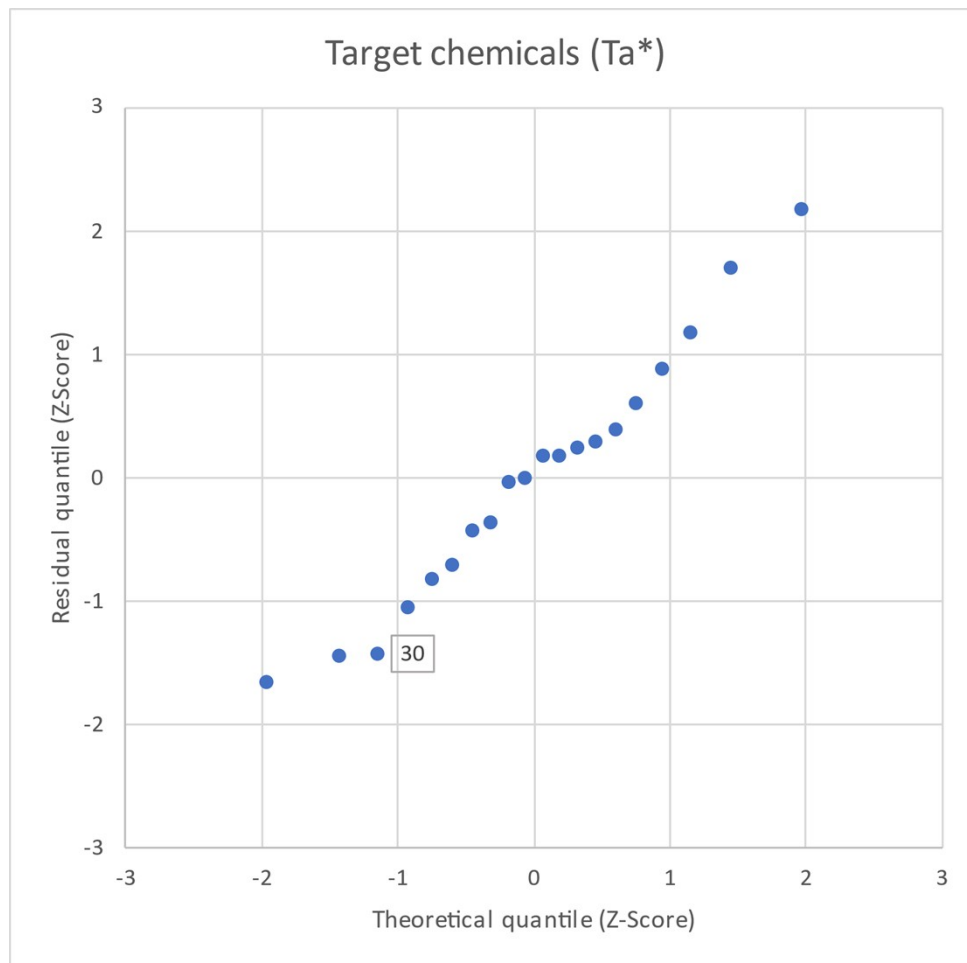

Figure S2. QQ chart of the target chemicals QSPR (Ta\* dataset).



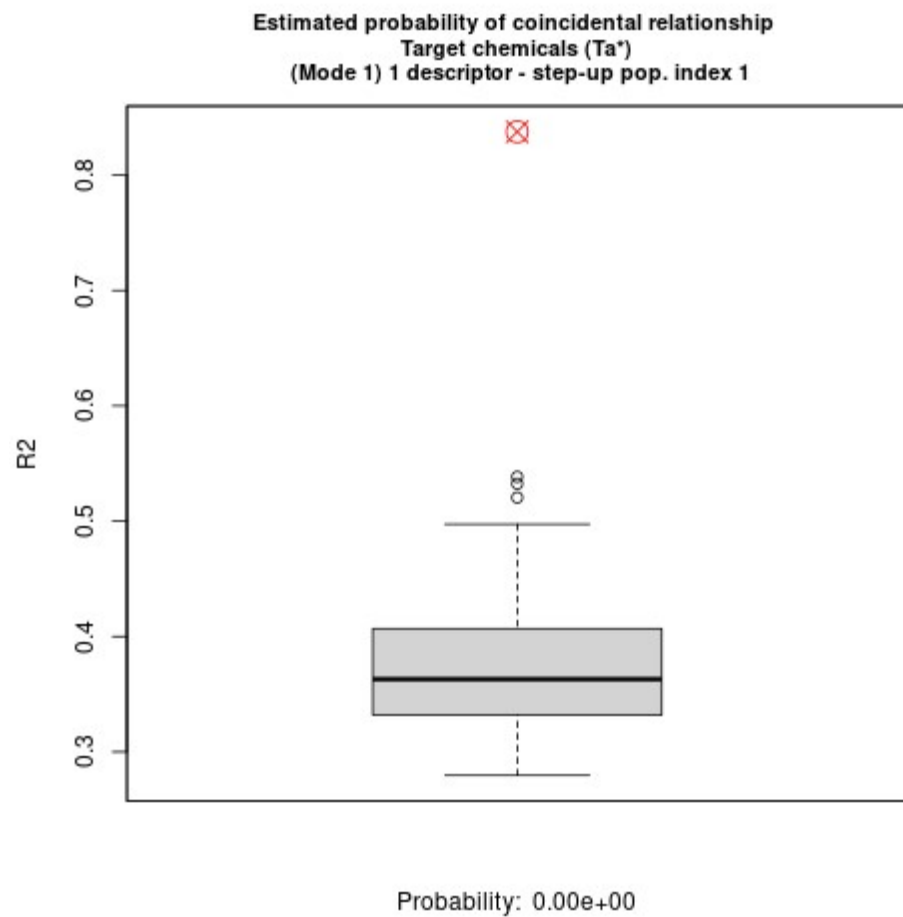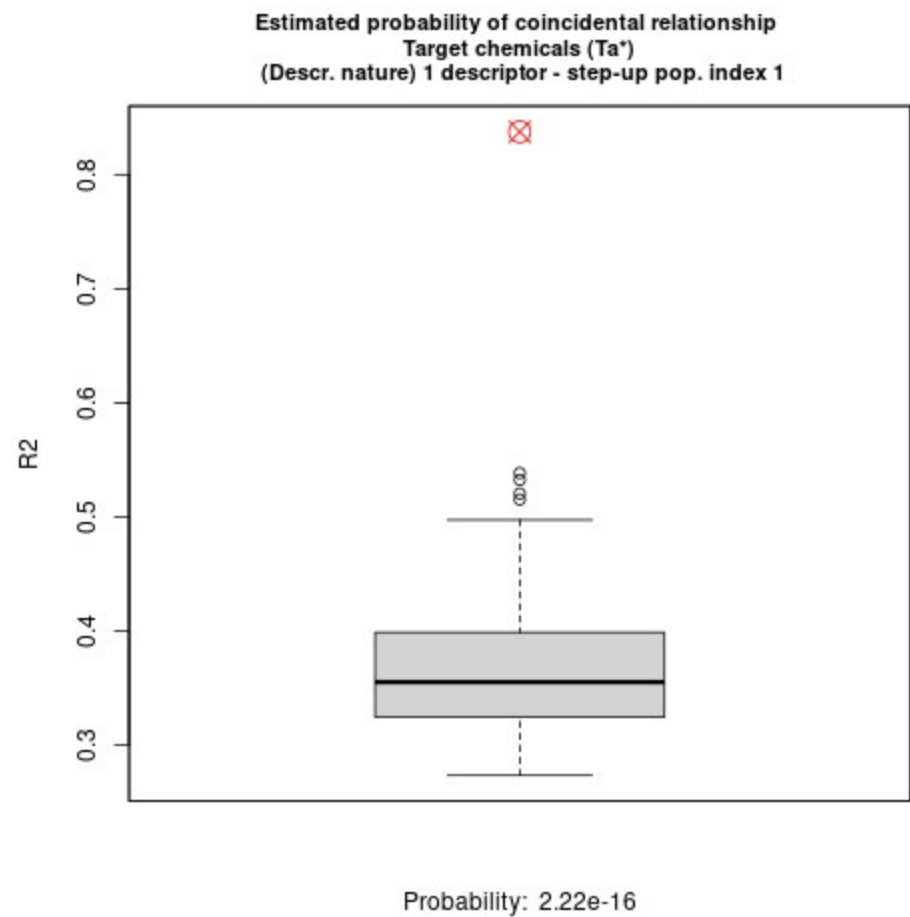

Figure S2. Probability of coincidental relationships of the target chemicals, by removing endpoint outliers (Ta\* dataset).

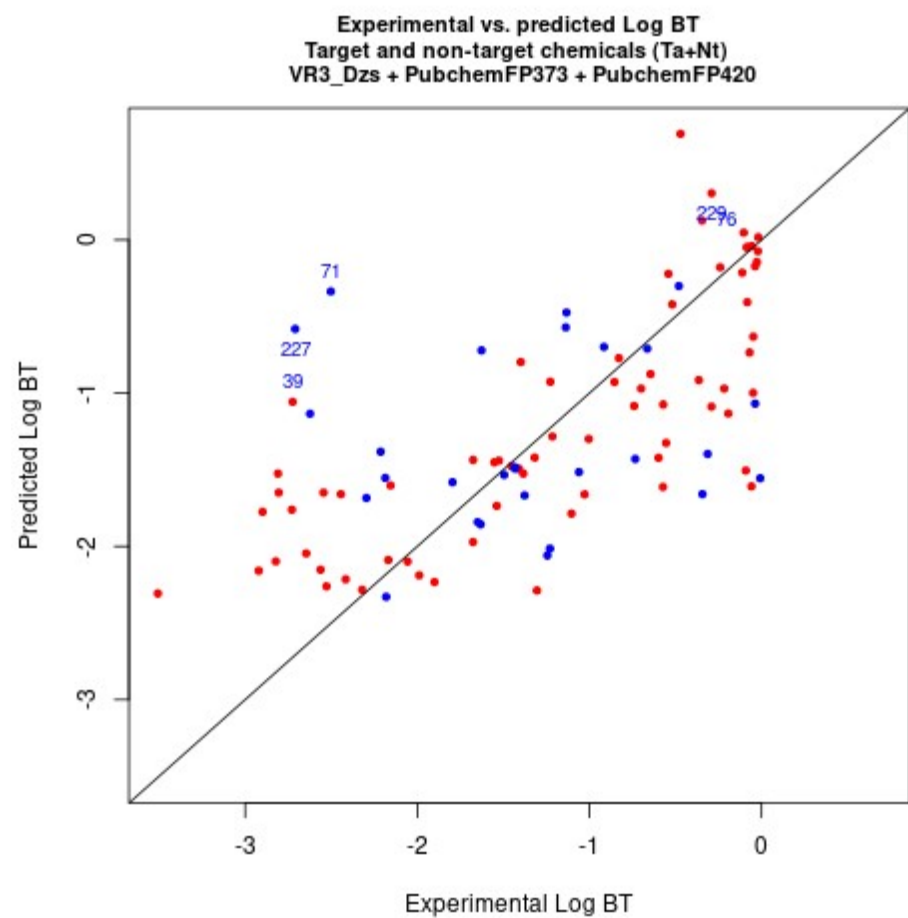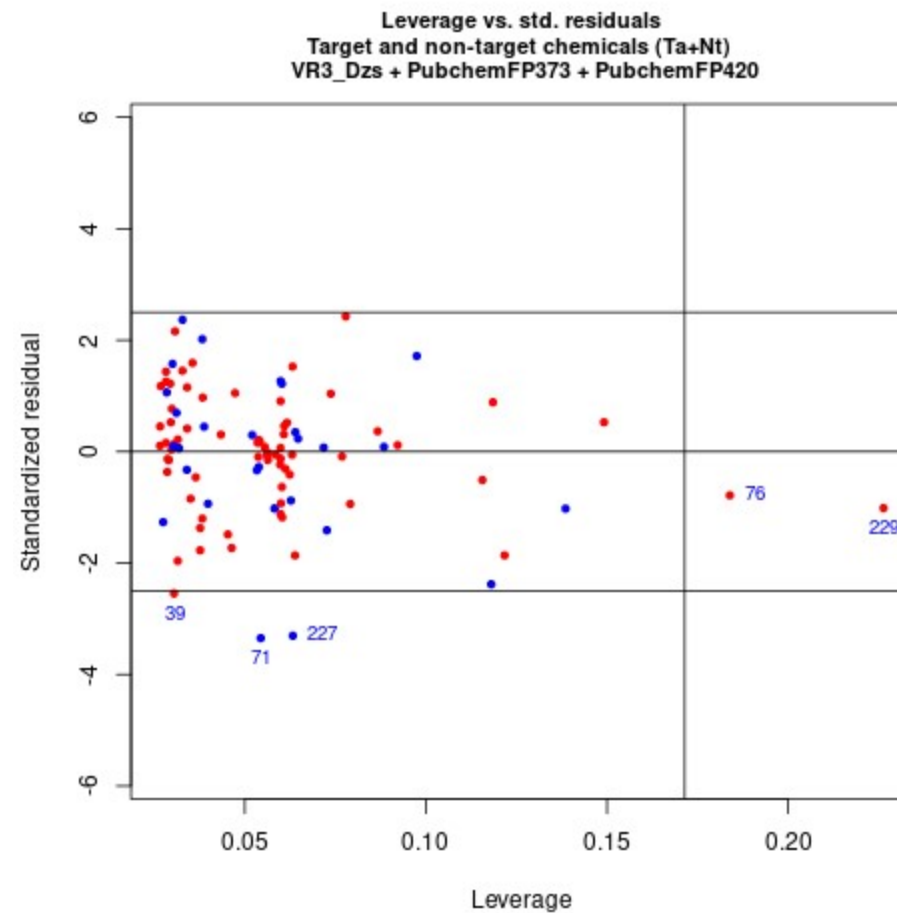

Figure S3. Performances of the target and non-target chemicals QSPR (Ta+Nt dataset).

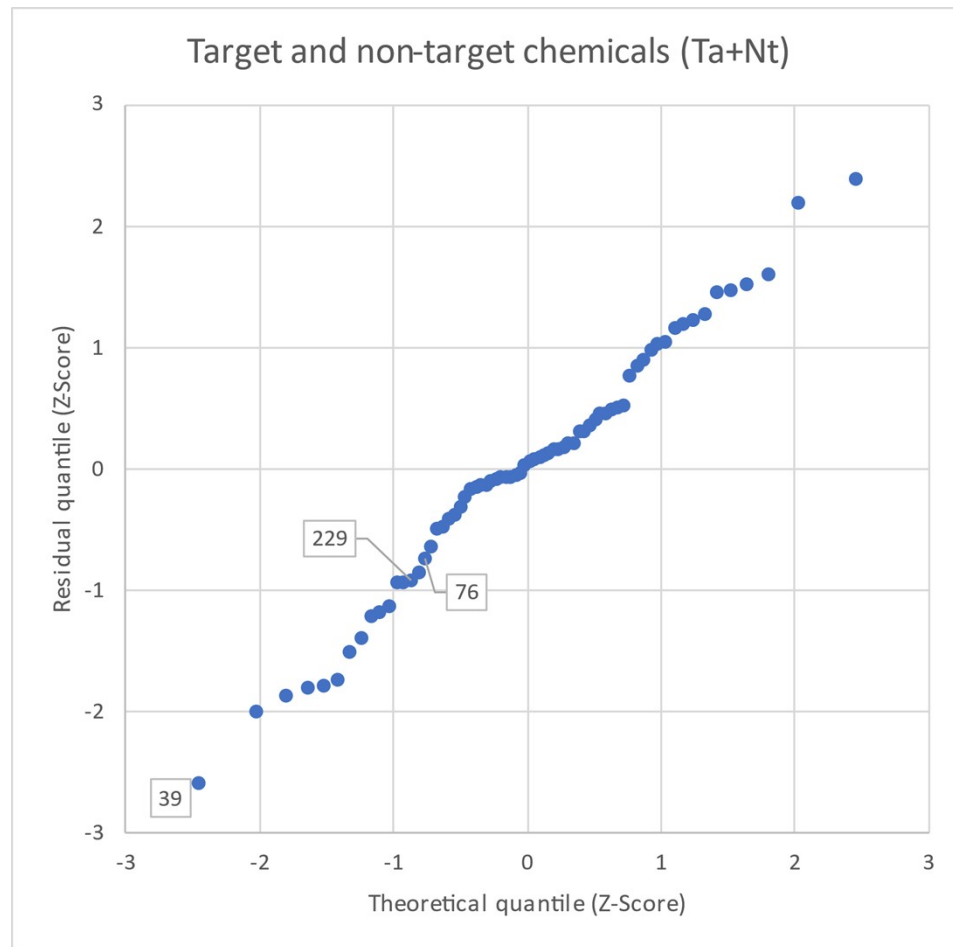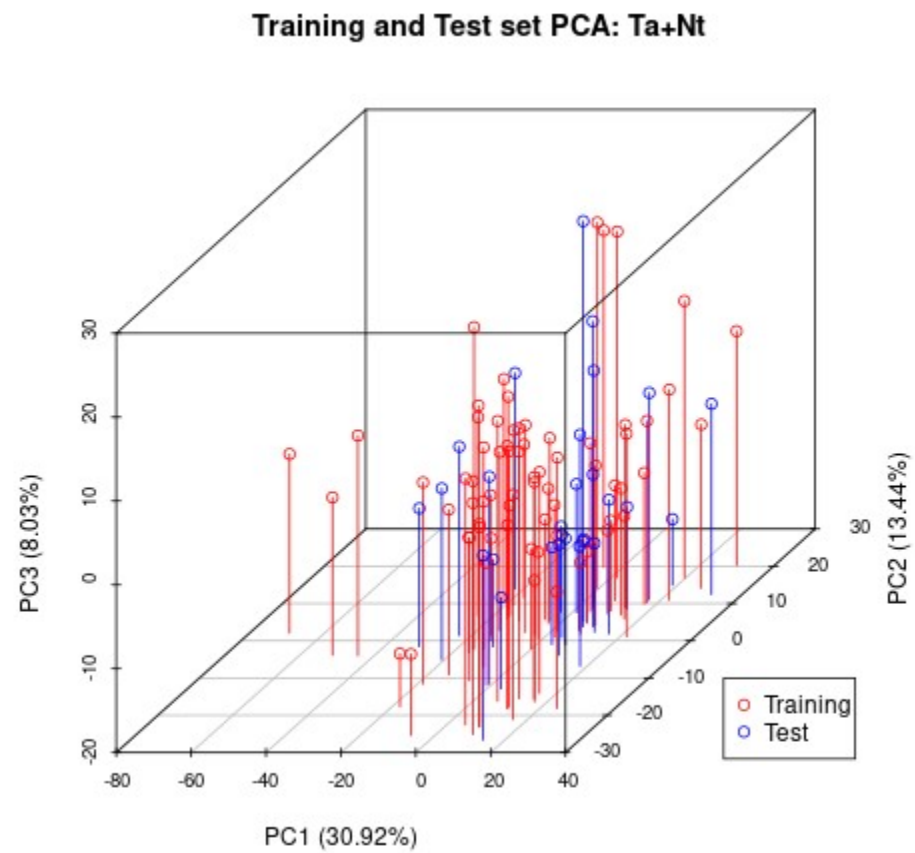

Figure S3. QQ chart of the target and non-target chemicals QSPR (Ta+Nt dataset).

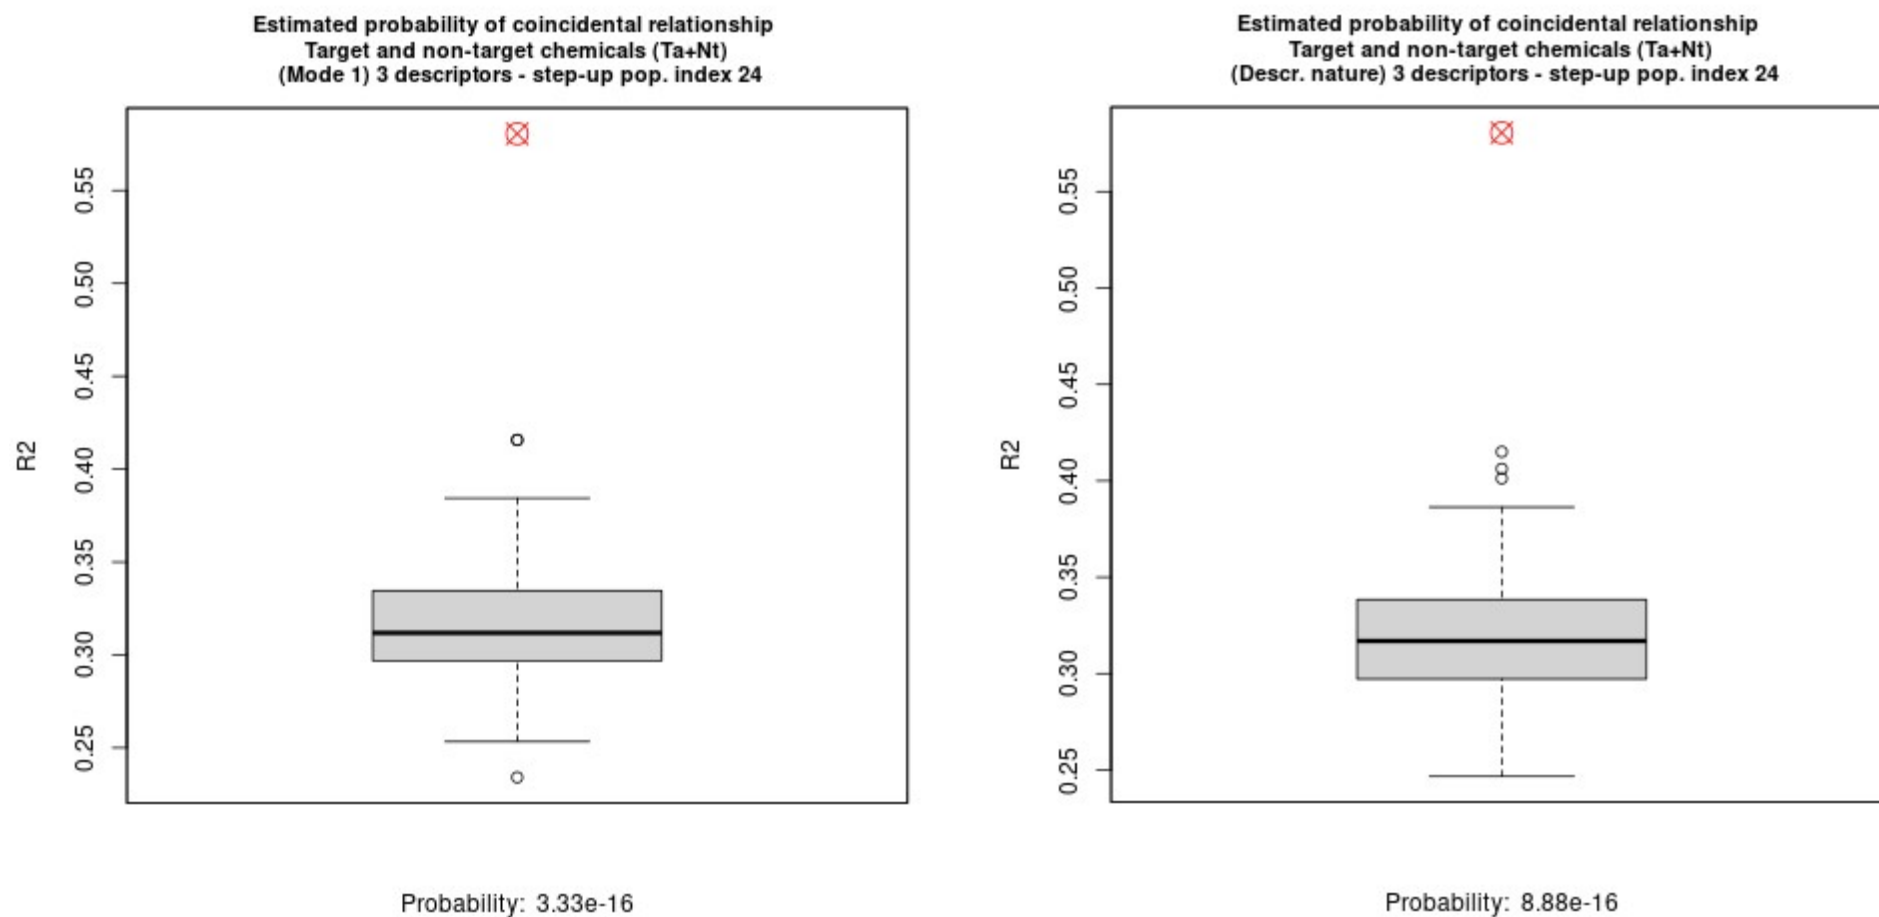

Figure S3. Probability of coincidental relationships of the target and non-target chemicals QSPR (Ta+Nt dataset).

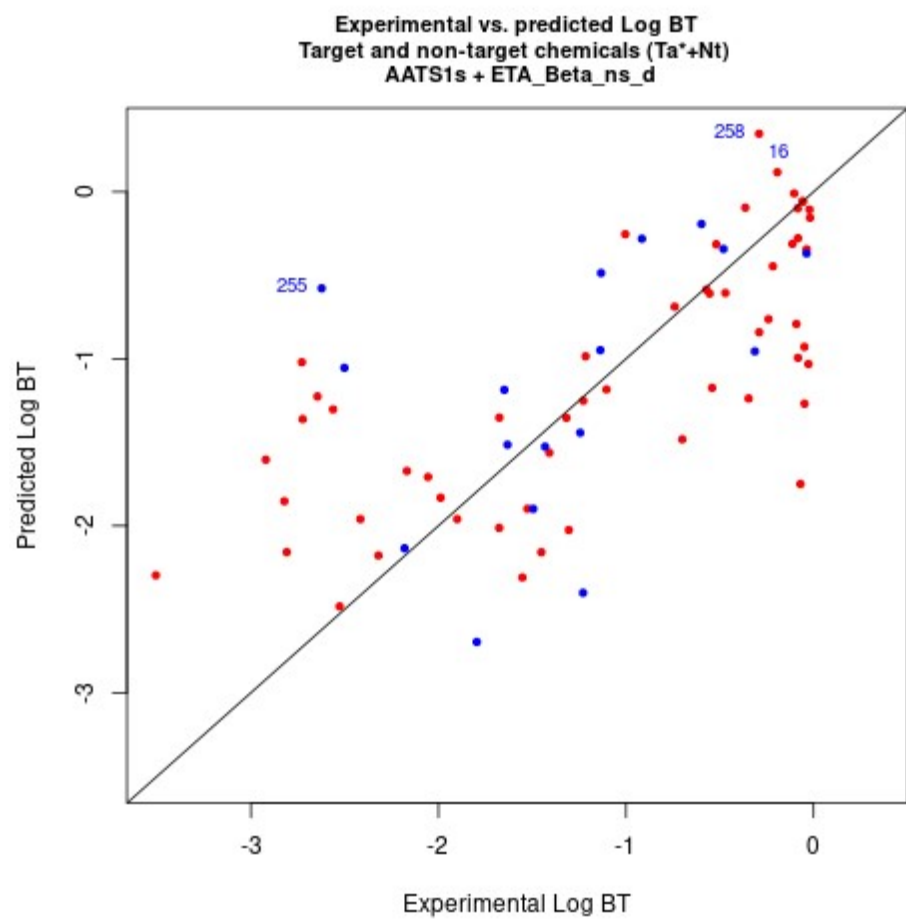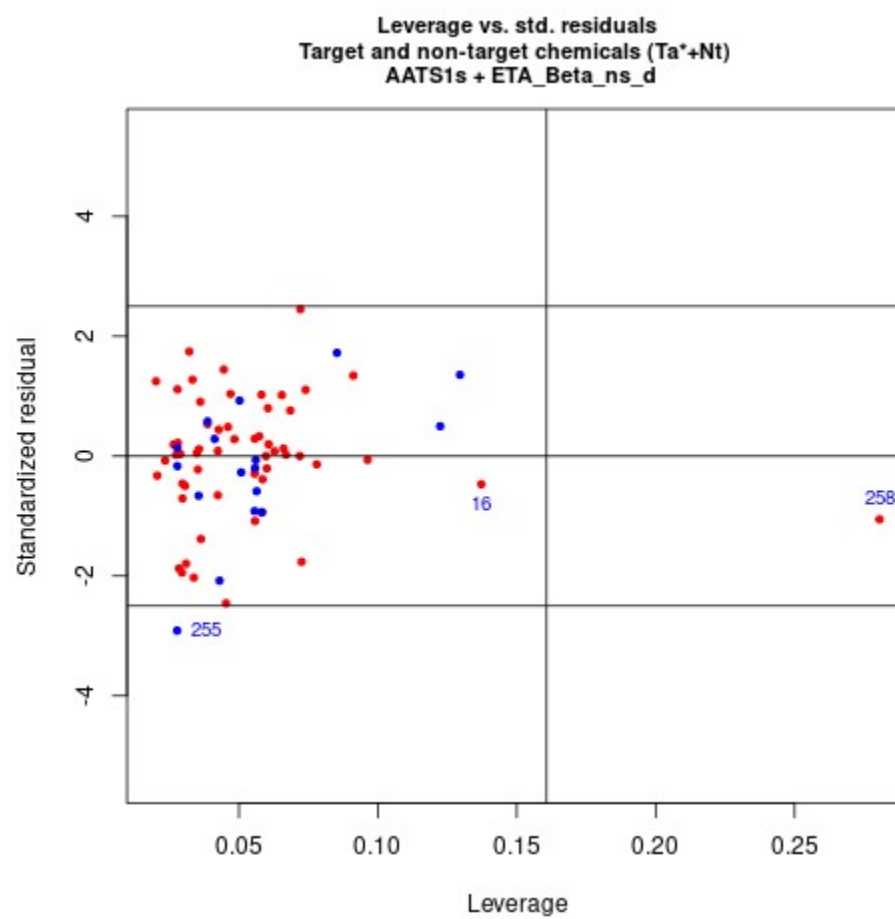

Figure S4. Performances of the target chemicals, by removing endpoint outliers, and non-target chemicals QSPR (Ta\*+Nt dataset).

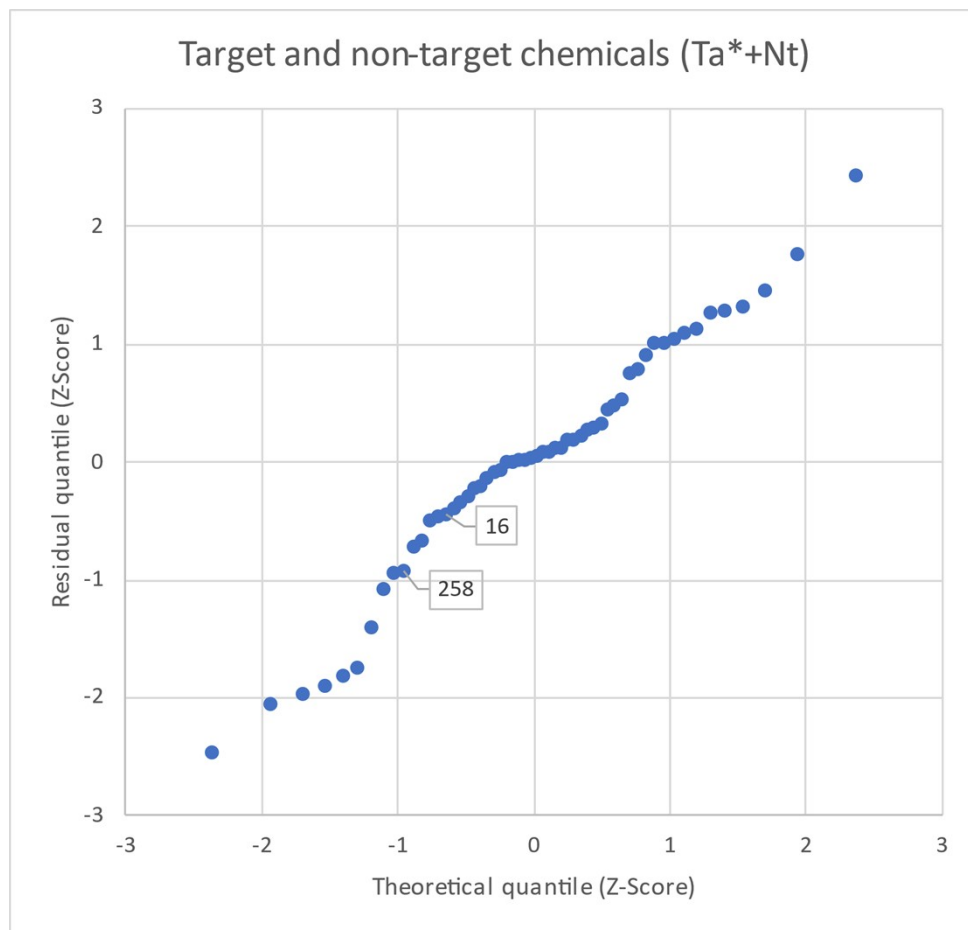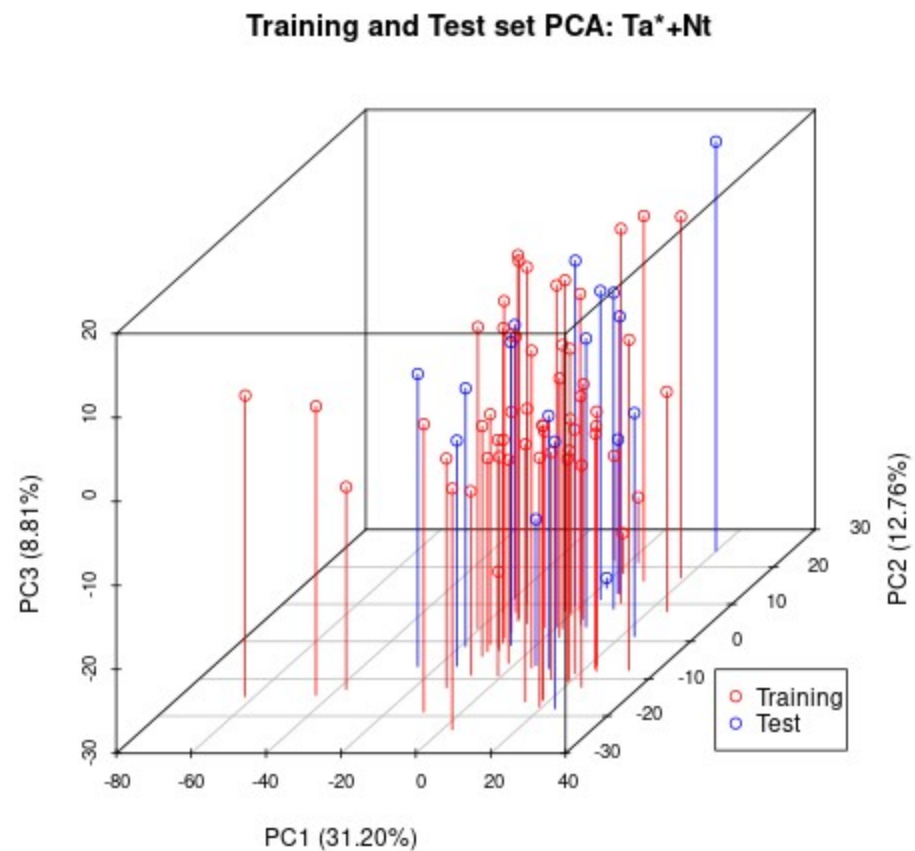

**Figure S4.** QQ chart and PCA for structural AD of training and test chemical of the target chemicals, by removing endpoint outliers, and non-target chemicals QSPR (Ta\*+Nt dataset).

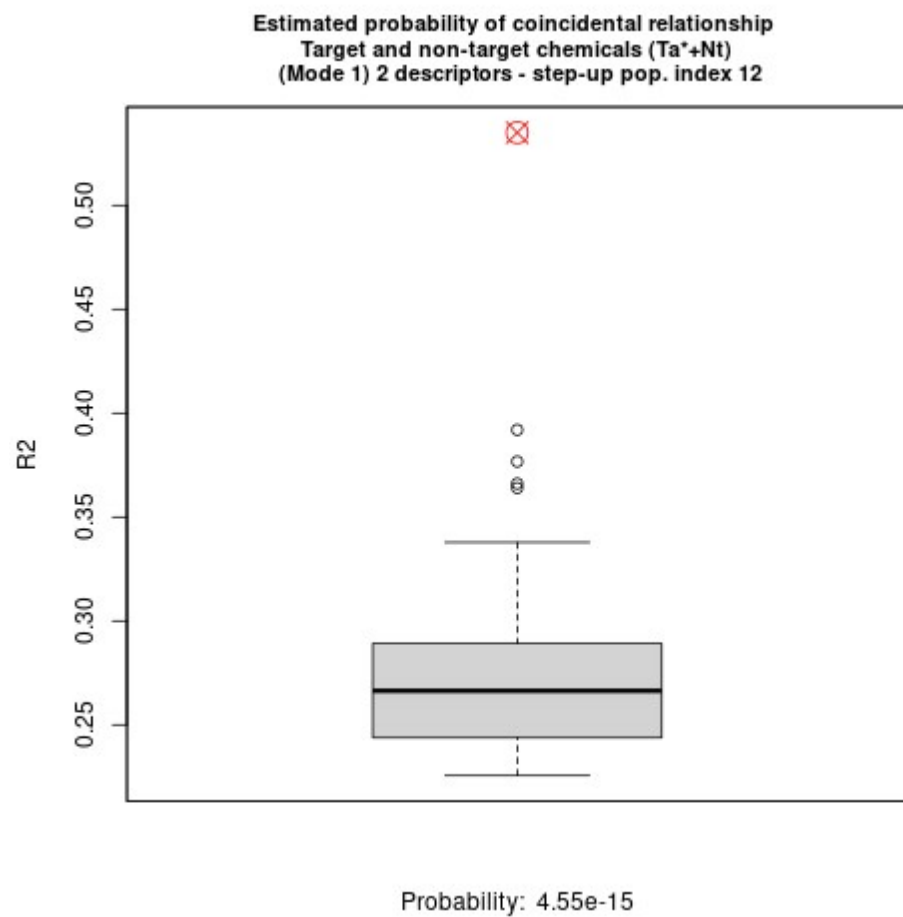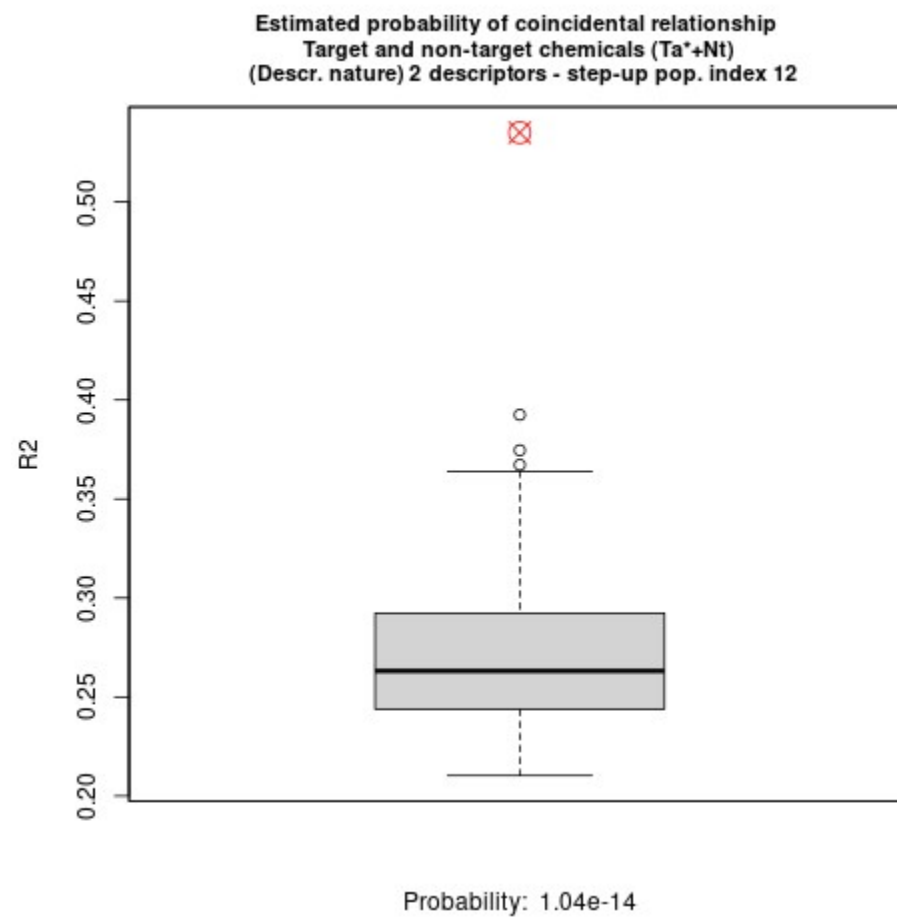

**Figure S4.** Probability of coincidental relationships of the target chemicals, by removing endpoint outliers, and non-target chemicals QSPR (Ta\*+Nt dataset).

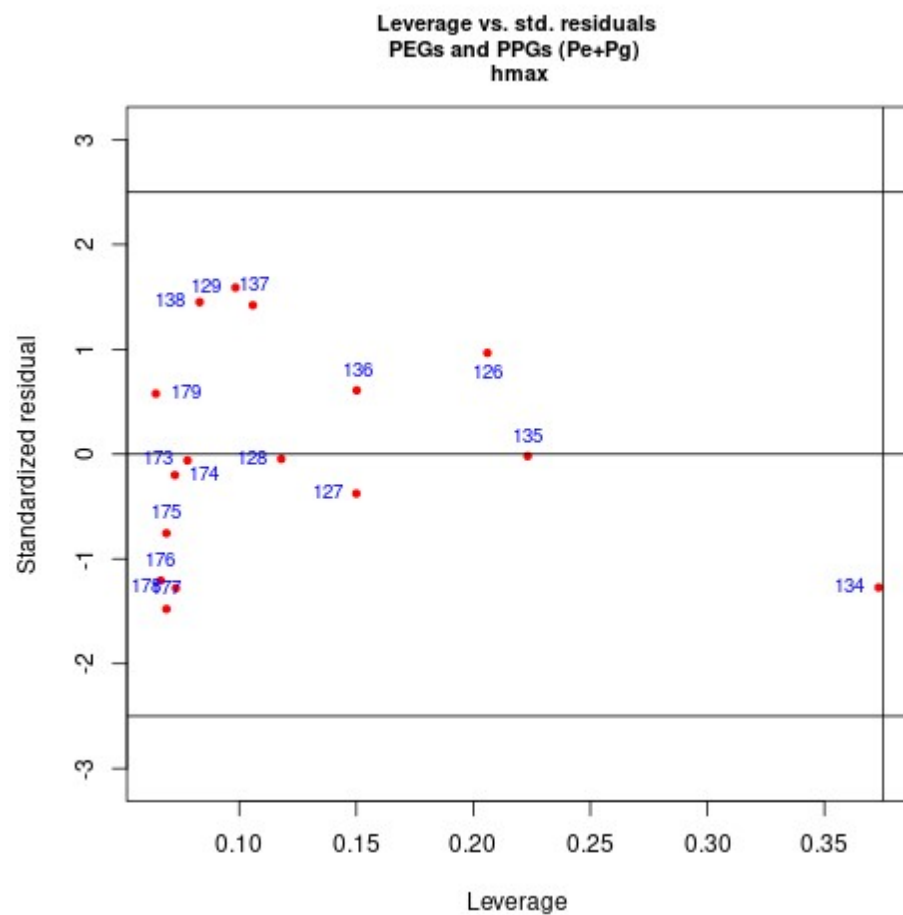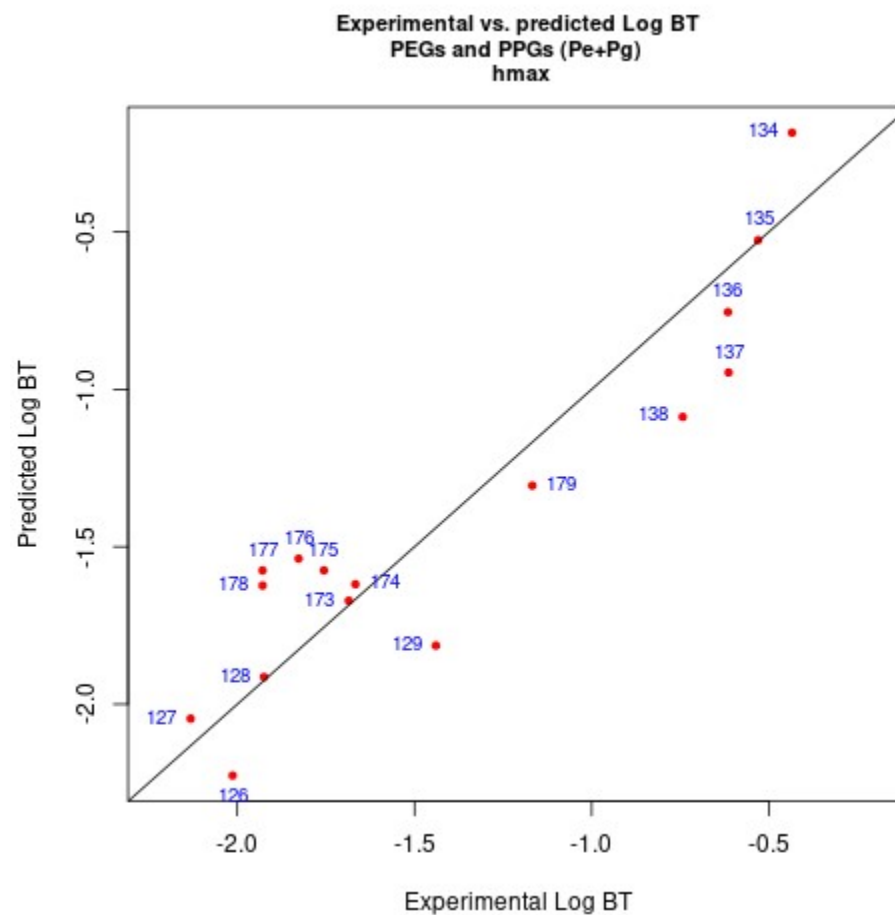

Figure S5. Performances of the PEGs and PPGs QSPR (Pe+Pg dataset).



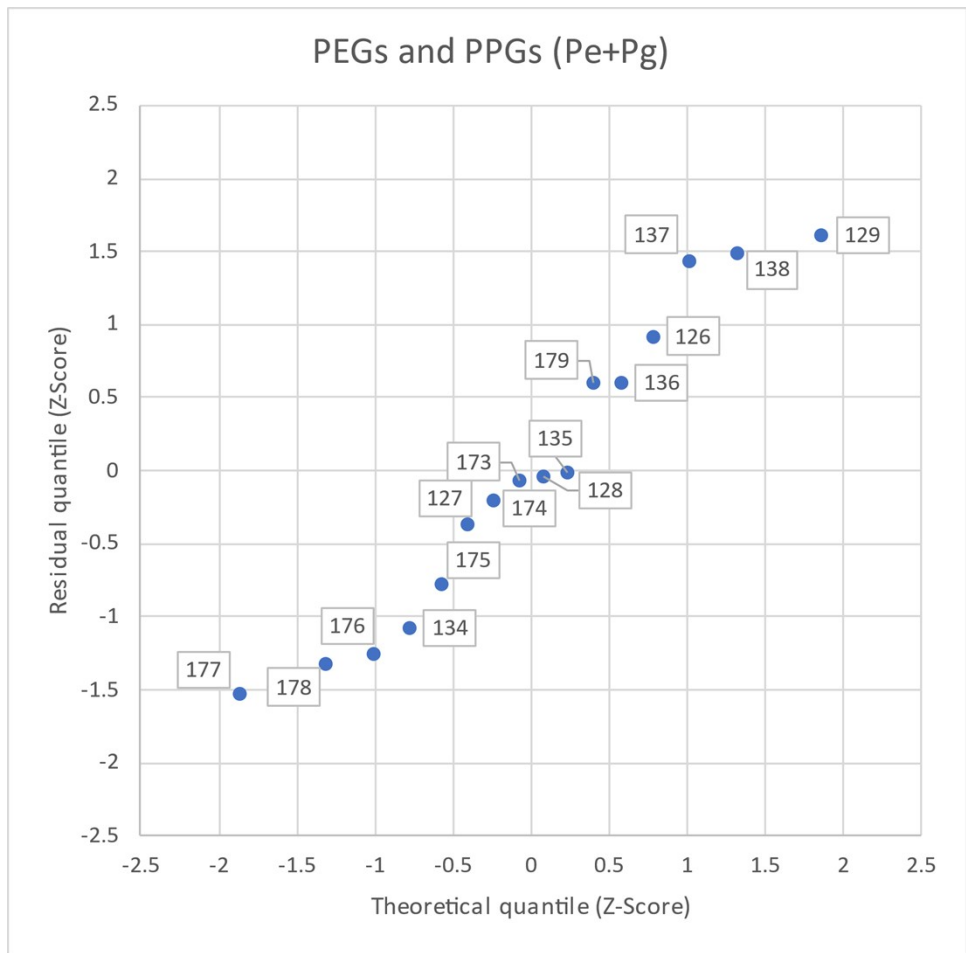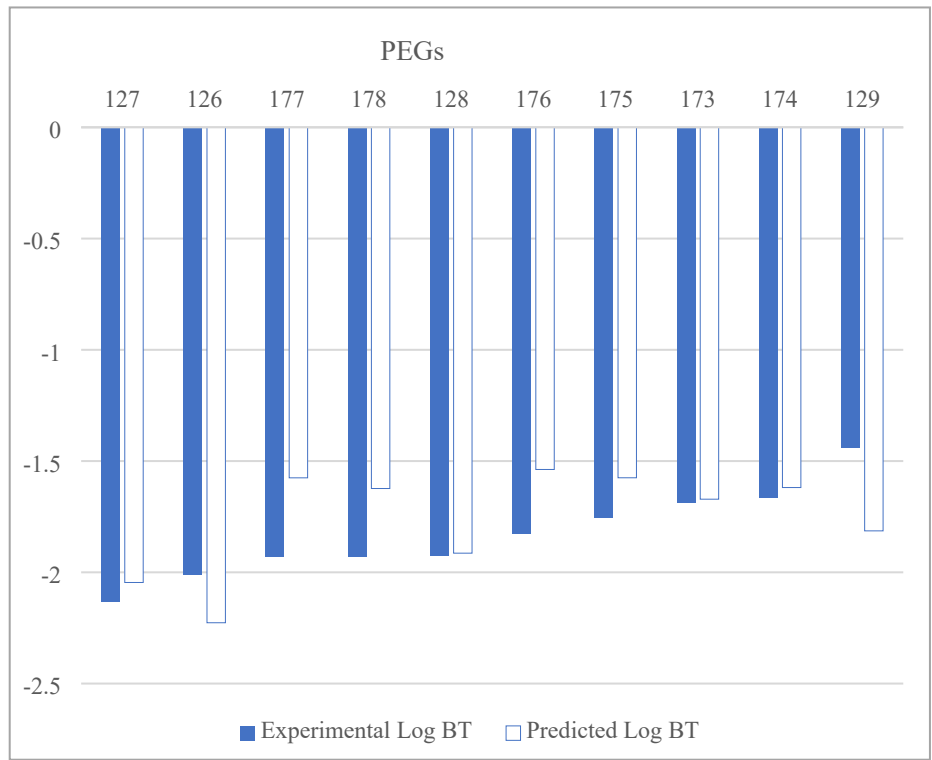

Figure S5. QQ chart of the PEGs and PPGs QSPR and Log BT distribution (Pe + Pg dataset).

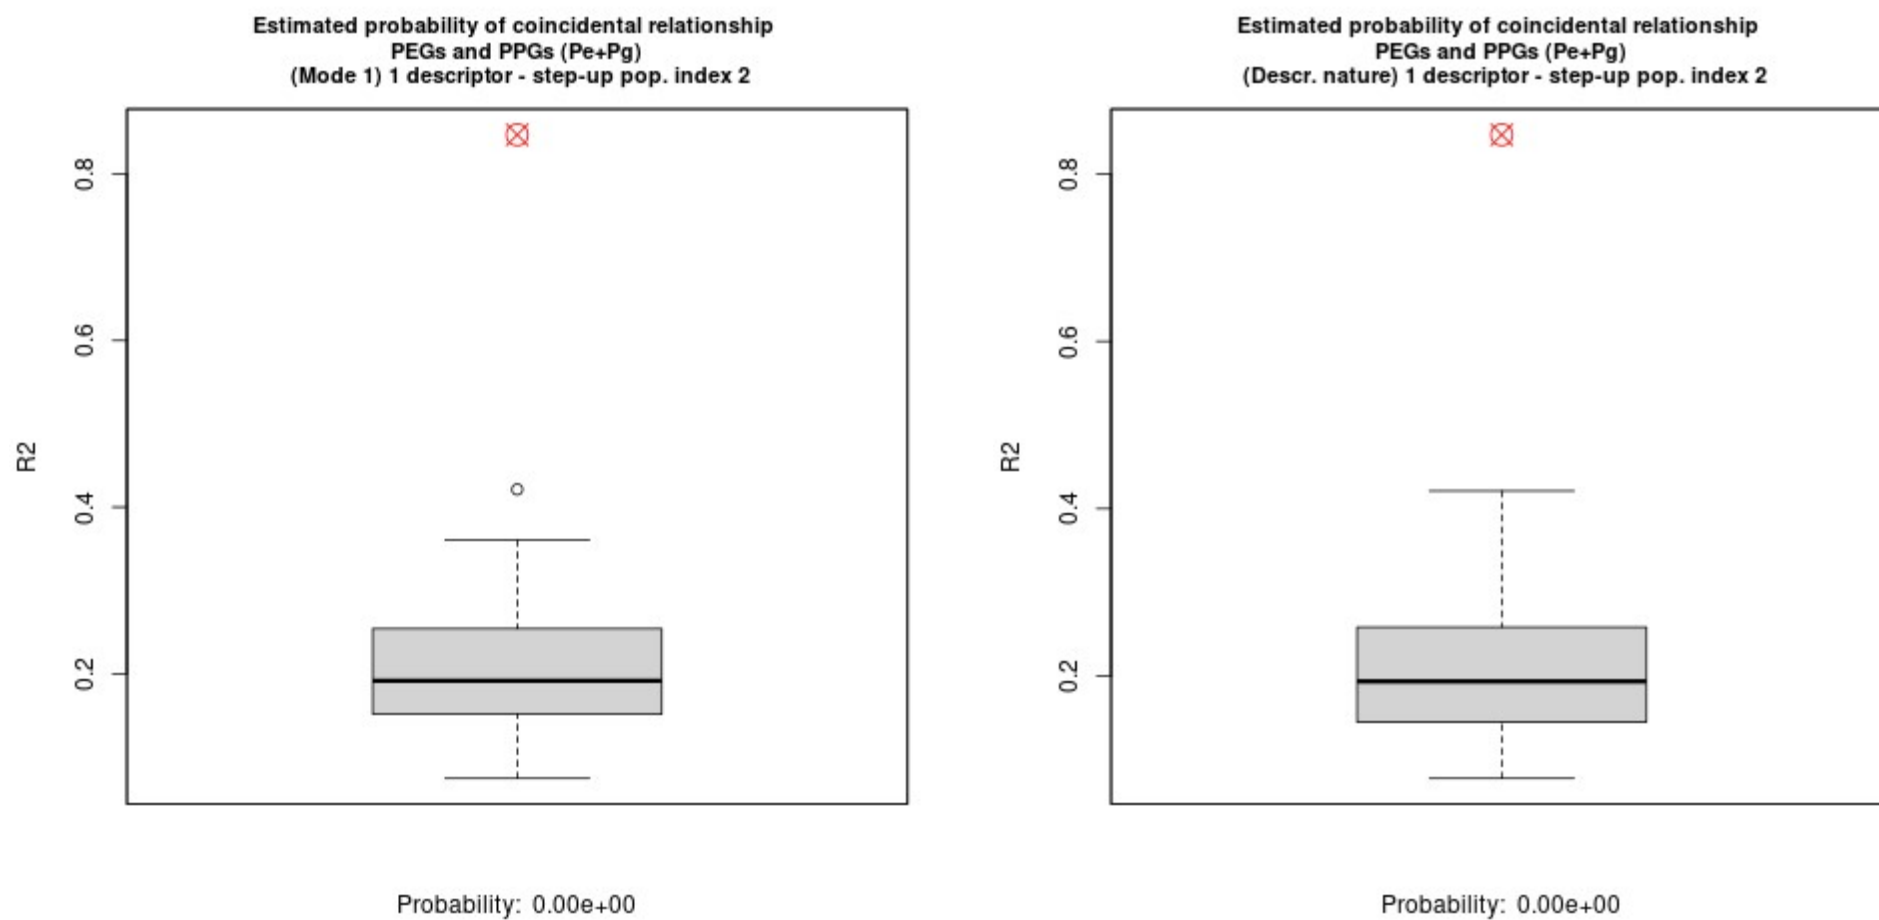

Figure S5. Probability of coincidental relationships of the PEGs and PPGs QSPR (Pe+Pg dataset).

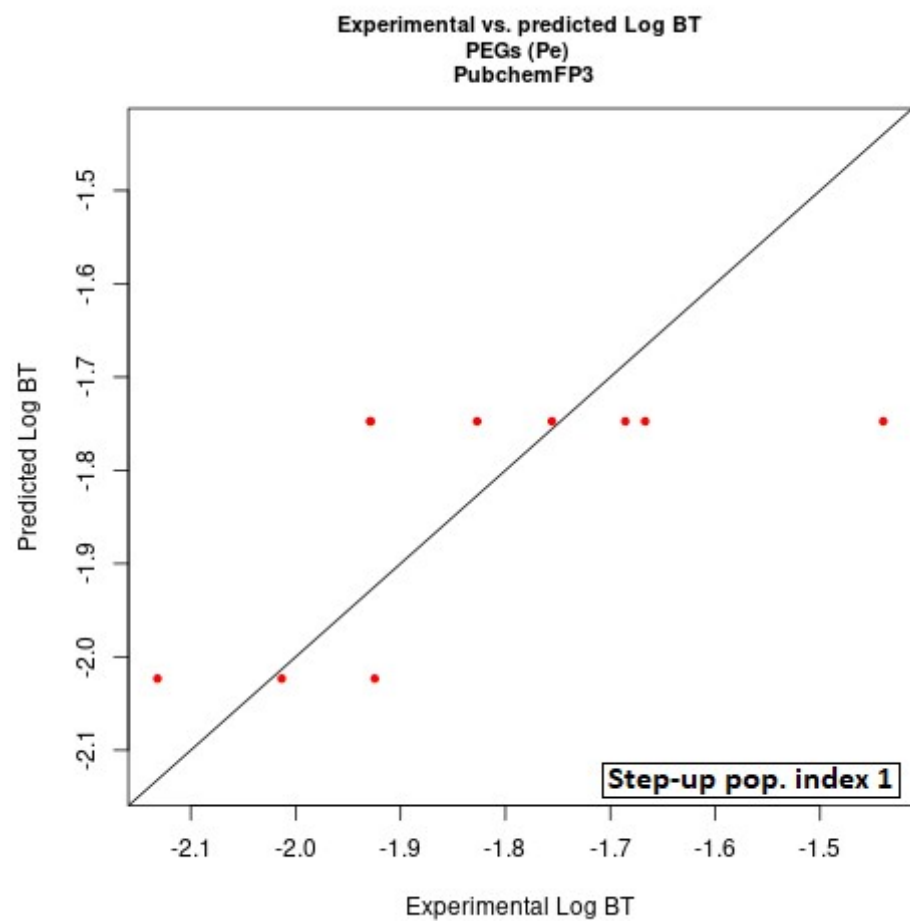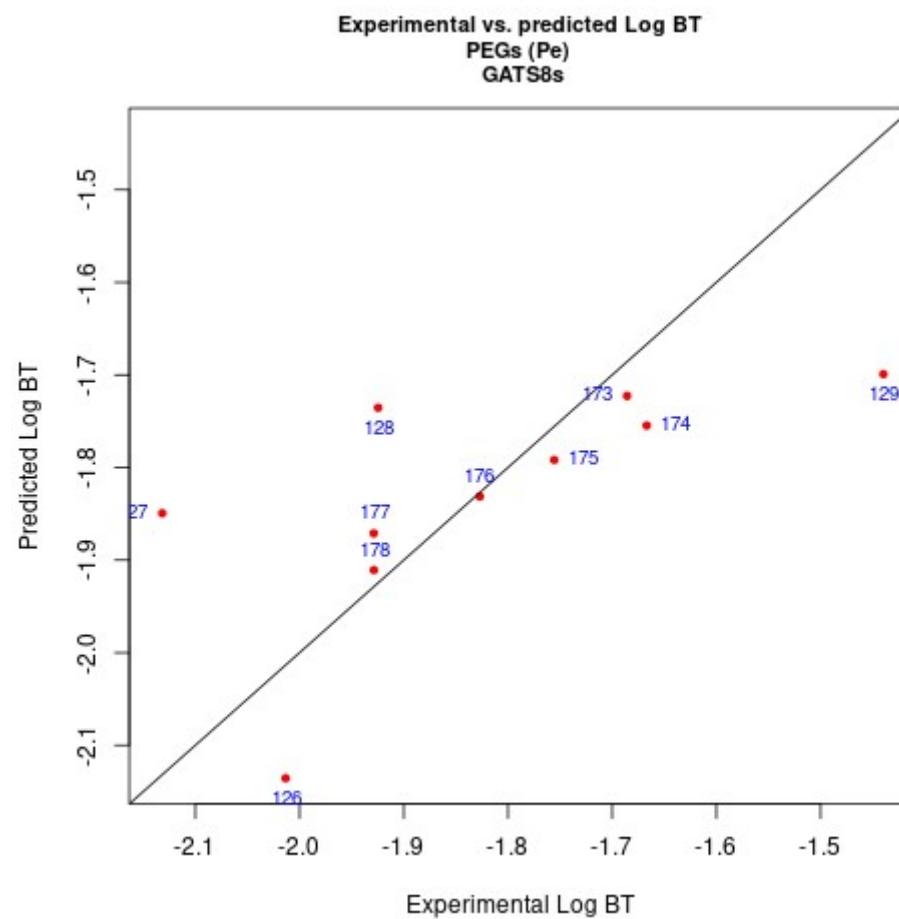

Figure S6. Performances of the PEGs QSPRs (Pe dataset).

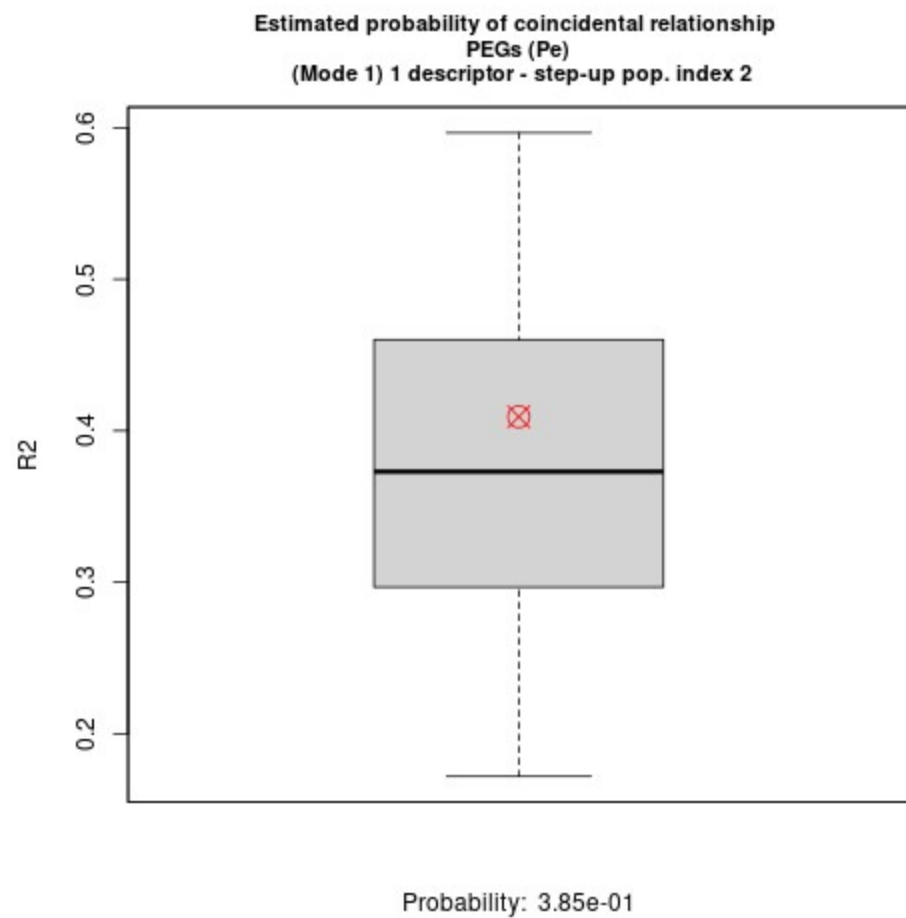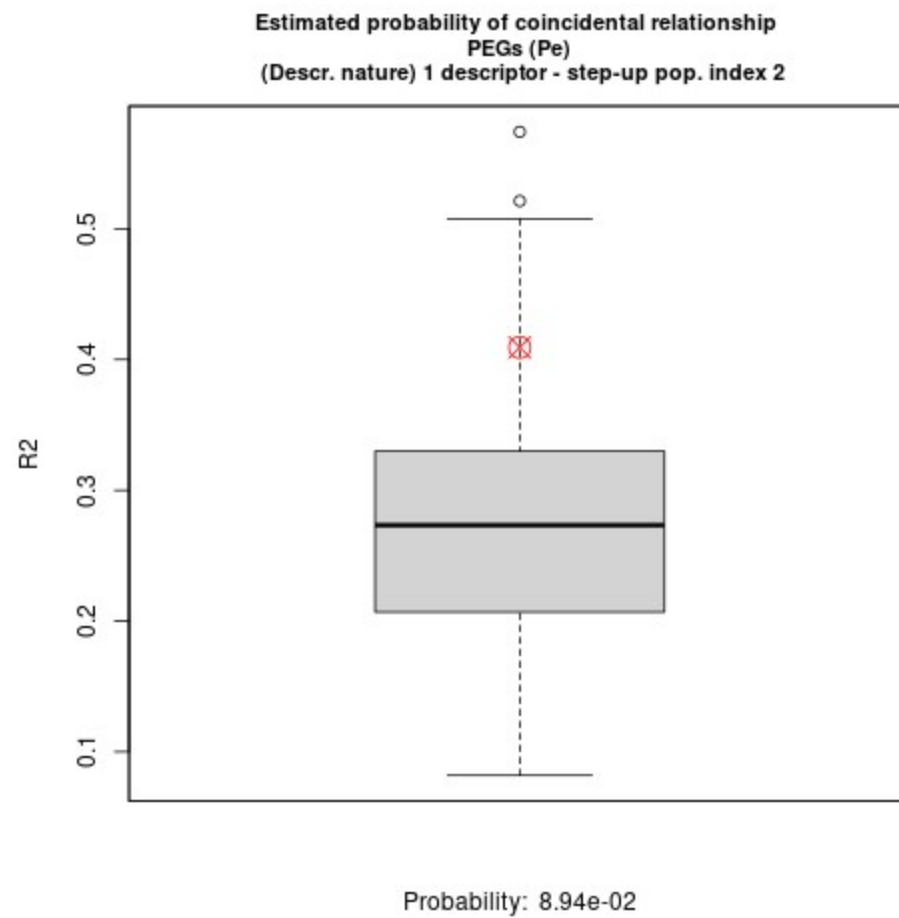

Figure S6. Probability of coincidental relationships of the PEGs selected QSPR (Pe dataset).

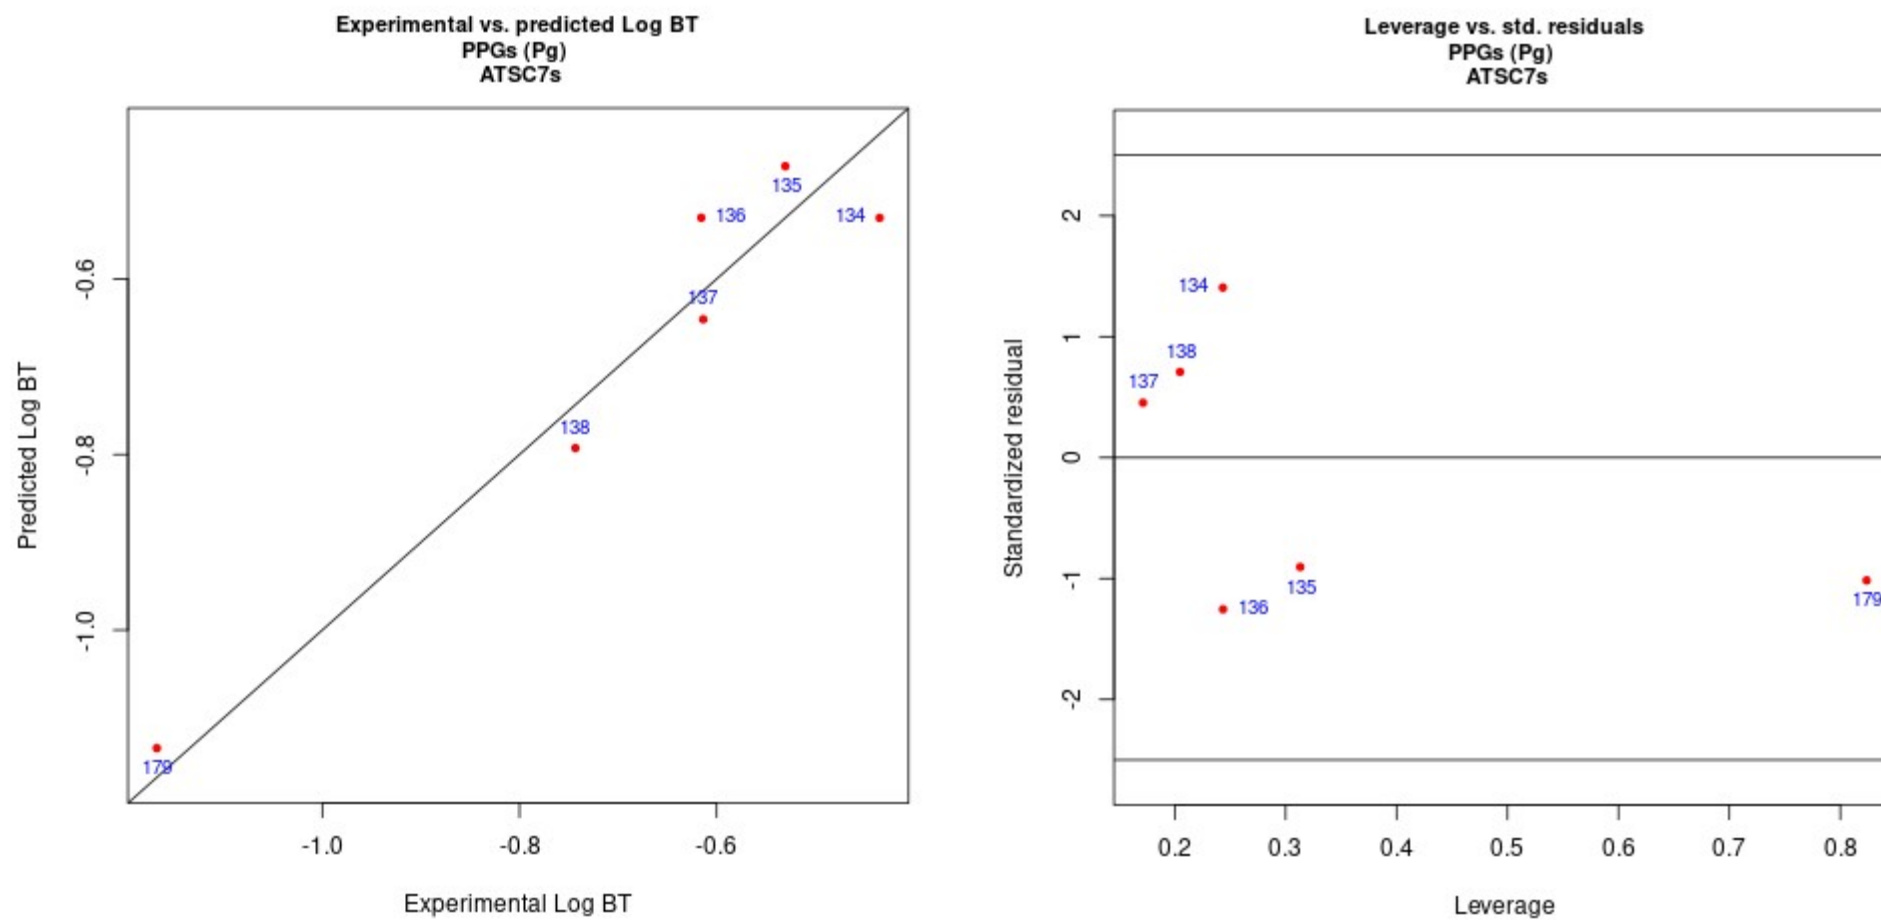

Figure S7. Performances and probability of coincidental relationships of the PPGs QSPR (Pg dataset).

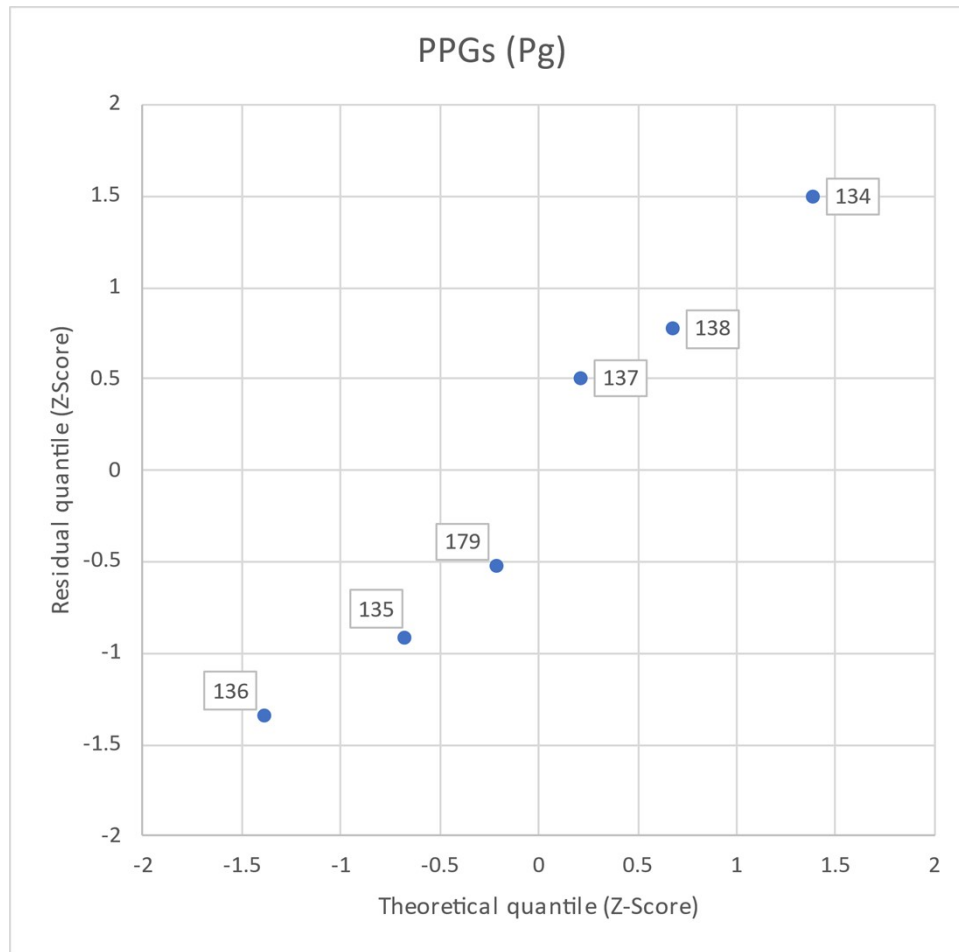

Figure S7. QQ chart of the PPGs QSPR (Pg dataset).

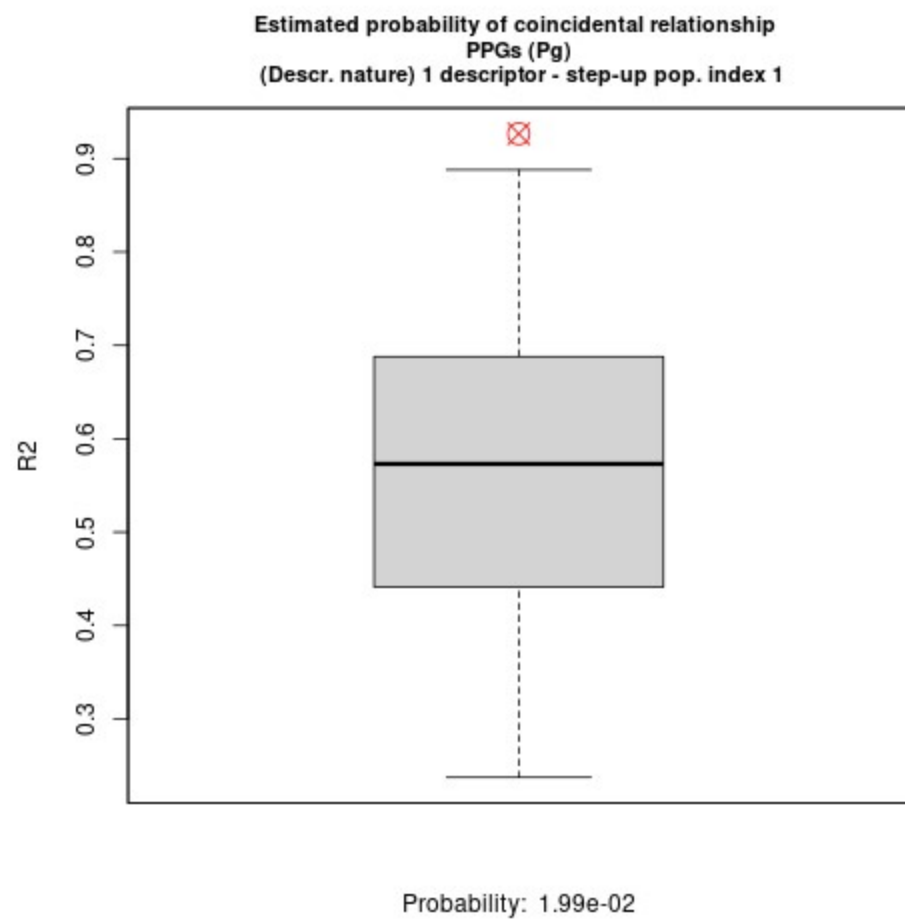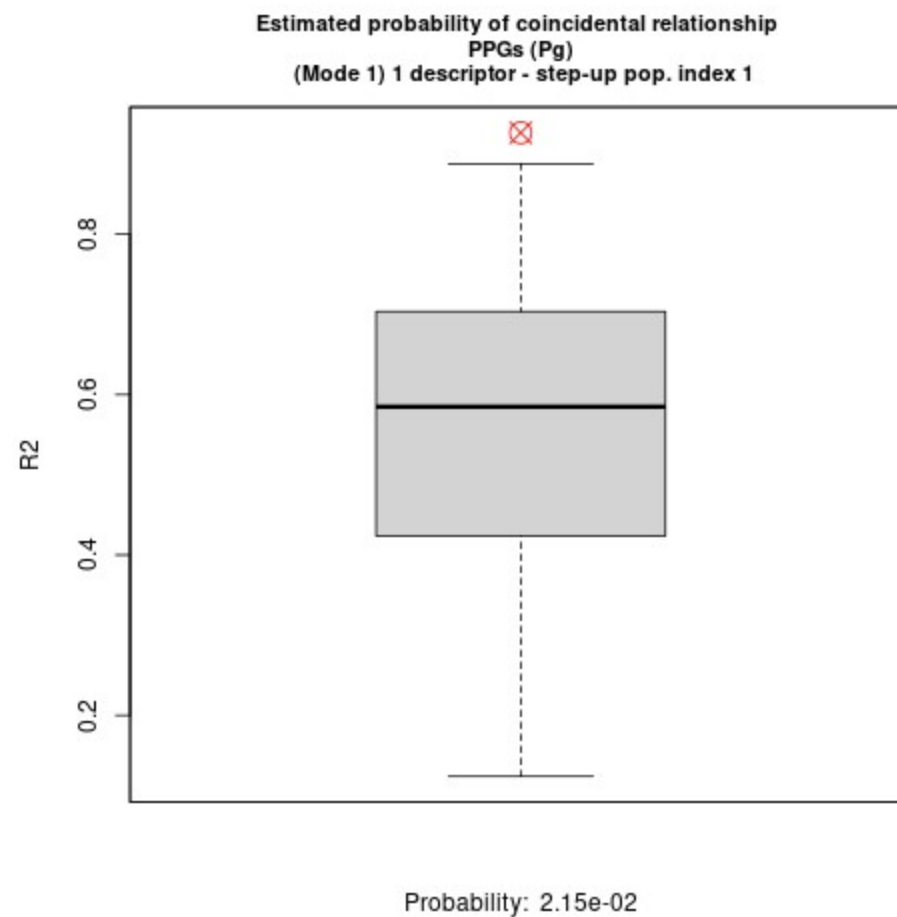

Figure S7. Performances and probability of coincidental relationships of the PPGs QSPR (Pg dataset).

## Statistics

Residuals:

| Min     | 1Q      | Median | 3Q     | Max    |
|---------|---------|--------|--------|--------|
| -1.3885 | -0.1321 | 0.1390 | 0.2377 | 0.7024 |

Coefficients:

|             | Estimate | Std. Error | t value | Pr(> t ) |     |
|-------------|----------|------------|---------|----------|-----|
| (Intercept) | -0.4400  | 0.1083     | -4.062  | 0.000608 | *** |
| MATS2m      | -6.1773  | 1.1140     | -5.545  | 1.99e-05 | *** |

---

Signif. codes: 0 '\*\*\*' 0.001 '\*\*' 0.01 '\*' 0.05 '.' 0.1 ' ' 1

Residual standard error: 0.5001 on 20 degrees of freedom

Multiple R-squared: 0.6059, Adjusted R-squared: 0.5862

F-statistic: 30.75 on 1 and 20 DF, p-value: 1.989e-05

-----  
ADDITIONAL STATISTICS  
-----

MAE training: 0.3359  
MAE bootstrap: 0.6782±0.0102

Q2: 0.4836  
Y-scrambled R2: 0.04742

-----  
DATASET  
-----

Filtered descriptors: 491  
Training set: 22

**Statistics S1.** Performances the target chemicals QSPR (Ta dataset).



```

Residuals:
      Min       1Q   Median       3Q      Max
-0.43975 -0.19601  0.02392  0.12064  0.58269

Coefficients:
              Estimate Std. Error t value Pr(>|t|)
(Intercept) -0.30779    0.06425  -4.790 0.000147 ***
MATS2m      -6.45112    0.66984  -9.631 1.59e-08 ***
---
Signif. codes:  0 '***' 0.001 '**' 0.01 '*' 0.05 '.' 0.1 ' ' 1

Residual standard error: 0.2811 on 18 degrees of freedom
Multiple R-squared:  0.8375, Adjusted R-squared:  0.8284
F-statistic: 92.75 on 1 and 18 DF,  p-value: 1.588e-08

-----
  ADDITIONAL STATISTICS
-----

MAE training: 0.2104
MAE bootstrap: 0.4389±0.01051

Q2: 0.6935
Y-Scrambled R2: 0.04037

-----
  DATASET
-----

Filtered descriptors: 529
Training set: 20

```

**Statistics S2.** Performances of the target chemicals, by removing endpoint outliers, QSPR (Ta\* dataset).

```

Residuals:
      Min       1Q   Median       3Q      Max
-1.66713 -0.31507  0.03371  0.33011  1.55018

Coefficients:
              Estimate Std. Error t value Pr(>|t|)
(Intercept)  -1.18414    0.23608  -5.016 4.23e-06 ***
VR3_Dzs       0.11155    0.02097   5.319 1.34e-06 ***
PubchemFP373 -0.62832    0.19197  -3.273  0.0017 **
PubchemFP420 -1.01904    0.18236  -5.588 4.71e-07 ***
---
Signif. codes:  0 '***' 0.001 '**' 0.01 '*' 0.05 '.' 0.1 ' ' 1

Residual standard error: 0.6651 on 66 degrees of freedom
Multiple R-squared:  0.5805, Adjusted R-squared:  0.5614
F-statistic: 30.44 on 3 and 66 DF, p-value: 1.794e-12

```

-----  
DESCRIPTORS CORRELATION  
-----

|              | VR3_Dzs | PubchemFP373 | PubchemFP420 |
|--------------|---------|--------------|--------------|
| VR3_Dzs      | 1.000   | -0.18        | -0.062       |
| PubchemFP373 | -0.180  | 1.00         | 0.200        |
| PubchemFP420 | -0.062  | 0.20         | 1.000        |

-----  
ADDITIONAL STATISTICS  
-----

MAE training: 0.4879  
MAE bootstrap: 0.7457±0.0033  
MAE test: 0.6921

Y-scrambled R2: 0.04461  
Q2: 0.5303

Standardized coefficients:  
VR3\_Dzs: 0.4314  
PubchemFP373: -0.2702  
PubchemFP420: -0.4545

-----  
DATASET  
-----

Filtered descriptors: 517  
Training set: 70  
Test set: 28

**Statistics S3.** Performances of the target and non-target chemicals QSPR (Ta+Nt dataset).

```

Residuals:
      Min       1Q   Median       3Q      Max
-1.70780 -0.31362  0.03023  0.41034  1.68073

Coefficients:
              Estimate Std. Error t value Pr(>|t|)
(Intercept)    1.7916     0.6444   2.780  0.0075 **
AATS1s        -0.9174     0.1759  -5.216 3.09e-06 ***
ETA_Beta_ns_d  0.9881     0.2140   4.617 2.51e-05 ***
---
Signif. codes:  0 '***' 0.001 '**' 0.01 '*' 0.05 '.' 0.1 ' ' 1

Residual standard error: 0.7119 on 53 degrees of freedom
Multiple R-squared:  0.535, Adjusted R-squared:  0.5175
F-statistic: 30.49 on 2 and 53 DF, p-value: 1.538e-09

```

```

-----
DESCRIPTORS CORRELATION
-----

```

```

              AATS1s ETA_Beta_ns_d
AATS1s         1.00      -0.21
ETA_Beta_ns_d -0.21       1.00

```

```

-----
ADDITIONAL STATISTICS
-----

```

```

MAE training: 0.5145
MAE bootstrap: 0.7502±0.0031
MAE test: 0.581

```

```

Y-Scrambled R2: 0.04709
Q2: 0.482

```

```

Standardized coefficients:
AATS1s: -0.4992
ETA_Beta_ns_d: 0.4419

```

```

-----
DATASET
-----

```

```

Filtered descriptors: 538
Training set: 56
Test set: 17

```

**Statistics S4.** Performances of the target chemicals, by removing endpoint outliers, and non-target chemicals QSPR (Ta\*+Nt dataset).

```

Residuals:
      Min       1Q   Median       3Q      Max
-0.35346 -0.19784 -0.01252  0.15756  0.37396

Coefficients:
              Estimate Std. Error t value Pr(>|t|)
(Intercept)   17.629      2.163   8.149 1.10e-06 ***
hmax          -27.639      3.141  -8.800 4.44e-07 ***
---
Signif. codes:  0 '***' 0.001 '**' 0.01 '*' 0.05 '.' 0.1 ' ' 1

Residual standard error: 0.2478 on 14 degrees of freedom
Multiple R-squared:  0.8469, Adjusted R-squared:  0.8359
F-statistic: 77.43 on 1 and 14 DF, p-value: 4.442e-07

```

```

-----
ADDITIONAL STATISTICS
-----

```

```

MAE training: 0.1927
MAE bootstrap: 0.2481±0.0034

```

```

Q2: 0.7987
Y-scrambled R2: 0.07912

```

```

Standardized coefficients:
hmax: -0.9203

```

```

-----
DATASET
-----

```

```

Filtered descriptors: 19
Training set: 16

```

**Statistics S5.** Performances of the PEGs and PPGs QSPR (Pe+Pg dataset).

```

Residuals:
      Min       1Q   Median       3Q      Max
-0.28239 -0.04762  0.02026  0.07508  0.25938

Coefficients:
            Estimate Std. Error t value Pr(>|t|)
(Intercept)    4.992     2.899   1.722  0.1233
GATS8s        -6.497     2.760  -2.354  0.0464 *
---
Signif. codes:  0 '***' 0.001 '**' 0.01 '*' 0.05 '.' 0.1 ' ' 1

Residual standard error: 0.1627 on 8 degrees of freedom
Multiple R-squared:  0.4092, Adjusted R-squared:  0.3353
F-statistic: 5.541 on 1 and 8 DF, p-value: 0.0464

```

```

-----
ADDITIONAL STATISTICS
-----

```

```

MAE training: 0.1094

Q2: -0.3731
Y-Scrambled R2: 0.1143

Standardized coefficients:
GATS8s: -0.6397

```

```

-----
DATASET
-----

```

```

Filtered descriptors: 27
Training set: 10

```

**Statistics S6.** Performances of the PEGs QSPR (Pe dataset).

Residuals:  
134 135 136 137 138 179  
0.09569 -0.05865 -0.08537 0.03228 0.04941 -0.03336

Coefficients:  
Estimate Std. Error t value Pr(>|t|)  
(Intercept) -0.07418 0.09168 -0.809 0.46387  
ATSC7s 0.70693 0.09959 7.099 0.00208 \*\*

---  
Signif. codes: 0 '\*\*\*' 0.001 '\*\*' 0.01 '\*' 0.05 '.' 0.1 ' ' 1

Residual standard error: 0.07823 on 4 degrees of freedom  
Multiple R-squared: 0.9265, Adjusted R-squared: 0.9081  
F-statistic: 50.39 on 1 and 4 DF, p-value: 0.00208

-----  
ADDITIONAL STATISTICS  
-----

MAE training: 0.05913

Q2: 0.7681

Y-scrambled R2: 0.1913

Standardized coefficients:

ATSC7s: 0.9625

-----  
DATASET  
-----

Filtered descriptors: 10

Training set: 6

**Statistics S7.** Performances of the PPGs QSPR (Pg dataset).

## Bootstrap analysis

Generated bootstrap folds per iteration

| Run | No. folds | Run | No. folds |
|-----|-----------|-----|-----------|
| 1   | 38        | 14  | 42        |
| 2   | 38        | 15  | 44        |
| 3   | 35        | 16  | 43        |
| 4   | 38        | 17  | 36        |
| 5   | 32        | 18  | 37        |
| 6   | 44        | 19  | 45        |
| 7   | 41        | 20  | 36        |
| 8   | 44        | 21  | 59        |
| 9   | 40        | 22  | 55        |
| 10  | 36        | 23  | 44        |
| 11  | 48        | 24  | 35        |
| 12  | 39        | 25  | 48        |
| 13  | 37        |     |           |

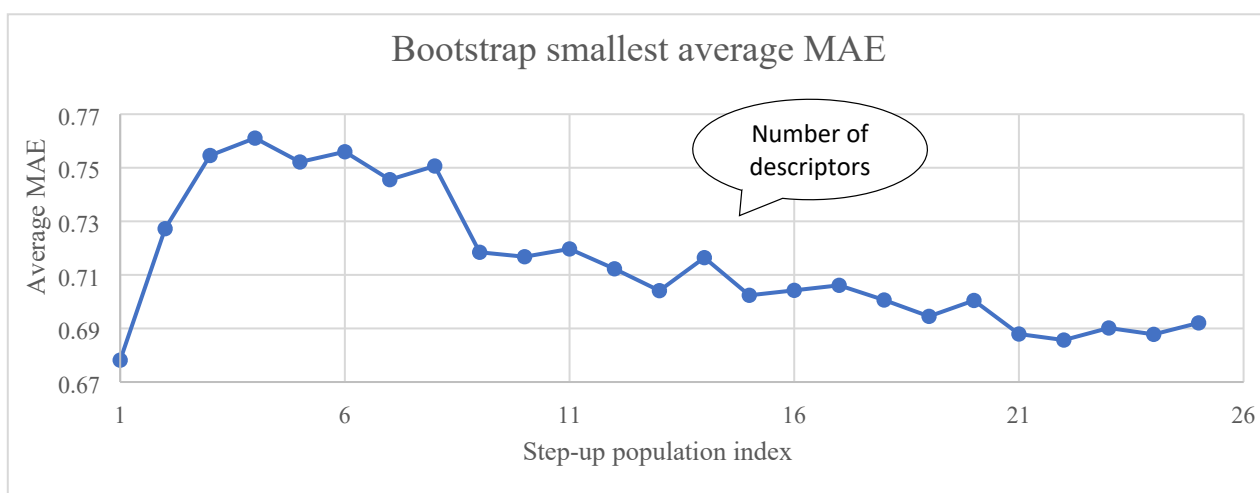

Bootstrap average MAE (+/- 1SE) step-up pop. index 1  
Target chemicals (Ta)

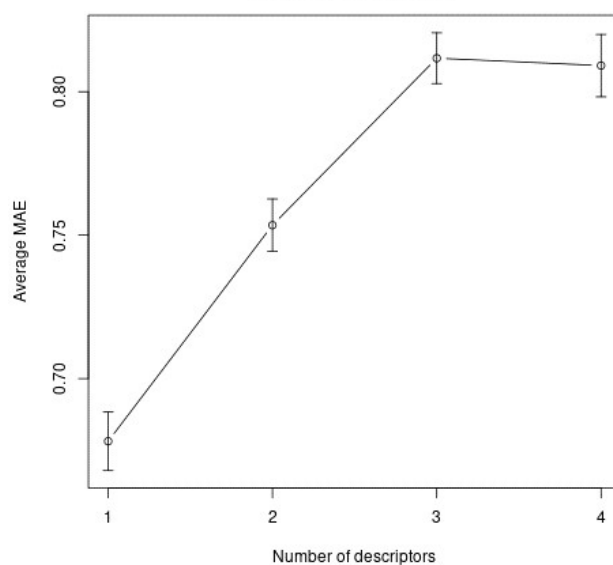

**Bootstrap analysis S1.** Selection of the best candidate of target chemicals QSPR (Ta dataset).



### Generated bootstrap folds per iteration

| Run | No. folds | Run | No. folds |
|-----|-----------|-----|-----------|
| 1   | 39        | 14  | 45        |
| 2   | 30        | 15  | 27        |
| 3   | 37        | 16  | 55        |
| 4   | 36        | 17  | 33        |
| 5   | 32        | 18  | 44        |
| 6   | 44        | 19  | 38        |
| 7   | 33        | 20  | 36        |
| 8   | 44        | 21  | 38        |
| 9   | 47        | 22  | 43        |
| 10  | 36        | 23  | 41        |
| 11  | 35        | 24  | 37        |
| 12  | 36        | 25  | 36        |
| 13  | 48        |     |           |

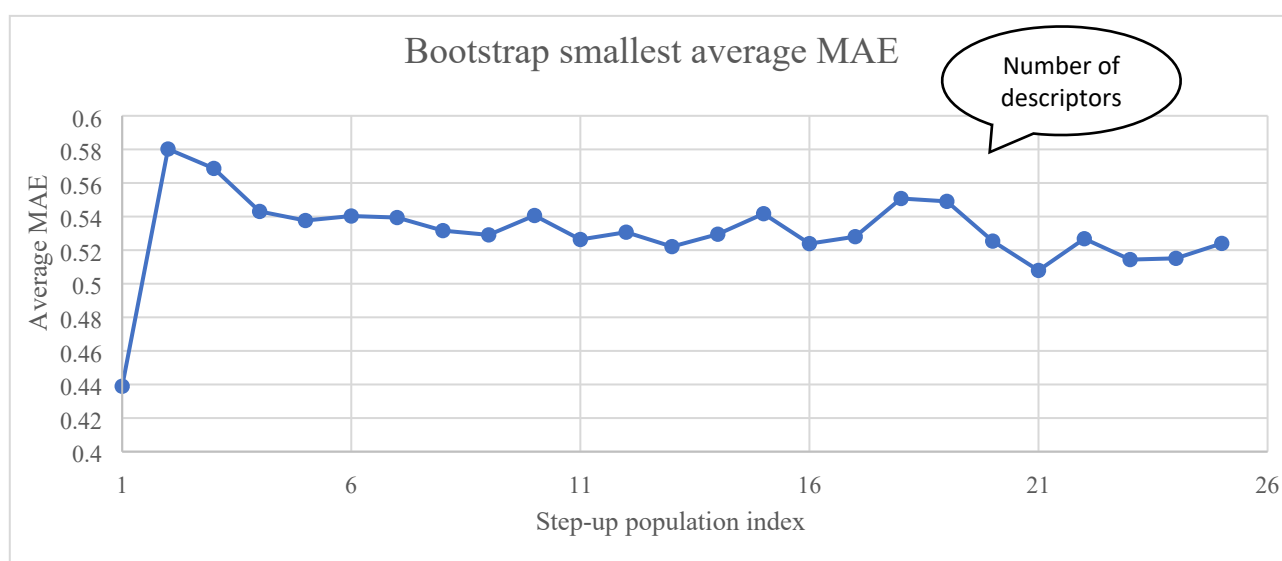

**Bootstrap average MAE (+/- 1SE) step-up pop. index 1  
Target chemicals (Ta\*)**

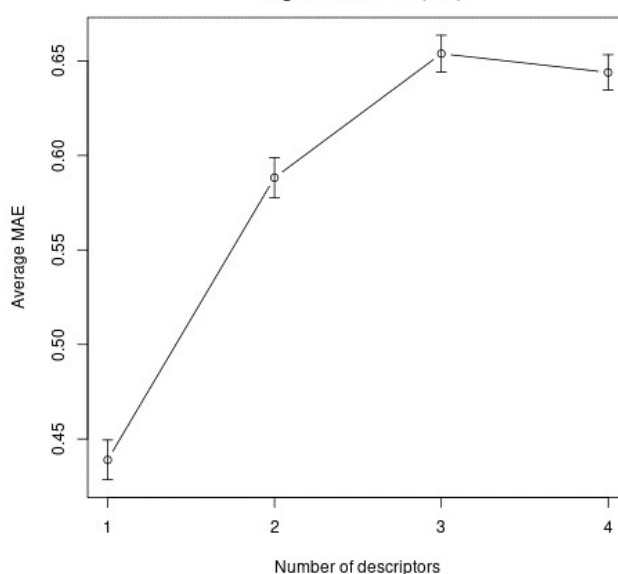

**Bootstrap analysis S2.** Selection of the best candidate of target chemicals, by removing endpoint outliers, QSPR (Ta\* dataset).

| Run | No. Folds | Run | No. Folds |
|-----|-----------|-----|-----------|
| 1   | 45        | 14  | 64        |
| 2   | 64        | 15  | 69        |
| 3   | 55        | 16  | 50        |
| 4   | 55        | 17  | 46        |
| 5   | 47        | 18  | 47        |
| 6   | 45        | 19  | 59        |
| 7   | 58        | 20  | 47        |
| 8   | 58        | 21  | 63        |
| 9   | 53        | 22  | 55        |
| 10  | 67        | 23  | 54        |
| 11  | 46        | 24  | 60        |
| 12  | 67        | 25  | 55        |
| 13  | 52        |     |           |

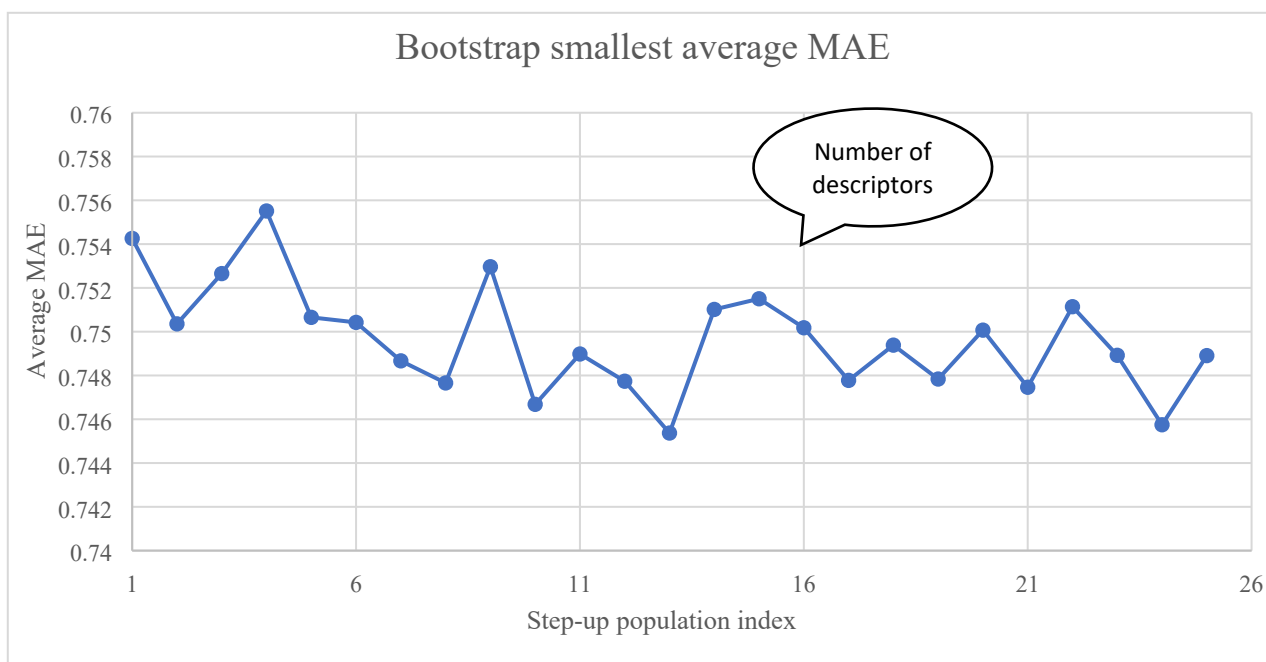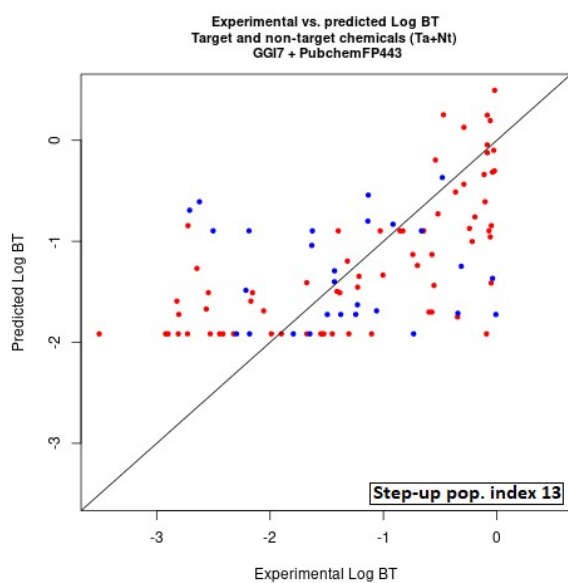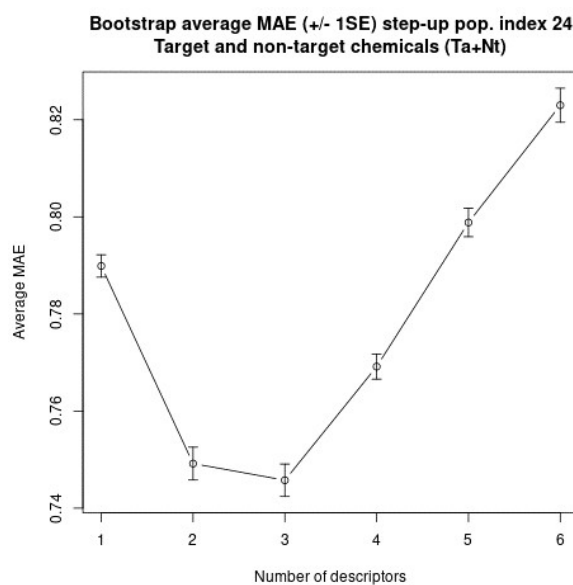

**Bootstrap analysis S3.** Selection of the best candidate of target and non-target chemicals QSPR (Ta+Nt dataset).

| Run | No. Folds | Run | No. Folds |
|-----|-----------|-----|-----------|
| 1   | 62        | 14  | 49        |
| 2   | 53        | 15  | 50        |
| 3   | 47        | 16  | 52        |
| 4   | 47        | 17  | 50        |
| 5   | 44        | 18  | 45        |
| 6   | 49        | 19  | 49        |
| 7   | 54        | 20  | 47        |
| 8   | 52        | 21  | 52        |
| 9   | 51        | 22  | 47        |
| 10  | 52        | 23  | 54        |
| 11  | 45        | 24  | 52        |
| 12  | 52        | 25  | 49        |
| 13  | 53        |     |           |

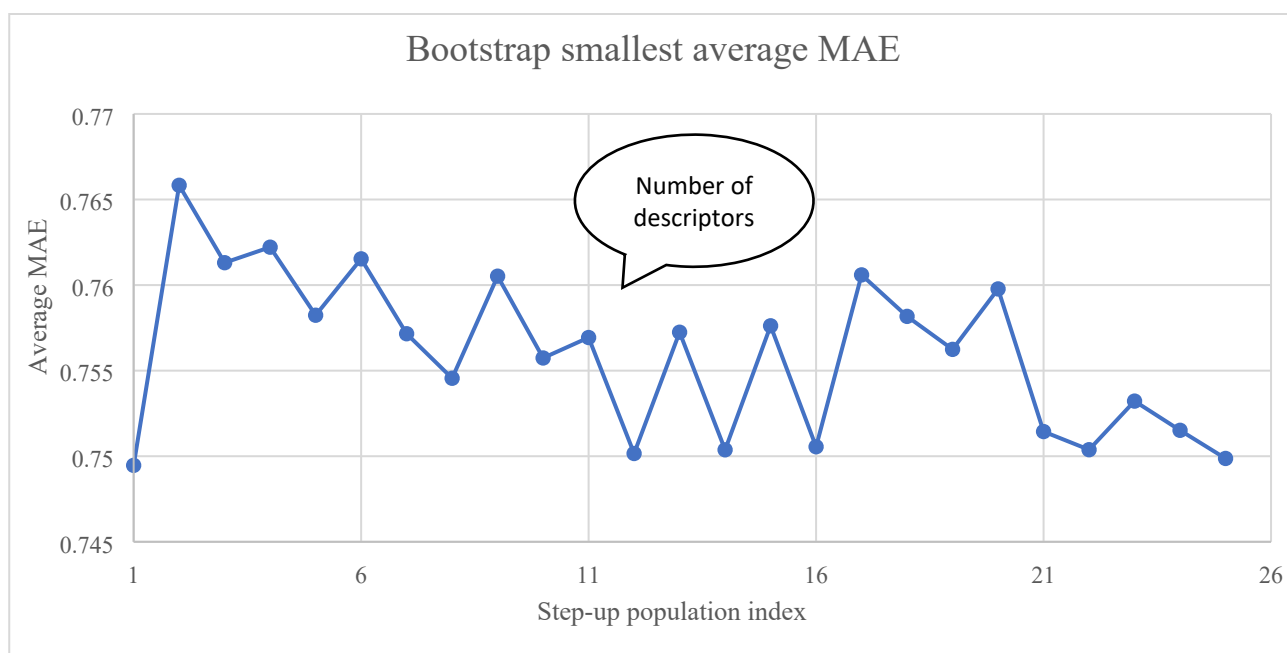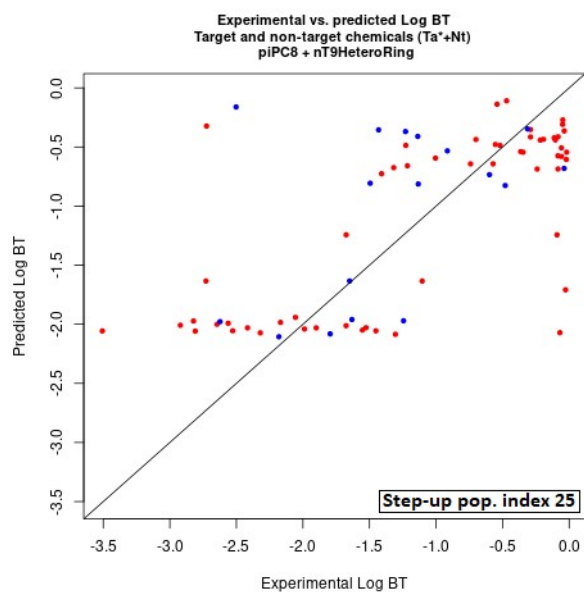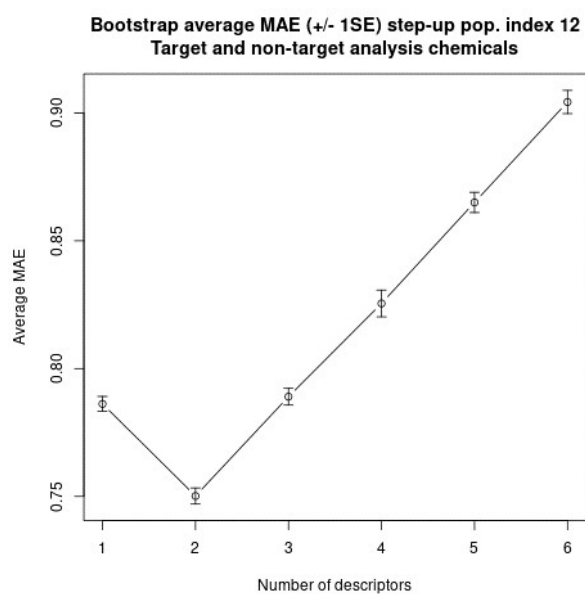

**Bootstrap analysis S4.** Selection of the best candidate of target chemicals, by removing endpoint outliers, and non-target chemicals QSPR (Ta\*+Nt dataset).

| Run | No. Folds | Run | No. Folds |
|-----|-----------|-----|-----------|
| 1   | 27        | 14  | 26        |
| 2   | 43        | 15  | 40        |
| 3   | 46        | 16  | 38        |
| 4   | 32        | 17  | 29        |
| 5   | 36        | 18  | 39        |
| 6   | 40        | 19  | 32        |
| 7   | 47        | 20  | 41        |
| 8   | 41        | 21  | 39        |
| 9   | 33        | 22  | 31        |
| 10  | 38        | 23  | 49        |
| 11  | 35        | 24  | 43        |
| 12  | 43        | 25  | 38        |
| 13  | 43        |     |           |

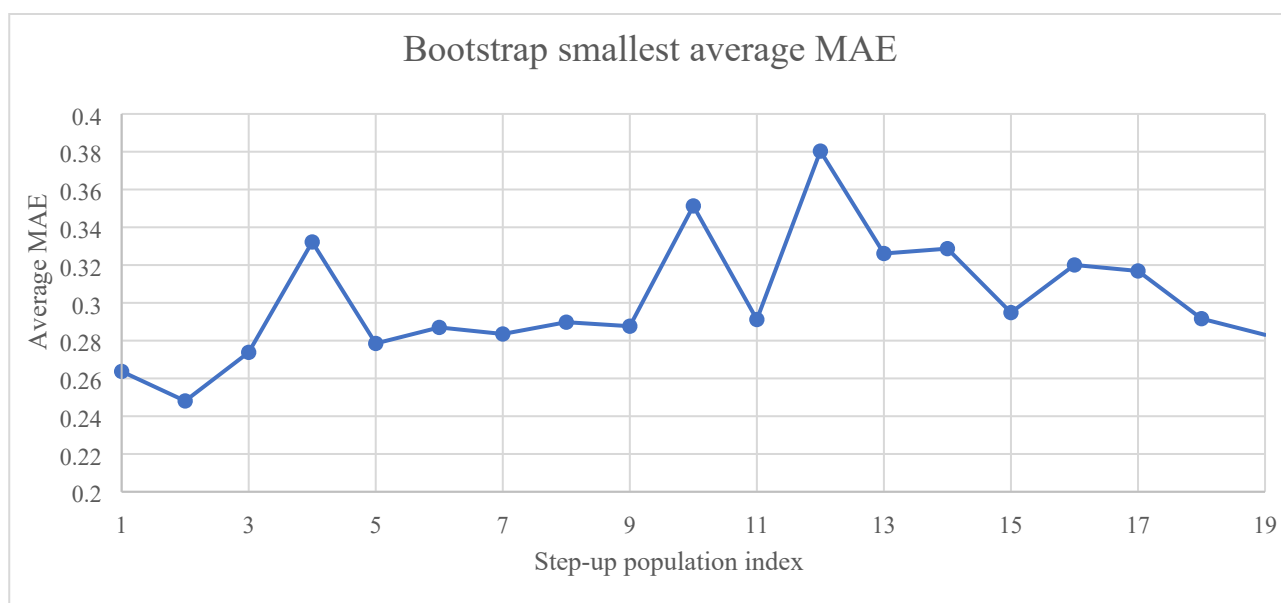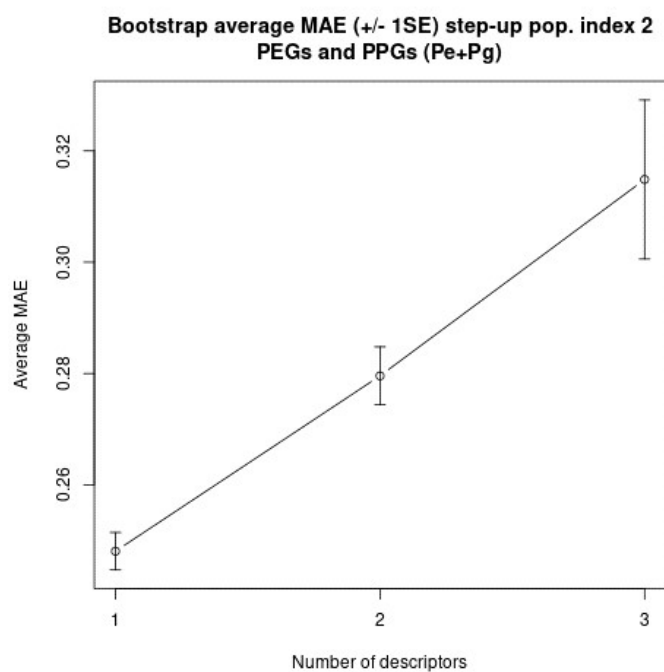

**Bootstrap analysis S5.** Selection of the best candidate of PEGs and PPGs QSPR (Pe+Pg dataset).

## Methods

### Method S1. Leave-one-out bootstrap.

Each bootstrap training set was composed by sampling with replacement from the original training set, keeping the same size. The endpoint of the chemicals not included in the bootstrap training set i.e., the left-out ones, was predicted by applying the QSPR with the best objective function value ( $R^2$ ) from the step-up population, and the residuals collected. The bootstrap procedure, and the corresponding variable selection procedure, was reiterated until all chemicals were left out at least once. To improve representativeness of the left-out chemicals (some may be left out many times while other only one time), the whole procedure was repeated 5 times without resetting the random seed. The mean absolute error (MAE) was calculated using the collected residuals and later associated to the corresponding QSPR developed using the original training set.

The whole procedure, here referred as a run, was repeated 25 times starting from different random seeds.

See **Appendix** for algorithms.

### Method S2. Selection of the best QSPRs from the step-up population.

In the following part the default step-up population of 25 QSPRs is assumed. Once the step-up procedure has been completed, it results in a population of QSPRs for each number of descriptors i.e., 25 one-descriptor QSPRs, 25 two-descriptors QSPRs and so on. Each population contains the 25 best fitting QSPRs, indexed from 1 (highest fitting) to 25 (lowest fitting). See the exemplificative table below, assuming that the step-up procedure has been run up to 6 descriptors. Let us call it “table of candidate QSPRs”.

| Index | 1-descriptor QSPR $R^2$ | 2-descriptors QSPR $R^2$ | ... | 6-descriptors QSPR $R^2$ |
|-------|-------------------------|--------------------------|-----|--------------------------|
| 1     | 0.70                    | 0.84                     | ... | 0.94                     |
| 2     | 0.67                    | 0.82                     | ... | 0.92                     |
| ...   | ...                     | ...                      | ... | ...                      |
| 25    | 0.58                    | 0.71                     | ... | 0.87                     |

**Table 1**

To detect which one has the lowest chance of being overfitted, for each step-up index (see Index, Table 1) the step-up procedure has been run 25 times by using training sets built using the leave-one-out bootstrap procedure, then the average of the smallest MAEs, and the corresponding one standard error, are calculated and collected, as exemplified in the table below (Table 2).

| Index | 1-descriptor QSPR bootstrap | 2-descriptors QSPR bootstrap | ... | 6-descriptors QSPR bootstrap |
|-------|-----------------------------|------------------------------|-----|------------------------------|
| 1     | average MAE and 1SE         | average MAE and 1SE          | ... | average MAE and 1SE          |
| 2     | average MAE and 1SE         | average MAE and 1SE          | ... | average MAE and 1SE          |
| ...   | ...                         | ...                          | ... |                              |
| 25    | average MAE and 1SE         | average MAE and 1SE          | ... | average MAE and 1SE          |

**Table 2**

For each step-up index (see Table 2), the smallest average MAE has been collected as in the example of the table below.

| Index | Smallest average MAE | Corresponding QSPR |
|-------|----------------------|--------------------|
| 1     | 0.88                 | 4-descriptors QSPR |
| 2     | 0.75                 | 3-descriptors QSPR |
| ...   | ...                  | ...                |
| 25    | 1.02                 | 4-descriptors QSPR |

**Table 3**

The smallest average MAE value found in Table 3 is then used to select the step-up population index of Table 2. Let us assume that the smallest average MAE is for the 3-descriptors QSPR, index 2 in Table 3. Then, from Table 2, index 2, the corresponding average MAEs and corresponding SEs, are plotted as in the figure below example.

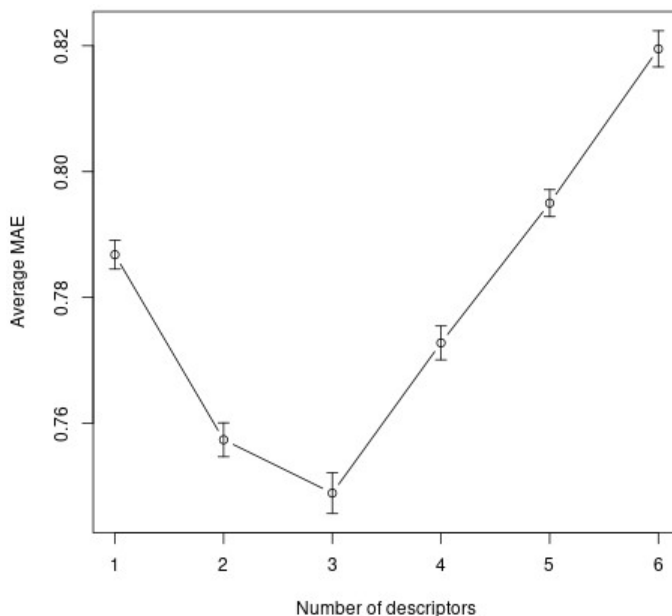

The one standard error rule<sup>1</sup> states that the most parsimonious model (QSPR) is the one using the smallest number of predictors (descriptors) within one standard error from the model (QSPR) having the smallest estimated prediction error (in this case the average MAE of the 3-descriptors

<sup>1</sup> Breiman L. et al., Stone C.J. Classification and regression trees. Chapman & Hall. New York. 1984.

QSPR). Since, from the chart above, the 2-descriptors QSPR is outside the one standard error of the 3-descriptors QSPR, the latter is finally selected (in case the 2-descriptors, or 1-descriptor, QSPR should fall within the one standard error, they must be chosen instead, accordingly the smallest falling within the one standard error). So, in this example, the 3-descriptors QSPR from the step-up population index 2 of Table 2 (“table of candidate QSPRs”), is deemed as the one with the smallest chance of being overfitted. In case the final candidate is not deemed appropriate for any reason, the procedure restart from Figure 3, choosing the second smallest average MAE population index.

### Method S3. Estimation of the probability of coincidental relationship among the descriptors and the endpoint.

From the randomization techniques proposed by Rücker et al.<sup>2</sup>, the one called mode 1, which randomizes the descriptors while keeping the endpoint untouched, was considered the most appropriate in this work. Since this technique does not consider the nature of the descriptors, it could be prone to be more permissive than it should, since randomness is unbounded (for example, using whatever value for a fingerprint, which cannot assume, by definition, different values from 0 or 1, raised questions to us). For this reason, random values were bounded to the range of each descriptor, using integer numbers for fingerprints/counters, and real numbers for the remaining. This randomization technique has been used alongside mode 1 to help evaluating the probability of coincidental relationships.

---

<sup>2</sup> Rücker et al.  $\gamma$ -Randomization and Its Variants in QSPR/QSAR, 2007, J. Chem. Inf. Model, 47, 2345-2357

## Appendix

### A1. Descriptors filtering

R version: 4.1.2

R caret package version: 6.0.90

#### Algorithm

- 1) Select one dataset e.g., Ta (all datasets can be found in supplemental\_datasets.xlsx).
- 2) Exclude descriptors having more than 80 percent same value.
- 3) Exclude the remaining descriptors by correlation, using the *findCorrelation* function of the *caret* package. Set  $x$  as the correlation matrix of the filtered descriptors from point 2 and *cutoff* as 0.95.
- 4) Exclude the remaining descriptors spanning more than 2 orders of magnitude.

### A2. Descriptors selection

R version: 4.1.2

#### Setup

Step-up maximum number of descriptors:  $T_a = 4$ ,  $T_{a^*} = 4$ ,  $T_{a+N_t} = 6$ ,  $T_{a^*+N_t} = 6$ ,  $P_e+P_g = 3$ .

Step-up population size:  $T_a = 25$ ,  $T_{a^*} = 25$ ,  $T_{a+N_t} = 25$ ,  $T_{a^*+N_t} = 25$ ,  $P_e+P_g = 19$ .

#### Algorithm

- 1) Filter a training dataset as explained in **A1. Descriptors filtering**.
- 2) Set the step-up maximum number of descriptors and the population size for a dataset according to the **Setup** specifications.
- 3) Run the step-up procedure using *lm* for regression over the filtered dataset and  $R^2$  as the cost function.



### A3. Randomization

R version: 4.1.2

#### Algorithm

- 1) Filter a training dataset as explained in **A1. Descriptors filtering**. Let denote the filtered training set as ORIG\_DATA.
- 2) Let denote STORED\_R2 the vector that will contain the highest  $R^2$  values found after each randomization round. These values will be used for the calculation of probability of coincidental relationships.
- 3) Let denote s RAND\_DATA a matrix, that will contain the random descriptors and the endpoint of ORIG\_DATA.
- 4) Set the random seed to 1 using the *set.seed* function.
- 5) For  $i = 1, 2, \dots$ , total randomization rounds (set to 100).
  - a) If randomization is range-based fill the descriptors of RAND\_DATA using **Randomization 1**, otherwise fill the descriptors of RAND\_DATA using **Randomization 2** (keep the nature of the descriptors).
  - b) Run the step-up procedure using *lm* for regression over RAND\_DATA, and  $R^2$  as the cost function.
  - c) Store the highest  $R^2$  value to the  $i^{\text{th}}$  index of STORED\_R2.

#### Randomization 1

- 1) For  $i = 1, 2, \dots$ , number of ORIG\_DATA descriptors.
  - a) Generate a vector of random numbers using the *runif* function, set  $n$  as the number of chemicals, *min* as -1 and *max* as 1.
  - b) Copy the randomized vector of step a to the  $i^{\text{th}}$  descriptor of RAND\_DATA.

#### Randomization 2

- 1) For  $i = 1, 2, \dots$ , number of ORIG\_DATA descriptors.
  - a) Generate a vector of random numbers using the *runif* function, set  $n$  as the number of chemicals, *min* and *max* respectively as the minimum and the maximum value of the descriptor of ORIG\_DATA.

- b) Detect whether the  $i^{\text{th}}$  descriptor from ORIG\_DATA is filled with integers by using the *all.equal* function by setting *target* as the  $i^{\text{th}}$  descriptor, *current* as *as.integer(i<sup>th</sup> descriptor)* and *check.attributes* as *FALSE*.
- c) If all values of the  $i^{\text{th}}$  descriptor are integers, round the values of the randomized vector using the *round* function, then copy the rounded randomized vector to the  $i^{\text{th}}$  descriptor of RAND\_DATA, otherwise (since not all values are integers) copy the randomized vector as it is to the  $i^{\text{th}}$  descriptor of RAND\_DATA.

#### A4. Leave-one-out bootstrap

R version: 4.1.2

R caret package version: 6.0.90

#### Setup

Step-up maximum number of descriptors:  $T_a = 4$ ,  $T_{a^*} = 4$ ,  $T_{a+N_t} = 6$ ,  $T_{a^*+N_t} = 6$ ,  $P_e+P_g = 3$ .

Step-up population size:  $T_a = 25$ ,  $T_{a^*} = 25$ ,  $T_{a+N_t} = 25$ ,  $T_{a^*} + N_t = 25$ ,  $P_e+P_g = 19$ .

#### Algorithm

- 1) Filter a training dataset as explained in **A1. Descriptors filtering**. Let denote the filtered training set as ORIG\_DATA.
- 2) Let denote IS\_TEST\_IDX a boolean vector containing the chemicals that has been at least once in the test set of any of the bootstrapped datasets.
- 3) Let denote BOOT\_TRAIN\_IDX a vector containing the bootstrap training set indexes.
- 4) Let denote BOOT\_TRAIN the bootstrap training set matrix filled by selecting rows (chemicals) from ORIG\_DATA, according to BOOT\_TRAIN\_IDX.
- 5) Let denote BOOT\_TEST\_IDX the bootstrap test set indexes.
- 6) Let denote BOOT\_TEST the bootstrap test set matrix filled by selecting rows (chemicals) from ORIG\_DATA, according to BOOT\_TEST\_IDX.
- 7) Let denote SUM\_ABS\_RES a matrix of step-up population size x step-up maximum number of descriptors, that will contain the sum of the absolute value of the residuals, calculated by applying the bootstrapped step-up models to BOOT\_TEST.

- 8) Let denote `BOOT_ROUNDS = 25` the number of bootstrap rounds.
- 9) Let denote `BOOT_MAE` a group of `BOOT_ROUNDS` matrices of step-up population size  $\times$  step-up maximum number of descriptors. The matrices elements will contain the MAE values calculated by the bootstrap procedure.
- 10) For  $i = 1, 2, \dots, \text{BOOT\_ROUNDS}$ .
  - a) Set the random seed to  $i$  using the `set.seed` function.
  - b) Set all elements of `SUM_ABS_RES` matrix to 0.
  - c) For  $j = 1, 2, \dots$ , total bootstrap repeats (set to 5).
    - i) Set all elements of `IS_TEST_IDX` to `FALSE`.
    - ii) Fill `BOOT_TRAIN_IDX` using the `createResample` function of the `caret` package, by setting `y` as a vector containing values from 1 to the number of training chemicals, `times = 1` and `list = FALSE`.
    - iii) Fill `BOOT_TRAIN` according to `BOOT_TRAIN_IDX`.
    - iv) Fill `BOOT_TEST_IDX` by the training set indexes not included in `BOOT_TRAIN_IDX`.
    - v) Fill `BOOT_TEST` according to `BOOT_TEST_IDX`.
    - vi) Run the step-up procedure using `lm` for regression over `BOOT_TRAIN` and  $R^2$  as the cost function.
    - vii) Apply `BOOT_TEST` to each `lm` model of the step-up population.
    - viii) Add absolute residuals values, calculated from vii, to `SUM_ABS_RES`.
    - ix) By keeping all previous values, flag `IS_TEST_IDX` elements as `TRUE` according to `BOOT_TEST_IDX`.
    - x) If any of `IS_TEST_IDX` elements is `FALSE` go to step ii.
    - xi) Calculate the MAE values from `SUM_ABS_RES` and fill the  $i^{\text{th}}$  `BOOT_MAE` matrix accordingly.

## Tables

Table S1. Canonical SMILES.

| ID | Name                        | SMILES                                                                                                        |
|----|-----------------------------|---------------------------------------------------------------------------------------------------------------|
| 2  | Tramadol                    | <chem>COc1cccc(c1)C1(O)CCCC1CN(C)C</chem>                                                                     |
| 4  | Oxazepam                    | <chem>O=C1Nc2ccc(cc2C(=NC1O)c1cccc1)Cl</chem>                                                                 |
| 6  | Carbamazepine-10,11-epoxide | <chem>NC(=O)N1c2cccc2C2C(c3c1cccc3)O2</chem>                                                                  |
| 7  | 4-hydroxy-1H-benzotriazole  | <chem>Oc1cccc2c1[nH]nn2</chem>                                                                                |
| 8  | Sotalol                     | <chem>CC(NCC(c1ccc(cc1)NS(=O)(=O)C)O)C</chem>                                                                 |
| 9  | Propranolol                 | <chem>OC(COc1cccc2c1cccc2)CNC(C)C</chem>                                                                      |
| 10 | Hydrochlorothiazide         | <chem>Clc1cc2NCNS(=O)(=O)c2cc1S(=O)(=O)N</chem>                                                               |
| 11 | Fluconazole                 | <chem>Fc1ccc(c(c1)F)C(Cn1cncn1)(Cn1cncn1)O</chem>                                                             |
| 12 | Venlafaxine                 | <chem>COc1ccc(cc1)C(C1(O)CCCC1)CN(C)C</chem>                                                                  |
| 13 | Metoprolol                  | <chem>COCCc1ccc(cc1)OCC(CNC(C)C)O</chem>                                                                      |
| 14 | Gabapentin                  | <chem>NCC1(CCCCC1)CC(=O)O</chem>                                                                              |
| 15 | Furosemide                  | <chem>OC(=O)c1cc(c(cc1NCc1cccc1)Cl)S(=O)(=O)N</chem>                                                          |
| 16 | Diclofenac                  | <chem>OC(=O)Cc1cccc1Nc1c(Cl)cccc1Cl</chem>                                                                    |
| 18 | Atenolol                    | <chem>OC(COc1ccc(cc1)CC(=O)N)CNC(C)C</chem>                                                                   |
| 20 | Valsartan                   | <chem>CCCCC(=O)N(C(C(=O)O)C(C)C)Cc1ccc(cc1)c1cccc1c1n[nH]nn1</chem>                                           |
| 21 | Ketoprofen                  | <chem>OC(=O)C(c1cccc(c1)C(=O)c1cccc1)C</chem>                                                                 |
| 22 | Metoprolol acid             | <chem>OC(COc1ccc(cc1)CC(=O)O)CNC(C)C</chem>                                                                   |
| 24 | Sulfamethoxazole            | <chem>Nc1ccc(cc1)S(=O)(=O)Nc1noc(c1)C</chem>                                                                  |
| 25 | Aniline                     | <chem>Nc1ccccc1</chem>                                                                                        |
| 27 | Acesulfame                  | <chem>O=C1C=C(C)OS(=O)(=O)N1</chem>                                                                           |
| 29 | Acetaminophen               | <chem>CC(=O)Nc1ccc(cc1)O</chem>                                                                               |
| 30 | Caffeine                    | <chem>Cn1cnc2c1c(=O)n(C)c(=O)n2C</chem>                                                                       |
| 31 | (-)-Erythromycin            | <chem>CCC1OC(=O)C(C)C(OC2OC(C)C(C(C2)(C)OC)O)C(C)C(OC2OC(C)CC(C2O)N(C)C)C(CC(C(=O)C(C(C1(C)O)O)C)C)C)O</chem> |
| 32 | (±)-Abscisic acid           | <chem>OC(=O)C=C(C=CC1(O)C(=CC(=O)CC1(C)C)C)C</chem>                                                           |

Table S1. Canonical SMILES.

|    |                                                              |                                               |
|----|--------------------------------------------------------------|-----------------------------------------------|
| 33 | (S)-Nicotine                                                 | CN1CCCC1c1cccnc1                              |
| 34 | 1-(2-Morpholinophenyl)dihydro-1H-pyrrole-2,5-dione           | O=C1CCC(=O)N1c1cccc1N1CCOCC1                  |
| 35 | 1-Aminocyclohexanecarboxylic acid                            | OC(=O)C1(N)CCCCC1                             |
| 36 | 1-Methyluric acid                                            | O=c1[nH]c2c([nH]1)c(=O)n(c(=O)[nH]2)C         |
| 37 | 1,2-Benzisothiazolin-3-one                                   | O=c1[nH]sc2c1cccc2                            |
| 38 | 1,7-Dimethyluric acid                                        | Cn1c(=O)[nH]c2c1c(=O)n(c(=O)[nH]2)C           |
| 39 | 10-Hydroxycarbazepine                                        | OC1Cc2ccccc2N(c2c1cccc2)C(=O)N                |
| 40 | 15-Deoxy-Δ <sup>12,14</sup> -prostaglandin A1                | CCCCC=CC=C1C=CC(=O)C1CCCCCCC(=O)O             |
| 41 | 16α-Hydroxyestrone                                           | Oc1ccc2c(c1)CCC1C2CCC2(C1CC(C2=O)O)C          |
| 42 | 17α-Hydroxyprogesterone                                      | O=C1CCC2(C(=C1)CCC1C2CCC2(C1CCC2(O)C(=O)C)C)C |
| 43 | 2-[(Dimethylamino)methylidene]indan-1-one                    | CN(C=C1Cc2c(C1=O)cccc2)C                      |
| 44 | 2-[4-(3-Amino-2-hydroxypropoxy)phenyl]acetamide              | NCC(COc1ccc(cc1)CC(=O)N)O                     |
| 45 | 2-Methoxy-5-methylaniline                                    | COc1ccc(cc1N)C                                |
| 46 | 2-Phenylbenzimidazole-5-sulfonic acid                        | OS(=O)(=O)c1ccc2c(c1)[nH]c(n2)c1cccc1         |
| 47 | 2,2,6,6-Tetramethyl-1-piperidinol (TEMPO)                    | [O]N1C(C)(C)CCCC1(C)C                         |
| 48 | 2,2,6,6-Tetramethyl-4-piperidinol                            | OC1CC(C)(C)NC(C1)(C)C                         |
| 49 | 2,3,5,6-Tetramethylpyrazine                                  | Cc1nc(C)c(nc1C)C                              |
| 50 | 2,4-Diaminotoluene                                           | Nc1ccc(c(c1)N)C                               |
| 51 | 3-Aminosalicylic acid                                        | OC(=O)c1cccc(c1O)N                            |
| 52 | 3-Hydroxy-2-methylpyridine                                   | Oc1cccnc1C                                    |
| 53 | 3,4-Dimethoxycinnamic acid                                   | COc1cc(C=CC(=O)O)ccc1OC                       |
| 54 | 3,5-di-tert-Butyl-4-hydroxybenzoic acid                      | OC(=O)c1cc(c(c(c1)C(C)(C)O)C(C)(C)C           |
| 55 | 3,5-Dimethyl-1-phenylpyrazole                                | Cc1nn(c(c1)C)c1cccc1                          |
| 56 | 4-Acetamidobenzaldehyde                                      | O=Cc1ccc(cc1)NC(=O)C                          |
| 57 | 4-Amino-3-hydroxybenzoic acid                                | OC(=O)c1ccc(c(c1)O)N                          |
| 58 | 4-Aminophenol                                                | Nc1ccc(cc1)O                                  |
| 59 | 4-Hydroxycoumarin                                            | O=c1cc(O)c2c(o1)cccc2                         |
| 60 | 4-Methyl-5-thiazoleethanol                                   | Cc1ncsc1CCO                                   |
| 61 | 4-tert-Butylcyclohexyl acetate                               | CC(=O)OC1CCC(CC1)C(C)(C)C                     |
| 62 | 6-(3,4,5-Trimethoxystyryl)-2,3,4,5-tetrahydropyridazin-3-one | COc1cc(C=CC2=NNC(=O)CC2)cc(c1OC)OC            |

Table S1. Canonical SMILES.

|    |                                              |                                                                                                                |
|----|----------------------------------------------|----------------------------------------------------------------------------------------------------------------|
| 63 | 6-Aminocaproic acid                          | <chem>NCCCCC(=O)O</chem>                                                                                       |
| 64 | 6-Methyl[1,2,4]triazolo[4,3-b]pyridazin-8-ol | <chem>Cc1cc(=O)c2n([nH]1)cnn2</chem>                                                                           |
| 65 | 6,7-Dihydroxy-4-methylcoumarin               | <chem>O=c1cc(C)c2c(o1)cc(c(c2)O)O</chem>                                                                       |
| 66 | 7-Methylguanine                              | <chem>Nc1nc(=O)c2c([nH]1)ncn2C</chem>                                                                          |
| 67 | 7-Methylxanthine                             | <chem>O=c1[nH]c(=O)c2c([nH]1)ncn2C</chem>                                                                      |
| 68 | 7 $\alpha$ -Hydroxytestosterone              | <chem>O=C1CCC2(C(=C1)CC(C1C2CCC2(C1CCC2O)C)O)C</chem>                                                          |
| 69 | Acetanilide                                  | <chem>CC(=O)Nc1ccccc1</chem>                                                                                   |
| 70 | Acetylcholine                                | <chem>CC(=O)OCC[N+](C)(C)C</chem>                                                                              |
| 71 | Acridine                                     | <chem>c1ccc2c(c1)nc1c(c2)cccc1</chem>                                                                          |
| 72 | Acycloguanosine                              | <chem>Nc1nc(=O)c2c([nH]1)n(COCCO)cn2</chem>                                                                    |
| 73 | Androstenedione                              | <chem>O=C1CCC2(C(=C1)CCC1C2CCC2(C1CCC2=O)C)C</chem>                                                            |
| 75 | Azobenzene                                   | <chem>c1ccc(cc1)N=Nc1ccccc1</chem>                                                                             |
| 76 | Benzophenone                                 | <chem>O=C(c1ccccc1)c1ccccc1</chem>                                                                             |
| 77 | Benzoylcgonine                               | <chem>CN1C2CCC1C(C(C2)OC(=O)c1ccccc1)C(=O)O</chem>                                                             |
| 78 | Bis(2-butoxyethyl) ether                     | <chem>CCCCOCCOCCOCCOCCO</chem>                                                                                 |
| 79 | Bis(2-ethylhexyl) amine                      | <chem>CCCC(CNCC(CCCC)CC)CC</chem>                                                                              |
| 80 | Cafestol                                     | <chem>OCC1(O)CC23CC1CCC3C1(C(CC2)c2ccoc2CC1)C</chem>                                                           |
| 81 | Caprolactam                                  | <chem>O=C1CCCCCN1</chem>                                                                                       |
| 82 | Carbendazim                                  | <chem>COC(=O)Nc1nc2c([nH]1)cccc2</chem>                                                                        |
| 83 | Citroflex 2                                  | <chem>CCOC(=O)C(CC(=O)OCC)(CC(=O)OCC)O</chem>                                                                  |
| 84 | Citroflex 4                                  | <chem>CCCCOC(=O)C(CC(=O)OCCCC)(CC(=O)OCCCC)O</chem>                                                            |
| 85 | Clarithromycin                               | <chem>CCC1OC(=O)C(C)C(OC2CC(C)(OC)C(C(O2)C)O)C(C)C(OC2OC(C)CC(C2O)N(C)C)C(CC(C(=O)C(C(C1(C)O)O)C)C)C)OC</chem> |
| 86 | Climbazole                                   | <chem>Clc1ccc(cc1)OC(C(=O)C(C)C)n1cncc1</chem>                                                                 |
| 87 | Codeine                                      | <chem>COc1ccc2c3c1OC1C43CCN(C(C2)C4C=CC1O)C</chem>                                                             |
| 88 | Cotinine                                     | <chem>O=C1CCC(N1C)c1ccnc1</chem>                                                                               |
| 89 | D-Sphingosine                                | <chem>CCCCCCCCCCCC=CC(C(CO)N)O</chem>                                                                          |
| 90 | Decanamide                                   | <chem>CCCCCCCCC(=O)N</chem>                                                                                    |
| 91 | DEET                                         | <chem>CCN(C(=O)c1cccc(c1)C)CC</chem>                                                                           |
| 92 | Dehydroepiandrosterone (DHEA)                | <chem>OC1CCC2(C(=CCC3C2CCC2(C3CCC2=O)C)C1)C</chem>                                                             |
| 93 | Dibenzylamine                                | <chem>N(Cc1ccccc1)Cc1ccccc1</chem>                                                                             |

Table S1. Canonical SMILES.

|     |                                 |                                                  |
|-----|---------------------------------|--------------------------------------------------|
| 94  | Dibutyl phosphate               | CCCCOP(=O)(OCCCC)O                               |
| 95  | Diethyl phosphate               | CCOP(=O)(OCC)O                                   |
| 96  | Diethyl phthalate               | CCOC(=O)c1ccccc1C(=O)OCC                         |
| 97  | Diglyme                         | COCCOCCOC                                        |
| 98  | Diketo-Metribuzin               | CC(c1n[nH]c(=O)n(c1=O)N)(C)C                     |
| 99  | DL-Carnitine                    | OC(C[N+](C)(C)C)CC(=O)[O-]                       |
| 100 | Ecgonine                        | OC1CC2CCC(C1C(=O)O)N2C                           |
| 101 | Ethyl paraben                   | CCOC(=O)c1ccc(cc1)O                              |
| 102 | Ferulic acid                    | COc1cc(C=CC(=O)O)ccc1O                           |
| 103 | Galaxolidone                    | O=C1OCC(c2c1cc1c(c2)C(C(C1(C)C)C)(C)C)C          |
| 104 | Guaifenesin                     | OCC(COc1ccccc1OC)O                               |
| 105 | Guanine                         | Nc1nc(=O)c2c([nH]1)nc[nH]2                       |
| 106 | Histamine                       | NCCc1cnc[nH]1                                    |
| 107 | Ibuprofen                       | CC(Cc1ccc(cc1)C(C(=O)O)C)C                       |
| 108 | Icaridin                        | OCCC1CCCN1C(=O)OC(CC)C                           |
| 109 | Indole-3-butyric acid           | OC(=O)CCCc1c[nH]c2c1cccc2                        |
| 110 | Indole-3-pyruvic acid           | OC(=O)C(=O)Cc1c[nH]c2c1cccc2                     |
| 111 | Isoprenaline                    | CC(NCC(c1ccc(c(c1)O)O)O)C                        |
| 112 | Isotretinoin                    | CC(=CC=CC(=CC(=O)O)C)C=CC1=C(C)CCCC1(C)C         |
| 113 | Kahweol                         | OCC1(O)CC23CC1CCC3C1(C(CC2)c2ccoc2C=C1)C         |
| 114 | L-threo-3-Phenylserine          | OC(C(C(=O)O)N)c1ccccc1                           |
| 115 | Losartan                        | CCCCc1nc(c(n1Cc1ccc(cc1)c1ccccc1c1n[nH]nn1)CO)Cl |
| 116 | Mephedrone                      | CNC(C(=O)c1ccc(cc1)C)C                           |
| 117 | Metamfepramone                  | CC(C(=O)c1ccccc1)N(C)C                           |
| 118 | Methyl indole-3-acetate         | COC(=O)Cc1c[nH]c2c1cccc2                         |
| 119 | Morphine                        | OC1C=CC2C34C1Oc1c4c(CC2N(CC3)C)ccc1O             |
| 120 | N-(2,4-Dimethylphenyl)formamide | O=CNc1ccc(cc1)C                                  |
| 121 | N,N-Dimethylaniline             | CN(c1ccccc1)C                                    |
| 122 | Nootkatone                      | O=C1CC(C)C2(C(=C1)CCC(C2)C(=C)C)C                |
| 123 | Norfenefrine                    | NCC(c1cccc(c1)O)O                                |
| 124 | Oxybenzone                      | COc1ccc(c(c1)O)C(=O)c1ccccc1                     |

Table S1. Canonical SMILES.

|     |                          |                                                       |
|-----|--------------------------|-------------------------------------------------------|
| 126 | PEG n5                   | OCCOCCOCCOCCOCCO                                      |
| 127 | PEG n6                   | OCCOCCOCCOCCOCCOCCO                                   |
| 128 | PEG n7                   | OCCOCCOCCOCCOCCOCCOCCO                                |
| 129 | PEG n8                   | OCCOCCOCCOCCOCCOCCOCCOCCO                             |
| 130 | Perillartine             | ON=CC1=CCC(CC1)C(=C)C                                 |
| 131 | Phenacetin               | CCOc1ccc(cc1)NC(=O)C                                  |
| 132 | Pilocarpine              | CCC1C(=O)OCC1Cc1cncn1C                                |
| 133 | Polygodial               | O=CC1C(=CCC2C1(C)CCCC2(C)C)C=O                        |
| 134 | PPG n4                   | OCC(OCC(OCC(OCC(O)C)C)C)C                             |
| 135 | PPG n5                   | OCC(OCC(OCC(OCC(OCC(O)C)C)C)C)C                       |
| 136 | PPG n6                   | OCC(OCC(OCC(OCC(OCC(OCC(O)C)C)C)C)C)C                 |
| 137 | PPG n7                   | OCC(OCC(OCC(OCC(OCC(OCC(OCC(O)C)C)C)C)C)C)C           |
| 138 | PPG n8                   | OCC(OCC(OCC(OCC(OCC(OCC(OCC(OCC(O)C)C)C)C)C)C)C)C     |
| 139 | Pregabalin               | NCC(CC(=O)O)CC(C)C                                    |
| 140 | PV9                      | CCCCCCC(C(=O)c1ccccc1)N1CCCC1                         |
| 141 | Pyridostigmine           | C[n+]1cccc(c1)OC(=O)N(C)C                             |
| 142 | Pyroquilon               | O=C1CCc2c3N1CCc3ccc2                                  |
| 143 | Rhodamine 6G             | CCOC(=O)c1ccccc1c1c2cc(C)c(=NCC)cc2oc2c1cc(C)c(c2)NCC |
| 144 | Ricine                   | N#Cc1c(OC)ccn(c1=O)C                                  |
| 145 | Serotonin                | NCCc1c[nH]c2c1cc(O)cc2                                |
| 146 | Sulfapyridine            | Nc1ccc(cc1)S(=O)(=O)Nc1cccn1                          |
| 147 | Theobromine              | Cn1cnc2c1c(=O)[nH]c(=O)n2C                            |
| 148 | Tranexamic acid          | NCC1CCC(CC1)C(=O)O                                    |
| 149 | Triethyl phosphate       | CCOP(=O)(OCC)OCC                                      |
| 150 | Triisopropanolamine      | CC(CN(CC(O)C)CC(O)C)O                                 |
| 151 | Trilostane               | N#CC1=C(O)C2C3(C(C1)(C)C1CCC4(C(C1CC3)CCC4O)C)O2      |
| 152 | Trimethoprim             | COc1cc(Cc2cnc(nc2N)N)cc(c1OC)OC                       |
| 153 | Tropinone                | CN1C2CCC1CC(=O)C2                                     |
| 154 | Venlafaxine N-Oxide      | COc1ccc(cc1)C(C1(O)CCCCC1)CN(=O)(C)C                  |
| 155 | (+/-)-12(13)-DiHOME      | CCCCC(C(CC=CCCCCCCC(=O)O)O)O                          |
| 156 | 2,4-Dimethylbenzaldehyde | O=Cc1ccc(cc1C)C                                       |

Table S1. Canonical SMILES.





|     |                                                                          |                                                    |
|-----|--------------------------------------------------------------------------|----------------------------------------------------|
| 190 | 2-Amino-6-methylmercaptapurine                                           | CSc1nc(N)nc2c1[nH]cn2                              |
| 191 | 2-Deoxyribose 5-phosphate                                                | OC1CC(C(O1)COP(=O)(O)O)O                           |
| 192 | 2-Hydroxycinnamic acid                                                   | OC(=O)C=Cc1ccccc1O                                 |
| 193 | 2-Hydroxyhippuric acid                                                   | OC(=O)CNC(=O)c1ccccc1O                             |
| 194 | 2-Naphthalenesulfonic acid                                               | OS(=O)(=O)c1ccc2c(c1)cccc2                         |
| 195 | 2,5-di-tert-Butylhydroquinone                                            | CC(c1cc(O)c(cc1O)C(C)(C)C)(C)C                     |
| 196 | 3-(4-Hydroxyphenyl)propionic acid                                        | OC(=O)CCc1ccc(cc1)O                                |
| 197 | 3-Anisic acid                                                            | COc1ccc(c1)C(=O)O                                  |
| 198 | 3-Hydroxydecanoic acid                                                   | CCCCCCC(CC(=O)O)O                                  |
| 199 | 3-Phenoxybenzoic acid                                                    | OC(=O)c1ccc(c1)Oc1ccccc1                           |
| 200 | 3-Phenyllactic acid                                                      | OC(C(=O)O)Cc1ccccc1                                |
| 201 | 3-tert-Butyladipic acid                                                  | OC(=O)CCC(C(C)(C)C)CC(=O)O                         |
| 202 | 3,3'-Dinitro(1,1'-biphenyl)-4,4'-diamine                                 | O=N(=O)c1cc(ccc1N)c1ccc(c(c1)N(=O)=O)N             |
| 203 | 3,4-Dihydroxybenzenesulfonic acid                                        | Oc1ccc(cc1O)S(=O)(=O)O                             |
| 204 | 3,7-Dimethyluric acid                                                    | O=c1[nH]c(=O)c2c(n1C)[nH]c(=O)n2C                  |
| 205 | 4-Acetamidobenzoic acid                                                  | CC(=O)Nc1ccc(cc1)C(=O)O                            |
| 206 | 4-Hydroxy-3-methoxyphenylglycol sulfate                                  | OCC(c1ccc(c(c1)OC)OS(=O)(=O)O)O                    |
| 207 | 4-Hydroxyphenylpyruvic acid                                              | Oc1ccc(cc1)CC(=O)C(=O)O                            |
| 208 | 4-Oxo-6-(3-pyridyl)-2-thioxo-1,2,3,4-tetrahydropyrimidine-5-carbonitrile | N#Cc1c(=O)[nH]c(=S)[nH]c1c1cccnc1                  |
| 209 | 4-Pyridoxic acid                                                         | OCc1cnc(c(c1C(=O)O)O)C                             |
| 210 | 5-Hydroxyindole-3-acetic acid                                            | OC(=O)Cc1c[nH]c2c1cc(O)cc2                         |
| 211 | 5,7-Dihydroxy-4-methylcoumarin                                           | Oc1cc(O)c2c(c1)oc(=O)cc2C                          |
| 212 | 6-Methoxysalicylic acid                                                  | COc1ccc(c1C(=O)O)O                                 |
| 214 | 8-(4-Sulfophenyl) octanoic acid                                          | OC(=O)CCCCCcc1ccc(cc1)S(=O)(=O)O                   |
| 215 | 8-Iso-15-keto-prostaglandin-F2β                                          | CCCCC(=O)C=CC1C(O)CC(C1CC=CCCC(=O)O)O              |
| 216 | 9-Methyluric acid                                                        | O=c1[nH]c(=O)c2c([nH]1)n(C)c(=O)[nH]2              |
| 218 | Azelaic acid                                                             | OC(=O)CCCCCCCC(=O)O                                |
| 219 | Biotin                                                                   | OC(=O)CCCCC1SCC2C1NC(=O)N2                         |
| 220 | Capryloylglycine                                                         | CCCCCCCC(=O)NCC(=O)O                               |
| 221 | Cholic acid                                                              | OC1CCC2(C(C1)CC(C1C2CC(O)C2(C1CCC2C(CCC(=O)O)C)O)C |
| 222 | Cyclamic acid                                                            | OS(=O)(=O)NC1CCCCC1                                |

Table S1. Canonical SMILES.

|     |                                                                                      |                                                                             |
|-----|--------------------------------------------------------------------------------------|-----------------------------------------------------------------------------|
| 223 | DL-Mandelic acid                                                                     | <chem>OC(c1ccccc1)C(=O)O</chem>                                             |
| 224 | Dodecanedioic acid                                                                   | <chem>OC(=O)CCCCCCCCC(=O)O</chem>                                           |
| 225 | Dodecyl sulfate                                                                      | <chem>CCCCCCCCCCCCOS(=O)(=O)O</chem>                                        |
| 226 | Equol                                                                                | <chem>Oc1ccc(cc1)C1COc2c(C1)ccc(c2)O</chem>                                 |
| 227 | Epinephrine                                                                          | <chem>CNCC(c1ccc(c1)O)O</chem>                                              |
| 229 | Fexofenadine                                                                         | <chem>OC(=O)C(c1ccc(cc1)C(CCCN1CCC(CC1)C(c1ccccc1)(c1ccccc1)O)O)(C)C</chem> |
| 230 | Hippuric acid                                                                        | <chem>O=C(c1ccccc1)NCC(=O)O</chem>                                          |
| 232 | Mesalamine                                                                           | <chem>Nc1ccc(c1)C(=O)O</chem>                                               |
| 233 | Mono(2-ethylhexyl) phthalate (MEHP)                                                  | <chem>CCCC(COC(=O)c1ccccc1C(=O)O)CC</chem>                                  |
| 234 | Monobutyl phthalate                                                                  | <chem>CCCCOC(=O)c1ccccc1C(=O)O</chem>                                       |
| 235 | Myristyl sulfate                                                                     | <chem>CCCCCCCCCCCCCOS(=O)(=O)O</chem>                                       |
| 236 | N-(2-Morpholinoethyl)-4-(1H-pyrazol-1-yl)benzamide                                   | <chem>O=C(c1ccc(cc1)n1cccn1)NCCN1CCOCC1</chem>                              |
| 237 | N-(4,6-Dimethyl-2-pyrimidinyl)-4-[(E)-(2-hydroxybenzylidene)amino]benzenesulfonamide | <chem>Cc1cc(C)nc(n1)NS(=O)(=O)c1ccc(cc1)N=Cc1ccccc1O</chem>                 |
| 238 | N-Acetyl-4-aminosalicylic acid                                                       | <chem>CC(=O)Nc1ccc(c1)C(=O)O</chem>                                         |
| 239 | N-Acetyl-DL-tryptophan                                                               | <chem>CC(=O)NC(C(=O)O)Cc1c[nH]c2c1cccc2</chem>                              |
| 240 | N-Acetyl-L-phenylalanine                                                             | <chem>OC(=O)C(Cc1ccccc1)NC(=O)C</chem>                                      |
| 241 | N-Acetyl-L-tyrosine                                                                  | <chem>OC(=O)C(Cc1ccc(cc1)O)NC(=O)C</chem>                                   |
| 242 | N2-[2-(2-Pyridyl)ethyl]-4-hydroxyquinazoline-2-carboxamide                           | <chem>O=C(c1nc(=O)c2c([nH]1)ccc2)NCCc1ccccn1</chem>                         |
| 245 | Porphobilinogen                                                                      | <chem>NCc1[nH]cc(c1CC(=O)O)CCC(=O)O</chem>                                  |
| 246 | Propylparaben                                                                        | <chem>CCCOC(=O)c1ccc(cc1)O</chem>                                           |
| 247 | Saccharin                                                                            | <chem>O=C1NS(=O)(=O)c2c1cccc2</chem>                                        |
| 248 | Tetradecanedioic acid                                                                | <chem>OC(=O)CCCCCCCCCCCC(=O)O</chem>                                        |
| 249 | Theophylline                                                                         | <chem>Cn1c(=O)n(C)c2c(c1=O)[nH]cn2</chem>                                   |
| 250 | Xylenesulfonate                                                                      | <chem>Cc1ccc(cc1C)S(=O)(=O)O</chem>                                         |
| 251 | β-D-Glucopyranuronic acid                                                            | <chem>OC1OC(C(=O)O)C(C(C1O)O)O</chem>                                       |
| 252 | 16-Hydroxyhexadecanoic acid                                                          | <chem>OCCCCCCCCCCCCC(=O)O</chem>                                            |
| 253 | 2'-Deoxyuridine                                                                      | <chem>OCC1OC(CC1O)n1ccc(=O)[nH]c1=O</chem>                                  |
| 254 | 2'-O-Methylguanosine                                                                 | <chem>COC1C(O)C(OC1n1cnc2c1[nH]c(N)nc2=O)CO</chem>                          |
| 255 | 3-Indoxyl sulphate                                                                   | <chem>OS(=O)(=O)Oc1c[nH]c2c1cccc2</chem>                                    |
| 256 | 3-Methylxanthine                                                                     | <chem>O=c1[nH]c(=O)c2c(n1C)nc[nH]2</chem>                                   |

Table S1. Canonical SMILES.

|     |                           |                                                                       |
|-----|---------------------------|-----------------------------------------------------------------------|
| 257 | 4-Acetamidobutanoic acid  | <chem>OC(=O)CCCNC(=O)C</chem>                                         |
| 258 | 4'-Hydroxydiclofenac      | <chem>OC(=O)Cc1cccc1Nc1c(Cl)cc(cc1Cl)O</chem>                         |
| 260 | D-(-)-Quinic acid         | <chem>OC1C(O)CC(CC1O)(O)C(=O)O</chem>                                 |
| 261 | Desthiobiotin             | <chem>OC(=O)CCCCC1NC(=O)NC1C</chem>                                   |
| 262 | Glycoursodeoxycholic acid | <chem>OC1CCC2(C(C1)CC(C1C2CCC2(C1CCC2C(CCC(=O)NCC(=O)O)C)C)O)C</chem> |
| 263 | Glycyl-L-leucine          | <chem>NCC(=O)NC(C(=O)O)CC(C)C</chem>                                  |
| 264 | Guanosine                 | <chem>OCC1OC(C(C1O)O)n1cnc2c1[nH]c(N)nc2=O</chem>                     |
| 265 | Hypoxanthine              | <chem>O=c1[nH]cnc2c1[nH]cn2</chem>                                    |
| 266 | Indole-3-lactic acid      | <chem>OC(=O)C(Cc1c[nH]c2c1cccc2)O</chem>                              |
| 267 | L-Tyrosine                | <chem>OC(=O)C(Cc1ccc(cc1)O)N</chem>                                   |
| 268 | Leucylproline             | <chem>CC(CC(C(=O)N1CCCC1C(=O)O)N)C</chem>                             |
| 269 | Methylmalonic acid        | <chem>CC(C(=O)O)C(=O)O</chem>                                         |
| 271 | N-Acetylanthranilic acid  | <chem>CC(=O)Nc1cccc1C(=O)O</chem>                                     |
| 272 | Pantothenic acid          | <chem>OCC(C(C(=O)NCCC(=O)O)O)(C)C</chem>                              |
| 273 | Probenecid                | <chem>CCCN(S(=O)(=O)c1ccc(cc1)C(=O)O)CCC</chem>                       |
| 274 | Thymidine                 | <chem>OCC1OC(CC1O)n1cc(C)c(=O)[nH]c1=O</chem>                         |
| 275 | Uric acid                 | <chem>O=c1[nH]c2c([nH]1)c(=O)n(c(=O)n2C)C</chem>                      |
| 276 | Uridine                   | <chem>OCC1OC(C(C1O)O)n1ccc(=O)[nH]c1=O</chem>                         |

Table S1. Canonical SMILES.

**Table S2.** Descriptor classes calculated using the PaDEL-Descriptor software.

|                            |
|----------------------------|
| AcidicGroupCount           |
| ALOGP                      |
| APol                       |
| AromaticAtomsCount         |
| AromaticBondsCount         |
| AtomCount                  |
| Autocorrelation            |
| BaryszMatrix               |
| BasicGroupCount            |
| BCUT                       |
| BondCount                  |
| BPol                       |
| BurdenModifiedEigenvalues  |
| CarbonTypes                |
| ChiChain                   |
| ChiCluster                 |
| ChiPathCluster             |
| ChiPath                    |
| Constitutional             |
| Crippen                    |
| DetourMatrix               |
| EccentricConnectivityIndex |
| EStateAtomType             |
| ExtendedTopochemicalAtom   |
| FMF                        |
| FragmentComplexity         |
| HBondAcceptorCount         |
| HBondDonorCount            |
| HybridizationRatio         |
| InformationContent         |
| KappaShapeIndices          |
| LargestChain               |
| LargestPiSystem            |
| LongestAliphaticChain      |
| MannholdLogP               |
| McGowanVolume              |
| MDE                        |
| MLFER                      |
| PathCount                  |
| PetitjeanNumber            |
| RingCount                  |
| RotatableBondsCount        |
| RuleOfFive                 |
| Topological                |

Table S2. Descriptor classes calculated using the PaDEL-Descriptor software. This is the full list of the descriptors classes before applying the filtering and then the step-up procedure.

|                           |
|---------------------------|
| TopologicalCharge         |
| TopologicalDistanceMatrix |
| TPSA                      |
| VABC                      |
| VAdjMa                    |
| WalkCount                 |
| Weight                    |
| WeightedPath              |
| WienerNumbers             |
| XLogP                     |
| ZagrebIndex               |

### **Fingerprints**

|                                |
|--------------------------------|
| PubchemFingerprinter           |
| SubstructureFingerprinter      |
| SubstructureFingerprinterCount |

Table S2. Descriptor classes calculated using the PaDEL-Descriptor software. This is the full list of the descriptors classes before applying the filtering and then the step-up procedure.

**Table S3.** Experimental and predicted Log BT values.

| ID | Name                                               | Log BT | Ta    | Ta*   | Ta+Nt | Ta*+Nt | Pe+Pg | Pe | Pg |
|----|----------------------------------------------------|--------|-------|-------|-------|--------|-------|----|----|
| 2  | Tramadol                                           | -0.02  | -0.72 | -0.60 | -0.07 | -0.11  |       |    |    |
| 4  | Oxazepam                                           | -0.05  | -0.27 | -0.13 | -1.00 | -0.93  |       |    |    |
| 6  | Carbamazepine-10,11-epoxide                        | -0.05  | -0.19 | -0.04 | -0.63 | -1.27  |       |    |    |
| 7  | 4-hydroxy-1H-benzotriazole                         | -0.07  | -0.28 | -0.14 | -0.73 | -1.75  |       |    |    |
| 8  | Sotalol                                            | -0.08  | -0.12 | 0.03  | -0.05 | -0.10  |       |    |    |
| 9  | Propranolol                                        | -0.04  | -0.34 | -0.20 | -0.17 | -0.34  |       |    |    |
| 10 | Hydrochlorothiazide                                | -0.10  | 0.18  | 0.34  | 0.05  | -0.01  |       |    |    |
| 11 | Fluconazole                                        | -0.08  | -0.22 | -0.08 | -0.41 | -0.99  |       |    |    |
| 12 | Venlafaxine                                        | -0.06  | -0.64 | -0.51 | -0.04 | -0.06  |       |    |    |
| 13 | Metoprolol                                         | -0.08  | -0.13 | 0.01  | -0.05 | -0.28  |       |    |    |
| 14 | Gabapentin                                         | -0.09  | -0.34 | -0.20 | -1.50 | -0.79  |       |    |    |
| 15 | Furosemide                                         | -0.22  | -0.14 | 0.00  | -0.97 | -0.45  |       |    |    |
| 16 | Diclofenac                                         | -0.19  | -0.56 | -0.43 | -1.13 | 0.12   |       |    |    |
| 18 | Atenolol                                           | -0.57  | -0.51 | -0.38 | -1.07 | -0.59  |       |    |    |
| 20 | Valsartan                                          | -0.54  | -0.97 | -0.86 | -0.22 | -1.17  |       |    |    |
| 21 | Ketoprofen                                         | -0.70  | -0.55 | -0.42 | -0.97 | -1.48  |       |    |    |
| 22 | Metoprolol acid                                    | -0.74  | -0.49 | -0.36 | -1.08 | -0.69  |       |    |    |
| 24 | Sulfamethoxazole                                   | -1.00  | -1.15 | -1.05 | -1.30 | -0.25  |       |    |    |
| 25 | Aniline                                            | -0.85  | 0.29  |       | -0.93 |        |       |    |    |
| 27 | Acesulfame                                         | -1.10  | -1.25 | -1.15 | -1.79 | -1.18  |       |    |    |
| 29 | Acetaminophen                                      | -2.44  | -1.06 |       | -1.66 |        |       |    |    |
| 30 | Caffeine                                           | -2.92  | -2.58 | -2.54 | -2.16 | -1.60  |       |    |    |
| 31 | (-)-Erythromycin                                   | -0.30  |       |       |       |        |       |    |    |
| 32 | (±)-Abscisic acid                                  | -2.29  |       |       |       |        |       |    |    |
| 33 | (S)-Nicotine                                       | -1.87  |       |       |       |        |       |    |    |
| 34 | 1-(2-Morpholinophenyl)dihydro-1H-pyrrole-2,5-dione | -1.82  |       |       |       |        |       |    |    |

Table S3. Experimental and predicted Log BT values. Log BT: experimental value. Datasets: Ta = target chemicals, Ta\* = target chemicals -> endpoint outliers removed, Ta+Nt = Target and non-target chemicals, Ta\*+Nt = target chemicals-> endpoint outliers removed and non-target chemicals, Pe+Pg = PEGs and PPGs, Pe = PEGs, Pg = PPGs. Row colors -> gray and dark gray: target analysis chemicals (gray: used for Ta\*), orange and dark orange: non-target analysis chemicals (dark orange: used for Ta\*+Nt), green: PEGs (Pe), dark green: PPGs (Pg). Cell colors: red: training set, blue: test set.

| ID | Name                                                         | Log BT | Ta | Ta* | Ta+Nt | Ta*+Nt | Pe+Pg | Pe | Pg |
|----|--------------------------------------------------------------|--------|----|-----|-------|--------|-------|----|----|
| 35 | 1-Aminocyclohexanecarboxylic acid                            | -2.73  |    |     | -1.76 | -1.02  |       |    |    |
| 36 | 1-Methyluric acid                                            | -1.80  |    |     | -1.58 | -2.70  |       |    |    |
| 37 | 1,2-Benzisothiazolin-3-one                                   | -0.41  |    |     |       |        |       |    |    |
| 38 | 1,7-Dimethyluric acid                                        | -1.55  |    |     | -1.45 | -2.31  |       |    |    |
| 39 | 10-Hydroxycarbazepine                                        | -2.72  |    |     | -1.06 | -1.36  |       |    |    |
| 40 | 15-Deoxy- $\Delta$ 12,14-prostaglandin A1                    | -2.30  |    |     |       |        |       |    |    |
| 41 | 16 $\alpha$ -Hydroxyestrone                                  | -1.73  |    |     |       |        |       |    |    |
| 42 | 17 $\alpha$ -Hydroxyprogesterone                             | -2.29  |    |     |       |        |       |    |    |
| 43 | 2-[(Dimethylamino)methylidene]indan-1-one                    | -0.67  |    |     |       |        |       |    |    |
| 44 | 2-[4-(3-Amino-2-hydroxypropoxy)phenyl]acetamide              | -1.22  |    |     | -1.28 | -0.98  |       |    |    |
| 45 | 2-Methoxy-5-methylaniline                                    | -1.63  |    |     | -0.72 |        |       |    |    |
| 46 | 2-Phenylbenzimidazole-5-sulfonic acid                        | -0.03  |    |     | -0.15 | -1.03  |       |    |    |
| 47 | 2,2,6,6-Tetramethyl-1-piperidinol (TEMPO)                    | -1.47  |    |     |       |        |       |    |    |
| 48 | 2,2,6,6-Tetramethyl-4-piperidinol                            | -0.01  |    |     |       |        |       |    |    |
| 49 | 2,3,5,6-Tetramethylpyrazine                                  | -1.49  |    |     |       |        |       |    |    |
| 50 | 2,4-Diaminotoluene                                           | -1.40  |    |     | -0.80 |        |       |    |    |
| 51 | 3-Aminosalicylic acid                                        | -1.47  |    |     |       |        |       |    |    |
| 52 | 3-Hydroxy-2-methylpyridine                                   | -1.31  |    |     |       |        |       |    |    |
| 53 | 3,4-Dimethoxycinnamic acid                                   | -1.85  |    |     |       |        |       |    |    |
| 54 | 3,5-di-tert-Butyl-4-hydroxybenzoic acid                      | -0.02  |    |     |       |        |       |    |    |
| 55 | 3,5-Dimethyl-1-phenylpyrazole                                | -1.14  |    |     | -0.57 | -0.95  |       |    |    |
| 56 | 4-Acetamidobenzaldehyde                                      | -0.57  |    |     | -1.61 |        |       |    |    |
| 57 | 4-Amino-3-hydroxybenzoic acid                                | -0.90  |    |     |       |        |       |    |    |
| 58 | 4-Aminophenol                                                | -0.64  |    |     | -0.88 |        |       |    |    |
| 59 | 4-Hydroxycoumarin                                            | -0.78  |    |     |       |        |       |    |    |
| 60 | 4-Methyl-5-thiazoleethanol                                   | -2.45  |    |     |       |        |       |    |    |
| 61 | 4-tert-Butylcyclohexyl acetate                               | -0.79  |    |     |       |        |       |    |    |
| 62 | 6-(3,4,5-Trimethoxystyryl)-2,3,4,5-tetrahydropyridazin-3-one | -2.20  |    |     |       |        |       |    |    |

Table S3. Experimental and predicted Log BT values. Log BT: experimental value. Datasets: Ta = target chemicals, Ta\* = target chemicals -> endpoint outliers removed, Ta+Nt = Target and non-target chemicals, Ta\*+Nt = target chemicals-> endpoint outliers removed and non-target chemicals, Pe+Pg = PEGs and PPGs, Pe = PEGs, Pg = PPGs. Row colors -> gray and dark gray: target analysis chemicals (gray: used for Ta\*), orange and dark orange: non-target analysis chemicals (dark orange: used for Ta\*+Nt), green: PEGs (Pe), dark green: PPGs (Pg). Cell colors: red: training set, blue: test set.



| ID | Name                                         | Log BT | Ta | Ta* | Ta+Nt | Ta*+Nt | Pe+Pg | Pe | Pg |
|----|----------------------------------------------|--------|----|-----|-------|--------|-------|----|----|
| 63 | 6-Aminocaproic acid                          | -1.65  |    |     | -1.84 | -1.19  |       |    |    |
| 64 | 6-Methyl[1,2,4]triazolo[4,3-b]pyridazin-8-ol | -2.18  |    |     | -2.33 | -2.14  |       |    |    |
| 65 | 6,7-Dihydroxy-4-methylcoumarin               | -1.51  |    |     |       |        |       |    |    |
| 66 | 7-Methylguanine                              | -2.32  |    |     | -2.28 | -2.18  |       |    |    |
| 67 | 7-Methylxanthine                             | -2.53  |    |     | -2.26 | -2.48  |       |    |    |
| 68 | 7 $\alpha$ -Hydroxytestosterone              | -0.49  |    |     |       |        |       |    |    |
| 69 | Acetanilide                                  | -2.90  |    |     | -1.77 |        |       |    |    |
| 70 | Acetylcholine                                | -2.48  |    |     |       |        |       |    |    |
| 71 | Acridine                                     | -2.50  |    |     | -0.34 | -1.05  |       |    |    |
| 72 | Acycloguanosine                              | -1.68  |    |     | -1.97 | -2.01  |       |    |    |
| 73 | Androstenedione                              | -1.74  |    |     |       |        |       |    |    |
| 75 | Azobenzene                                   | -0.52  |    |     | -0.42 | -0.32  |       |    |    |
| 76 | Benzophenone                                 | -0.35  |    |     | 0.13  | -1.24  |       |    |    |
| 77 | Benzoylcegonine                              | -1.27  |    |     |       |        |       |    |    |
| 78 | Bis(2-butoxyethyl) ether                     | -1.79  |    |     |       |        |       |    |    |
| 79 | Bis(2-ethylhexyl) amine                      | -1.82  |    |     |       |        |       |    |    |
| 80 | Cafestol                                     | -1.80  |    |     |       |        |       |    |    |
| 81 | Caprolactam                                  | -0.51  |    |     |       |        |       |    |    |
| 82 | Carbendazim                                  | 0.00   |    |     |       |        |       |    |    |
| 83 | Citroflex 2                                  | -0.80  |    |     |       |        |       |    |    |
| 84 | Citroflex 4                                  | -1.68  |    |     |       |        |       |    |    |
| 85 | Clarithromycin                               | -0.02  |    |     |       |        |       |    |    |
| 86 | Climbazole                                   | -0.06  |    |     | -1.61 | -0.06  |       |    |    |
| 87 | Codeine                                      | -0.83  |    |     |       |        |       |    |    |
| 88 | Cotinine                                     | -1.57  |    |     |       |        |       |    |    |
| 89 | D-Sphingosine                                | -1.39  |    |     |       |        |       |    |    |
| 90 | Decanamide                                   | -1.31  |    |     |       |        |       |    |    |
| 91 | DEET                                         | -0.06  |    |     |       |        |       |    |    |

Table S3. Experimental and predicted Log BT values. Log BT: experimental value. Datasets: Ta = target chemicals, Ta\* = target chemicals -> endpoint outliers removed, Ta+Nt = Target and non-target chemicals, Ta\*+Nt = target chemicals-> endpoint outliers removed and non-target chemicals, Pe+Pg = PEGs and PPGs, Pe = PEGs, Pg = PPGs. Row colors -> gray and dark gray: target analysis chemicals (gray: used for Ta\*), orange and dark orange: non-target analysis chemicals (dark orange: used for Ta\*+Nt), green: PEGs (Pe), dark green: PPGs (Pg). Cell colors: red: training set, blue: test set.

| ID  | Name                          | Log BT | Ta | Ta* | Ta+Nt | Ta*+Nt | Pe+Pg | Pe | Pg |
|-----|-------------------------------|--------|----|-----|-------|--------|-------|----|----|
| 92  | Dehydroepiandrosterone (DHEA) | -1.73  |    |     |       |        |       |    |    |
| 93  | Dibenzylamine                 | -0.24  |    |     | -0.18 | -0.76  |       |    |    |
| 94  | Dibutyl phosphate             | -0.60  |    |     |       |        |       |    |    |
| 95  | Diethyl phosphate             | -0.10  |    |     |       |        |       |    |    |
| 96  | Diethyl phthalate             | -0.10  |    |     |       |        |       |    |    |
| 97  | Diglyme                       | -0.76  |    |     |       |        |       |    |    |
| 98  | Diketo-Metribuzin             | -0.66  |    |     |       |        |       |    |    |
| 99  | DL-Carnitine                  | -1.67  |    |     |       |        |       |    |    |
| 100 | Ecgonine                      | -0.86  |    |     |       |        |       |    |    |
| 101 | Ethyl paraben                 | -0.34  |    |     | -1.66 |        |       |    |    |
| 102 | Ferulic acid                  | -1.43  |    |     | -1.49 |        |       |    |    |
| 103 | Galaxolidone                  | -1.96  |    |     |       |        |       |    |    |
| 104 | Guaifenesin                   | -1.13  |    |     | -0.47 | -0.49  |       |    |    |
| 105 | Guanine                       | -1.21  |    |     |       |        |       |    |    |
| 106 | Histamine                     | -2.47  |    |     |       |        |       |    |    |
| 107 | Ibuprofen                     | -2.74  |    |     |       |        |       |    |    |
| 108 | Icaridin                      | -1.04  |    |     |       |        |       |    |    |
| 109 | Indole-3-butyric acid         | -2.65  |    |     | -2.05 | -1.23  |       |    |    |
| 110 | Indole-3-pyruvic acid         | -2.82  |    |     | -2.10 | -1.85  |       |    |    |
| 111 | Isoprenaline                  | -0.48  |    |     | -0.30 | -0.34  |       |    |    |
| 112 | Isotretinoin                  | -2.71  |    |     |       |        |       |    |    |
| 113 | Kahweol                       | -1.45  |    |     |       |        |       |    |    |
| 114 | L-threo-3-Phenylserine        | -1.49  |    |     | -1.53 | -1.90  |       |    |    |
| 115 | Losartan                      | -0.47  |    |     | 0.69  | -0.61  |       |    |    |
| 116 | Mephedrone                    | -0.52  |    |     |       |        |       |    |    |
| 117 | Metamfepramone                | -0.01  |    |     | -1.56 |        |       |    |    |
| 118 | Methyl indole-3-acetate       | -2.56  |    |     | -2.15 | -1.30  |       |    |    |
| 119 | Morphine                      | -1.42  |    |     |       |        |       |    |    |

Table S3. Experimental and predicted Log BT values. Log BT: experimental value. Datasets: Ta = target chemicals, Ta\* = target chemicals -> endpoint outliers removed, Ta+Nt = Target and non-target chemicals, Ta\*+Nt = target chemicals-> endpoint outliers removed and non-target chemicals, Pe+Pg = PEGs and PPGs, Pe = PEGs, Pg = PPGs. Row colors -> gray and dark gray: target analysis chemicals (gray: used for Ta\*), orange and dark orange: non-target analysis chemicals (dark orange: used for Ta\*+Nt), green: PEGs (Pe), dark green: PPGs (Pg). Cell colors: red: training set, blue: test set.

| ID  | Name                            | Log BT | Ta | Ta* | Ta+Nt | Ta*+Nt | Pe+Pg | Pe    | Pg |
|-----|---------------------------------|--------|----|-----|-------|--------|-------|-------|----|
| 120 | N-(2,4-Dimethylphenyl)formamide | -1.03  |    |     | -1.66 |        |       |       |    |
| 121 | N,N-Dimethylaniline             | -0.83  |    |     | -0.77 |        |       |       |    |
| 122 | Nootkatone                      | -0.78  |    |     |       |        |       |       |    |
| 123 | Norfenefrine                    | -0.66  |    |     | -0.71 |        |       |       |    |
| 124 | Oxybenzone                      | -0.55  |    |     | -1.33 | -0.61  |       |       |    |
| 126 | PEG n5                          | -2.01  |    |     |       |        | -2.23 | -2.01 |    |
| 127 | PEG n6                          | -2.13  |    |     |       |        | -2.05 | -2.02 |    |
| 128 | PEG n7                          | -1.92  |    |     |       |        | -1.99 | -2.04 |    |
| 129 | PEG n8                          | -1.44  |    |     |       |        | -1.81 | -1.54 |    |
| 130 | Perillartine                    | -0.91  |    |     |       |        |       |       |    |
| 131 | Phenacetin                      | -0.60  |    |     | -1.42 | -0.19  |       |       |    |
| 132 | Pilocarpine                     | -0.24  |    |     |       |        |       |       |    |
| 133 | Polygodial                      | -1.29  |    |     |       |        |       |       |    |
| 134 | PPG n4                          | -0.43  |    |     |       |        | -0.18 | -0.53 |    |
| 135 | PPG n5                          | -0.53  |    |     |       |        | -0.53 | -0.47 |    |
| 136 | PPG n6                          | -0.62  |    |     |       |        | -0.75 | -0.53 |    |
| 137 | PPG n7                          | -0.61  |    |     |       |        | -0.95 | -0.65 |    |
| 138 | PPG n8                          | -0.74  |    |     |       |        | -1.09 | -0.79 |    |
| 139 | Pregabalin                      | -1.01  |    |     |       |        |       |       |    |
| 140 | PV9                             | -0.04  |    |     | -1.07 | -0.37  |       |       |    |
| 141 | Pyridostigmine                  | -1.34  |    |     |       |        |       |       |    |
| 142 | Pyroquilon                      | -0.26  |    |     |       |        |       |       |    |
| 143 | Rhodamine 6G                    | -2.57  |    |     |       |        |       |       |    |
| 144 | Ricinine                        | -0.53  |    |     |       |        |       |       |    |
| 145 | Serotonin                       | -0.61  |    |     |       |        |       |       |    |
| 146 | Sulfapyridine                   | -0.36  |    |     | -0.92 | -0.10  |       |       |    |
| 147 | Theobromine                     | -1.90  |    |     | -2.23 | -1.96  |       |       |    |
| 148 | Tranexamic acid                 | -1.14  |    |     |       |        |       |       |    |

Table S3. Experimental and predicted Log BT values. Log BT: experimental value. Datasets: Ta = target chemicals, Ta\* = target chemicals -> endpoint outliers removed, Ta+Nt = Target and non-target chemicals, Ta\*+Nt = target chemicals-> endpoint outliers removed and non-target chemicals, Pe+Pg = PEGs and PPGs, Pe = PEGs, Pg = PPGs. Row colors -> gray and dark gray: target analysis chemicals (gray: used for Ta\*), orange and dark orange: non-target analysis chemicals (dark orange: used for Ta\*+Nt), green: PEGs (Pe), dark green: PPGs (Pg). Cell colors: red: training set, blue: test set.

| ID  | Name                                   | Log BT | Ta | Ta* | Ta+Nt | Ta*+Nt | Pe+Pg | Pe    | Pg |
|-----|----------------------------------------|--------|----|-----|-------|--------|-------|-------|----|
| 149 | Triethyl phosphate                     | -0.10  |    |     |       |        |       |       |    |
| 150 | Triisopropanolamine                    | -0.06  |    |     |       |        |       |       |    |
| 151 | Trilostane                             | -0.95  |    |     |       |        |       |       |    |
| 152 | Trimethoprim                           | -0.89  |    |     |       |        |       |       |    |
| 153 | Tropinone                              | -2.38  |    |     |       |        |       |       |    |
| 154 | Venlafaxine N-Oxide                    | -0.02  |    |     | 0.02  | -0.16  |       |       |    |
| 155 | (+/-)12(13)-DiHOME                     | -2.70  |    |     |       |        |       |       |    |
| 156 | 2,4-Dimethylbenzaldehyde               | -0.29  |    |     |       |        |       |       |    |
| 157 | 2'-Deoxyadenosine                      | -0.97  |    |     |       |        |       |       |    |
| 158 | 3-Hydroxypyridine                      | -2.19  |    |     | -1.55 |        |       |       |    |
| 159 | Acetyl-β-methylcholine                 | -2.50  |    |     |       |        |       |       |    |
| 160 | Alfuzosin                              | -0.18  |    |     |       |        |       |       |    |
| 161 | Bezafibrate                            | -0.92  |    |     | -0.70 | -0.28  |       |       |    |
| 162 | Cocaine                                | -1.78  |    |     |       |        |       |       |    |
| 163 | D-Panthenol                            | -2.17  |    |     |       |        |       |       |    |
| 164 | D,L-Camphor                            | -1.97  |    |     |       |        |       |       |    |
| 165 | Dodecylamine                           | -2.13  |    |     |       |        |       |       |    |
| 166 | Ethylenediaminetetraacetic acid (EDTA) | -0.58  |    |     |       |        |       |       |    |
| 167 | Indole-3-acrylic acid                  | -2.06  |    |     | -2.10 | -1.71  |       |       |    |
| 168 | Isoamylamine                           | -2.05  |    |     |       |        |       |       |    |
| 169 | Methionine                             | -1.60  |    |     |       |        |       |       |    |
| 170 | Methylimidazoleacetic acid             | -2.64  |    |     |       |        |       |       |    |
| 171 | N,N'-Dicyclohexylurea                  | -0.06  |    |     |       |        |       |       |    |
| 172 | Paraxanthine                           | -2.42  |    |     | -2.21 | -1.96  |       |       |    |
| 173 | PEG n10                                | -1.69  |    |     |       |        | -1.67 | -1.61 |    |
| 174 | PEG n11                                | -1.67  |    |     |       |        | -1.62 | -1.67 |    |
| 175 | PEG n12                                | -1.76  |    |     |       |        | -1.58 | -1.73 |    |
| 176 | PEG n13                                | -1.83  |    |     |       |        | -1.54 | -1.80 |    |

Table S3. Experimental and predicted Log BT values. Log BT: experimental value. Datasets: Ta = target chemicals, Ta\* = target chemicals -> endpoint outliers removed, Ta+Nt = Target and non-target chemicals, Ta\*+Nt = target chemicals-> endpoint outliers removed and non-target chemicals, Pe+Pg = PEGs and PPGs, Pe = PEGs, Pg = PPGs. Row colors -> gray and dark gray: target analysis chemicals (gray: used for Ta\*), orange and dark orange: non-target analysis chemicals (dark orange: used for Ta\*+Nt), green: PEGs (Pe), dark green: PPGs (Pg). Cell colors: red: training set, blue: test set.

| ID  | Name                                                 | Log BT | Ta | Ta* | Ta+Nt | Ta*+Nt | Pe+Pg | Pe    | Pg    |
|-----|------------------------------------------------------|--------|----|-----|-------|--------|-------|-------|-------|
| 177 | PEG n14                                              | -1.93  |    |     |       |        | -1.58 | -1.89 |       |
| 178 | PEG n15                                              | -1.93  |    |     |       |        | -1.62 | -1.99 |       |
| 179 | PPG n10                                              | -1.17  |    |     |       |        | -1.31 |       | -1.13 |
| 180 | Thymine                                              | -1.64  |    |     |       |        |       |       |       |
| 181 | $\alpha$ -Eleostearic acid                           | -2.20  |    |     |       |        |       |       |       |
| 183 | 1-(2-Furylmethyl)-5-oxopyrrolidine-3-carboxylic acid | -1.06  |    |     |       |        |       |       |       |
| 184 | 1-(Carboxymethyl)cyclohexanecarboxylic acid          | -1.68  |    |     | -1.44 | -1.35  |       |       |       |
| 185 | 1-Methylguanine                                      | -1.30  |    |     | -2.29 | -2.03  |       |       |       |
| 186 | 1,3,7-Trimethyluric acid                             | -1.53  |    |     | -1.44 | -1.90  |       |       |       |
| 188 | 10-Hydroxydecanoic acid                              | -1.99  |    |     |       |        |       |       |       |
| 189 | 12-Hydroxydodecanoic acid                            | -1.12  |    |     |       |        |       |       |       |
| 190 | 2-Amino-6-methylmercaptapurine                       | -0.02  |    |     |       |        |       |       |       |
| 191 | 2-Deoxyribose 5-phosphate                            | -2.80  |    |     |       |        |       |       |       |
| 192 | 2-Hydroxycinnamic acid                               | -1.38  |    |     | -1.67 |        |       |       |       |
| 193 | 2-Hydroxyhippuric acid                               | -2.80  |    |     |       |        |       |       |       |
| 194 | 2-Naphthalenesulfonic acid                           | -0.56  |    |     |       |        |       |       |       |
| 195 | 2,5-di-tert-Butylhydroquinone                        | -0.02  |    |     |       |        |       |       |       |
| 196 | 3-(4-Hydroxyphenyl)propionic acid                    | -2.54  |    |     | -1.65 |        |       |       |       |
| 197 | 3-Anisic acid                                        | -2.30  |    |     | -1.68 |        |       |       |       |
| 198 | 3-Hydroxydecanoic acid                               | -1.61  |    |     |       |        |       |       |       |
| 199 | 3-Phenoxybenzoic acid                                | -1.23  |    |     | -0.93 | -1.25  |       |       |       |
| 200 | 3-Phenyllactic acid                                  | -2.80  |    |     | -1.65 |        |       |       |       |
| 201 | 3-tert-Butyladipic acid                              | -1.96  |    |     |       |        |       |       |       |
| 202 | 3,3'-Dinitro(1,1'-biphenyl)-4,4'-diamine             | -2.93  |    |     |       |        |       |       |       |
| 203 | 3,4-Dihydroxybenzenesulfonic acid                    | -1.61  |    |     |       |        |       |       |       |
| 204 | 3,7-Dimethyluric acid                                | -1.45  |    |     | -1.48 | -2.16  |       |       |       |
| 205 | 4-Acetamidobenzoic acid                              | -2.21  |    |     | -1.38 |        |       |       |       |
| 206 | 4-Hydroxy-3- methoxyphenylglycol sulfate             | -1.25  |    |     |       |        |       |       |       |

Table S3. Experimental and predicted Log BT values. Log BT: experimental value. Datasets: Ta = target chemicals, Ta\* = target chemicals -> endpoint outliers removed, Ta+Nt = Target and non-target chemicals, Ta\*+Nt = target chemicals-> endpoint outliers removed and non-target chemicals, Pe+Pg = PEGs and PPGs, Pe = PEGs, Pg = PPGs. Row colors -> gray and dark gray: target analysis chemicals (gray: used for Ta\*), orange and dark orange: non-target analysis chemicals (dark orange: used for Ta\*+Nt), green: PEGs (Pe), dark green: PPGs (Pg). Cell colors: red: training set, blue: test set.

| ID  | Name                                                                                 | Log BT | Ta | Ta* | Ta+Nt | Ta*+Nt | Pe+Pg | Pe | Pg |
|-----|--------------------------------------------------------------------------------------|--------|----|-----|-------|--------|-------|----|----|
| 207 | 4-Hydroxyphenylpyruvic acid                                                          | -2.15  |    |     | -1.60 |        |       |    |    |
| 208 | 4-Oxo-6-(3-pyridyl)-2-thioxo-1,2,3,4-tetrahydropyrimidine-5-carbonitrile             | -1.23  |    |     | -2.01 | -2.40  |       |    |    |
| 209 | 4-Pyridoxic acid                                                                     | -2.30  |    |     |       |        |       |    |    |
| 210 | 5-Hydroxyindole-3-acetic acid                                                        | -1.24  |    |     | -2.06 | -1.44  |       |    |    |
| 211 | 5,7-Dihydroxy-4-methylcoumarin                                                       | -1.00  |    |     |       |        |       |    |    |
| 212 | 6-Methoxysalicylic acid                                                              | -0.25  |    |     |       |        |       |    |    |
| 214 | 8-(4-Sulfophenyl) octanoic acid                                                      | -2.33  |    |     |       |        |       |    |    |
| 215 | 8-Iso-15-keto-prostaglandin-F2 $\beta$                                               | -3.24  |    |     |       |        |       |    |    |
| 216 | 9-Methyluric acid                                                                    | -2.77  |    |     |       |        |       |    |    |
| 218 | Azelaic acid                                                                         | -0.56  |    |     |       |        |       |    |    |
| 219 | Biotin                                                                               | -3.22  |    |     |       |        |       |    |    |
| 220 | Capryloylglycine                                                                     | -1.77  |    |     |       |        |       |    |    |
| 221 | Cholic acid                                                                          | -3.93  |    |     |       |        |       |    |    |
| 222 | Cyclamic acid                                                                        | -1.63  |    |     |       |        |       |    |    |
| 223 | DL-Mandelic acid                                                                     | -1.54  |    |     | -1.74 |        |       |    |    |
| 224 | Dodecanedioic acid                                                                   | -1.66  |    |     |       |        |       |    |    |
| 225 | Dodecyl sulfate                                                                      | -1.41  |    |     |       |        |       |    |    |
| 226 | Equol                                                                                | -0.11  |    |     | -0.21 | -0.31  |       |    |    |
| 227 | Epinephrine                                                                          | -2.71  |    |     | -0.58 |        |       |    |    |
| 229 | Fexofenadine                                                                         | -0.29  |    |     | 0.30  | -0.84  |       |    |    |
| 230 | Hippuric acid                                                                        | -1.06  |    |     | -1.52 |        |       |    |    |
| 232 | Mesalamine                                                                           | -0.34  |    |     |       |        |       |    |    |
| 233 | Mono(2-ethylhexyl) phthalate (MEHP)                                                  | -0.03  |    |     |       |        |       |    |    |
| 234 | Monobutyl phthalate                                                                  | -0.04  |    |     |       |        |       |    |    |
| 235 | Myristyl sulfate                                                                     | -3.39  |    |     |       |        |       |    |    |
| 236 | N-(2-Morpholinoethyl)-4-(1H-pyrazol-1-yl)benzamide                                   | -0.31  |    |     | -1.40 | -0.96  |       |    |    |
| 237 | N-(4,6-Dimethyl-2-pyrimidinyl)-4-[(E)-(2-hydroxybenzylidene)amino]benzenesulfonamide | -1.95  |    |     |       |        |       |    |    |

Table S3. Experimental and predicted Log BT values. Log BT: experimental value. Datasets: Ta = target chemicals, Ta\* = target chemicals -> endpoint outliers removed, Ta+Nt = Target and non-target chemicals, Ta\*+Nt = target chemicals-> endpoint outliers removed and non-target chemicals, Pe+Pg = PEGs and PPGs, Pe = PEGs, Pg = PPGs. Row colors -> gray and dark gray: target analysis chemicals (gray: used for Ta\*), orange and dark orange: non-target analysis chemicals (dark orange: used for Ta\*+Nt), green: PEGs (Pe), dark green: PPGs (Pg). Cell colors: red: training set, blue: test set.

| ID  | Name                                                       | Log BT | Ta | Ta* | Ta+Nt | Ta*+Nt | Pe+Pg | Pe | Pg |
|-----|------------------------------------------------------------|--------|----|-----|-------|--------|-------|----|----|
| 238 | N-Acetyl-4-aminosalicylic acid                             | -1.83  |    |     |       |        |       |    |    |
| 239 | N-Acetyl-DL-tryptophan                                     | -1.63  |    |     | -1.86 | -1.52  |       |    |    |
| 240 | N-Acetyl-L-phenylalanine                                   | -1.41  |    |     | -1.49 | -1.56  |       |    |    |
| 241 | N-Acetyl-L-tyrosine                                        | -1.32  |    |     | -1.42 | -1.35  |       |    |    |
| 242 | N2-[2-(2-Pyridyl)ethyl]-4-hydroxyquinazoline-2-carboxamide | -1.43  |    |     | -1.49 | -1.53  |       |    |    |
| 245 | Porphobilinogen                                            | -1.34  |    |     |       |        |       |    |    |
| 246 | Propylparaben                                              | -0.78  |    |     |       |        |       |    |    |
| 247 | Saccharin                                                  | -2.39  |    |     |       |        |       |    |    |
| 248 | Tetradecanedioic acid                                      | -1.64  |    |     |       |        |       |    |    |
| 249 | Theophylline                                               | -1.99  |    |     | -2.19 | -1.83  |       |    |    |
| 250 | Xylenesulfonate                                            | -1.77  |    |     |       |        |       |    |    |
| 251 | $\beta$ -D-Glucopyranuronic acid                           | -3.57  |    |     |       |        |       |    |    |
| 252 | 16-Hydroxyhexadecanoic acid                                | -2.17  |    |     |       |        |       |    |    |
| 253 | 2'-Deoxyuridine                                            | -1.29  |    |     |       |        |       |    |    |
| 254 | 2'-O-Methylguanosine                                       | -1.66  |    |     |       |        |       |    |    |
| 255 | 3-Indoxyl sulphate                                         | -2.62  |    |     | -1.13 | -0.58  |       |    |    |
| 256 | 3-Methylxanthine                                           | -3.51  |    |     | -2.31 | -2.30  |       |    |    |
| 257 | 4-Acetamidobutanoic acid                                   | -2.21  |    |     |       |        |       |    |    |
| 258 | 4'-Hydroxydiclofenac                                       | -0.29  |    |     | -1.09 | 0.35   |       |    |    |
| 260 | D-(-)-Quinic acid                                          | -1.39  |    |     |       |        |       |    |    |
| 261 | Desthiobiotin                                              | -1.63  |    |     |       |        |       |    |    |
| 262 | Glycoursodeoxycholic acid                                  | -2.19  |    |     |       |        |       |    |    |
| 263 | Glycyl-L-leucine                                           | -2.28  |    |     |       |        |       |    |    |
| 264 | Guanosine                                                  | -1.86  |    |     |       |        |       |    |    |
| 265 | Hypoxanthine                                               | -2.75  |    |     |       |        |       |    |    |
| 266 | Indole-3-lactic acid                                       | -2.17  |    |     | -2.09 | -1.67  |       |    |    |
| 267 | L-Tyrosine                                                 | -1.38  |    |     | -1.53 |        |       |    |    |
| 268 | Leucylproline                                              | -2.32  |    |     |       |        |       |    |    |

Table S3. Experimental and predicted Log BT values. Log BT: experimental value. Datasets: Ta = target chemicals, Ta\* = target chemicals -> endpoint outliers removed, Ta+Nt = Target and non-target chemicals, Ta\*+Nt = target chemicals-> endpoint outliers removed and non-target chemicals, Pe+Pg = PEGs and PPGs, Pe = PEGs, Pg = PPGs. Row colors -> gray and dark gray: target analysis chemicals (gray: used for Ta\*), orange and dark orange: non-target analysis chemicals (dark orange: used for Ta\*+Nt), green: PEGs (Pe), dark green: PPGs (Pg). Cell colors: red: training set, blue: test set.

| ID  | Name                     | Log BT | Ta | Ta* | Ta+Nt | Ta*+Nt | Pe+Pg | Pe | Pg |
|-----|--------------------------|--------|----|-----|-------|--------|-------|----|----|
| 269 | Methylmalonic acid       | -0.99  |    |     |       |        |       |    |    |
| 271 | N-Acetylanthranilic acid | -0.73  |    |     | -1.43 |        |       |    |    |
| 272 | Pantothenic acid         | -2.38  |    |     |       |        |       |    |    |
| 273 | Probenecid               | -0.03  |    |     |       |        |       |    |    |
| 274 | Thymidine                | -1.11  |    |     |       |        |       |    |    |
| 275 | Uric acid                | -2.81  |    |     | -1.52 | -2.16  |       |    |    |
| 276 | Uridine                  | -1.50  |    |     |       |        |       |    |    |

Table S3. Experimental and predicted Log BT values. Log BT: experimental value. Datasets: Ta = target chemicals, Ta\* = target chemicals -> endpoint outliers removed, Ta+Nt = Target and non-target chemicals, Ta\*+Nt = target chemicals-> endpoint outliers removed and non-target chemicals, Pe+Pg = PEGs and PPGs, Pe = PEGs, Pg = PPGs. Row colors -> gray and dark gray: target analysis chemicals (gray: used for Ta\*), orange and dark orange: non-target analysis chemicals (dark orange: used for Ta\*+Nt), green: PEGs (Pe), dark green: PPGs (Pg). Cell colors: red: training set, blue: test set.



| Name          | QSPR      | Pattern   | Description                                                                                                                                                                                                                                                                                                                   |
|---------------|-----------|-----------|-------------------------------------------------------------------------------------------------------------------------------------------------------------------------------------------------------------------------------------------------------------------------------------------------------------------------------|
| MATS2m        | Ta<br>Ta* |           | Moran autocorrelation - lag 2 / weighted by mass                                                                                                                                                                                                                                                                              |
| VR3_Dzs       | Ta+Nt     |           | Logarithmic Randic-like eigenvector-based index from Barysz matrix / weighted by I-state                                                                                                                                                                                                                                      |
| PubchemFP373  | Ta+Nt     | C(~H)(:N) | Simple atom nearest neighbours - These bits test for the presence of atom nearest neighbour patterns, regardless of bond order (denoted by "~") or count, but where bond aromaticity (denoted by ":") is significant.                                                                                                         |
| PubchemFP420  | Ta+Nt     | C=O       | Detailed atom neighbourhoods - These bits test for the presence of detailed atom neighbourhood patterns, regardless of count, but where bond orders are specific, bond aromaticity matches both single and double bonds, and where "-", "=", and "#" matches a single bond, double bond, and triple bond order, respectively. |
| AATS1s        | Ta*+Nt    |           | Average Broto-Moreau autocorrelation - lag 1 / weighted by I-state                                                                                                                                                                                                                                                            |
| ETA_Beta_ns_d | Ta*+Nt    |           | A measure of lone electrons entering into resonance                                                                                                                                                                                                                                                                           |
| GATS8s        | Pe        |           | Geary autocorrelation - lag 8 / weighted by I-state                                                                                                                                                                                                                                                                           |
| ATSC7s        | Pg        |           | Centered Broto-Moreau autocorrelation - lag 7 / weighted by I-state                                                                                                                                                                                                                                                           |
| hmax          | Pe+Pg     |           | Maximum H E-State                                                                                                                                                                                                                                                                                                             |

**Table S4.** Descriptors of the QSPRs. Ta = target chemicals, Ta\* = target chemicals -> endpoint outliers removed, Ta+Nt = Target and non-target chemicals, Ta\*+Nt = target chemicals-> endpoint outliers removed and non-target chemicals, Pe+Pg = PEGs and PPGs, Pe = PEGs, Pg = PPGs.

## Chemical structures

Chemical structures S1. Target chemicals.

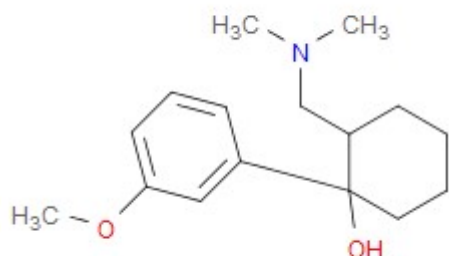

[ID 2] Tramadol

Ta Ta\* Ta+Nt Ta\*+Nt

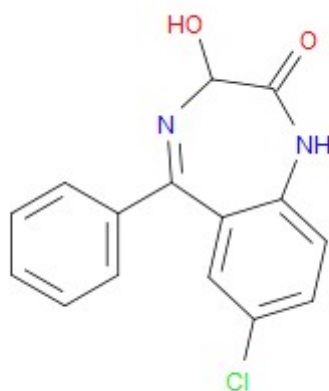

[ID 4] Oxazepam

Ta Ta\* Ta+Nt Ta\*+Nt

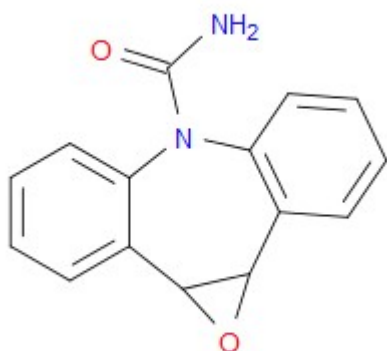

[ID 6] Carbamazepine-10,11-epoxide

Ta Ta\* Ta+Nt Ta\*+Nt

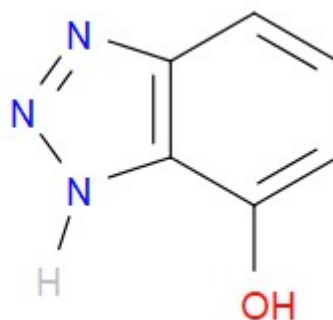

[ID 7] 4-Hydroxy-1H-benzotriazole

Ta Ta\* Ta+Nt Ta\*+Nt

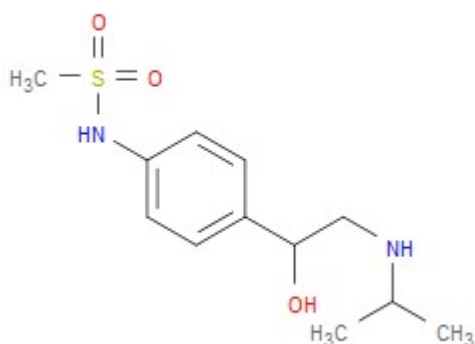

[ID 8] Sotalol

Ta Ta\* Ta+Nt Ta\*+Nt

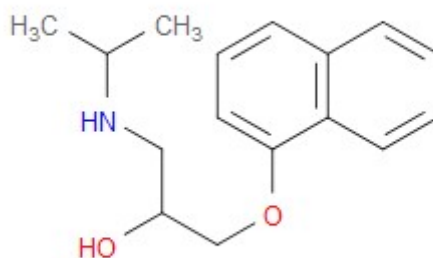

[ID 9] Propranolol

Ta Ta\* tant Ta\*+Nt

Chemical structures S1. Target chemicals. Datasets: Ta = target chemicals, Ta\* = target chemicals -> endpoint outliers removed, Ta+Nt = target and non-target chemicals, Ta\*+Nt = target chemicals -> endpoint outliers removed and non-target analysis chemicals. Red: training set.

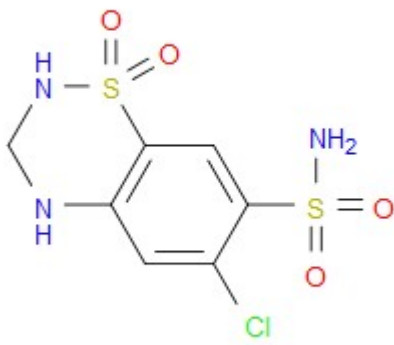

[ID 10] hydrochlorothiazide

Ta Ta\* Ta+Nt Ta\*+Nt

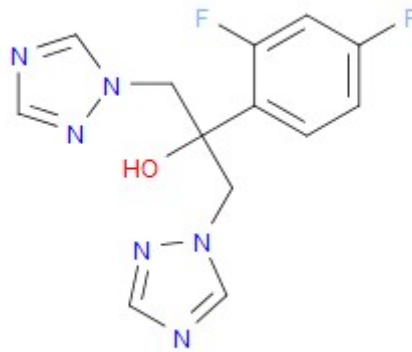

[ID 11] fluconazole

Ta Ta\* Ta+Nt Ta\*+Nt

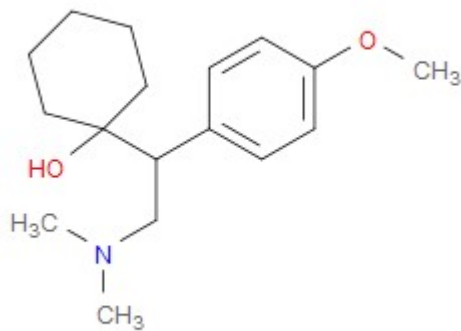

[ID 12] venlafaxine

Ta Ta\* Ta+Nt Ta\*+Nt

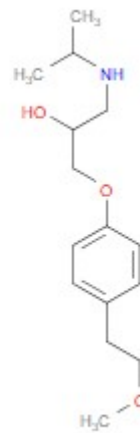

[ID 13] metoprolol

Ta Ta\* Ta+Nt Ta\*+Nt

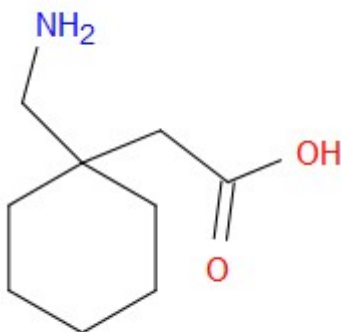

[ID 14] gabapentin

Ta Ta\* Ta+Nt Ta\*+Nt

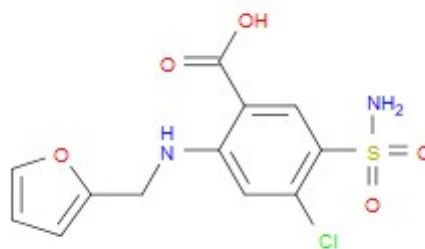

[ID 15] furosemide

Ta Ta\* Ta+Nt Ta\*+Nt

Chemical structures S1. Target chemicals. Datasets: Ta = target chemicals, Ta\* = target chemicals -> endpoint outliers removed, Ta+Nt = target and non-target chemicals, Ta\*+Nt = target chemicals -> endpoint outliers removed and non-target analysis chemicals. Red: training set.

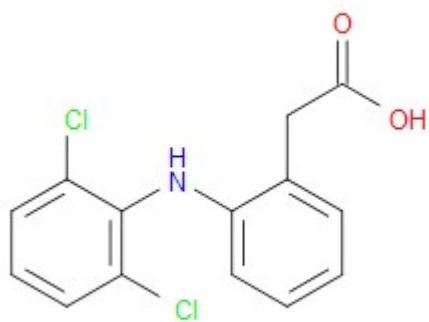

[ID 16] diclofenac

Ta Ta\* Ta+Nt Ta\*+Nt

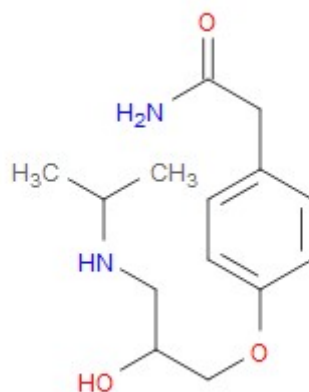

[ID 18] atenolol

Ta Ta\* Ta+Nt Ta\*+Nt

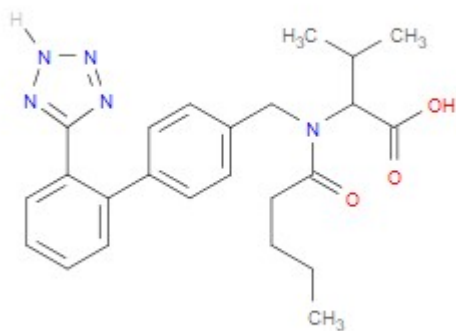

[ID 20] valsartan

Ta Ta\* Ta+Nt Ta\*+Nt

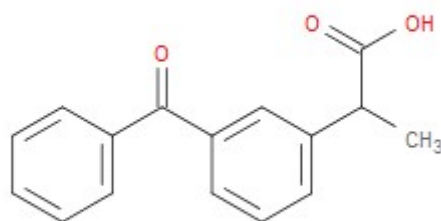

[ID 21] ketoprofen

Ta Ta\* Ta+Nt Ta\*+Nt

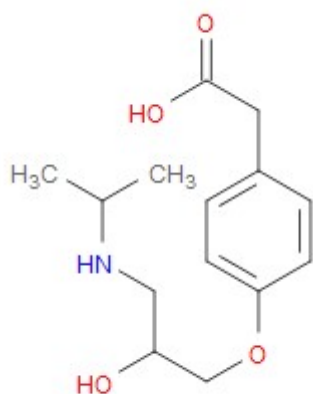

[ID 22] metoprolol acid

Ta Ta\* Ta+Nt Ta\*+Nt

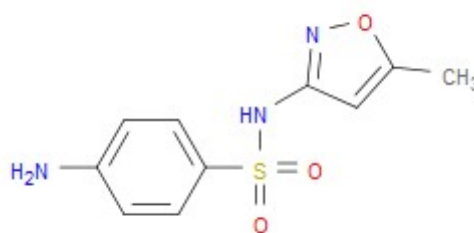

[ID 24] sulfamethoxazole

Ta Ta\* Ta+Nt Ta\*+Nt

Chemical structures S1. Target chemicals. Datasets: Ta = target chemicals, Ta\* = target chemicals -> endpoint outliers removed, Ta+Nt = target and non-target chemicals, Ta\*+Nt = target chemicals -> endpoint outliers removed and non-target analysis chemicals. Red: training set.

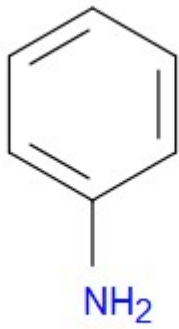

[ID 25] aniline

Ta Ta+Nt

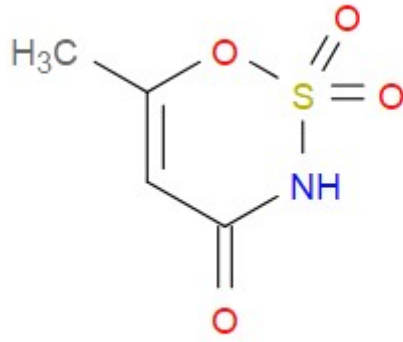

[ID 27] acesulfame

Ta Ta\* Ta+Nt Ta\*+Nt

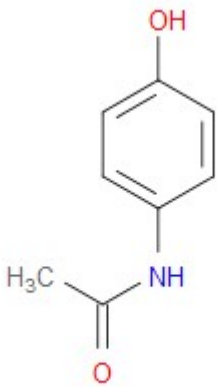

[ID 29] acetaminophen

Ta Ta+Nt

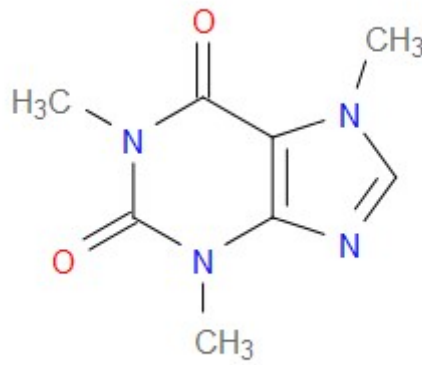

[ID 30] caffeine

Ta Ta\* Ta+Nt Ta\*+Nt

Chemical structures S1. Target chemicals. Datasets: Ta = target chemicals, Ta\* = target chemicals -> endpoint outliers removed, Ta+Nt = target and non-target chemicals, Ta\*+Nt = target chemicals -> endpoint outliers removed and non-target analysis chemicals. Red: training set.

Chemical structures S2. Non-target chemicals.

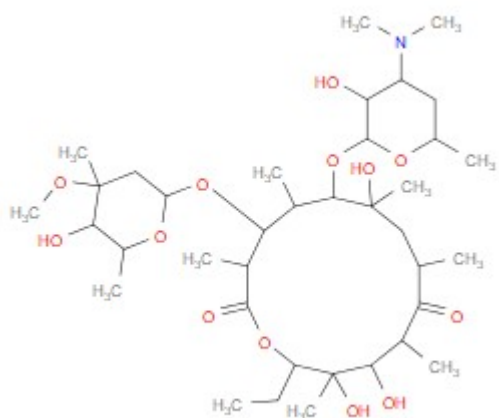

[ID 31] (-)-Erythromycin

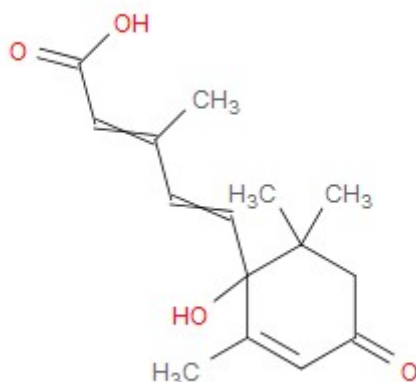

[ID 32] (±)-Abscisic acid

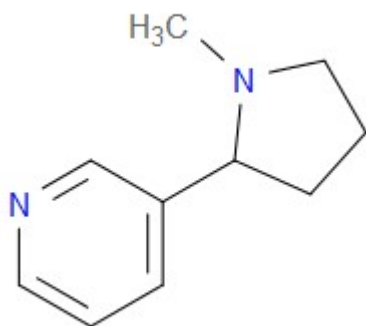

[ID 33] (S)-Nicotine

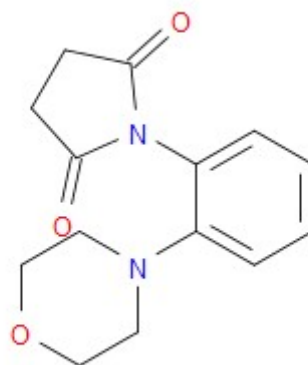

[ID 34] 1-(2-Morpholinophenyl) dihydro-1H-pyrrole-2,5-dione

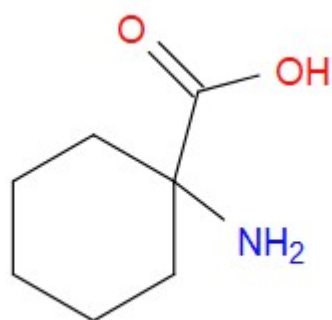

[ID 35]  
1-Aminocyclohexanecarboxylic acid

Ta+Nt Ta\*+Nt

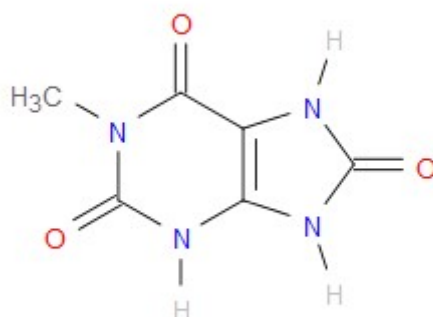

[ID 36] 1-Methyluric acid

Ta+Nt Ta\*+Nt

Chemical structures S2. Non-target chemicals. Datasets: Ta+Nt = target and non-target chemicals, Ta\*+Nt = target -> endpoint outliers removed and non-target chemicals, Pe = PEGs, Pg = PPGs, Pe+Pg = PEGs and PPGs. Red: training set, blue: test set.

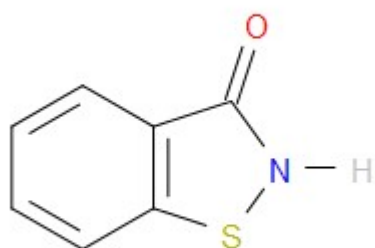

[ID 37] 1,2-Benzisothiazolin-3-one

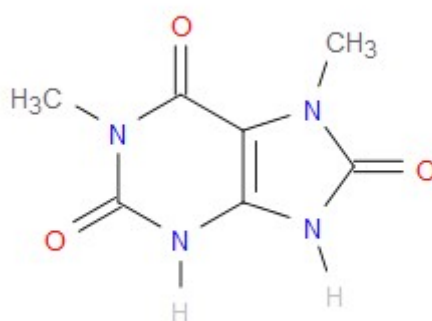

[ID 38] 1,7-Dimethyluric acid  
Ta+Nt Ta\*+Nt

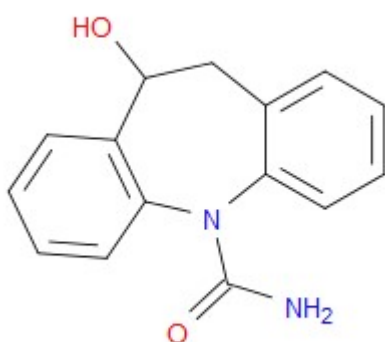

[ID 39] 10-Hydroxycarbazepine  
Ta+Nt Ta\*+Nt

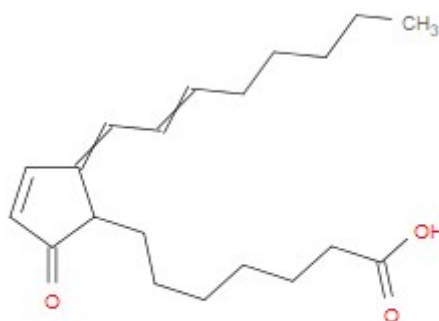

[ID 40] 15-Deoxy- $\Delta$ 12,14-prostaglandin A1

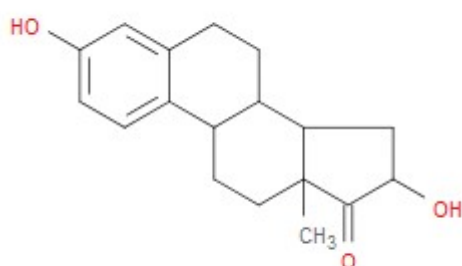

[ID 41] 16 $\alpha$ -Hydroxyestrone

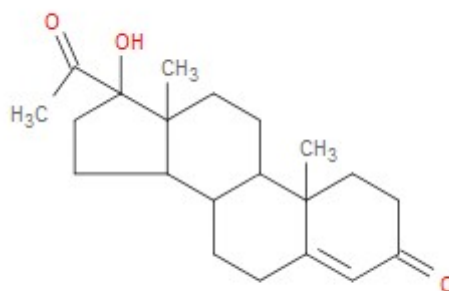

[ID 42] 17 $\alpha$ -Hydroxyprogesterone

Chemical structures S2. Non-target chemicals. Datasets: Ta+Nt = target and non-target chemicals, Ta\*+Nt = target -> endpoint outliers removed and non-target chemicals, Pe = PEGs, Pg = PPGs, Pe+Pg = PEGs and PPGs. Red: training set, blue: test set.

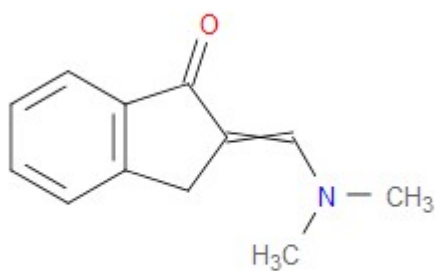

[ID 43] 2-[(Dimethylamino)methylidene]indan-1-one

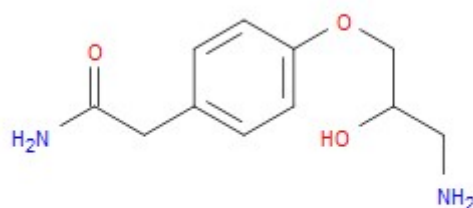

[ID 44] 2-[4-(3-Amino-2-hydroxypropoxy)phenyl]acetamide

Ta+Nt Ta\*+Nt

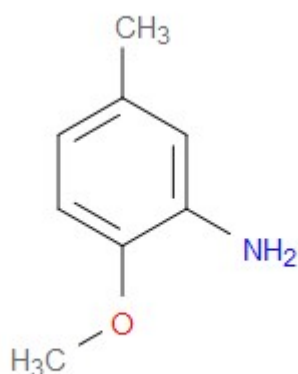

[ID 45] 2-Methoxy-5-methylaniline

Ta+Nt Ta\*+Nt

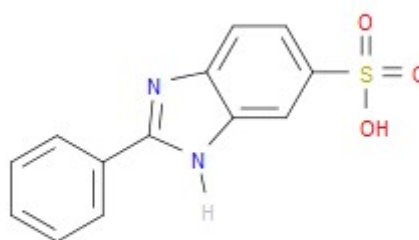

[ID 46] 2-Phenylbenzimidazole-5-sulfonic acid

Ta+Nt Ta\*+Nt

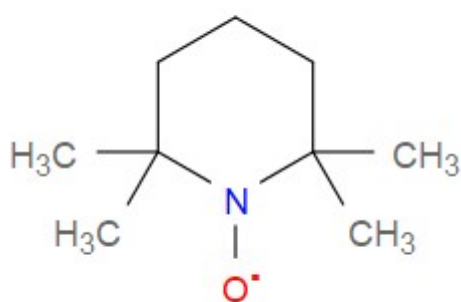

[ID 47] 2,2,6,6-Tetramethyl-1-piperidinol (TEMPO)

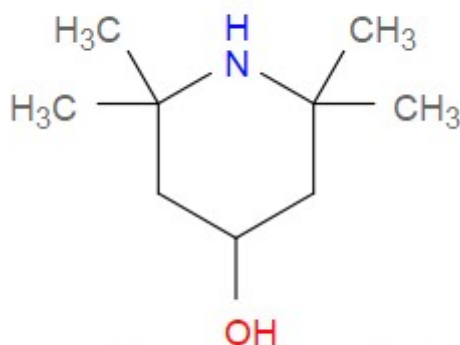

[ID 48] 2,2,6,6-Tetramethyl-4-piperidinol

Chemical structures S2. Non-target chemicals. Datasets: Ta+Nt = target and non-target chemicals, Ta\*+Nt = target -> endpoint outliers removed and non-target chemicals, Pe = PEGs, Pg = PPGs, Pe+Pg = PEGs and PPGs. Red: training set, blue: test set.



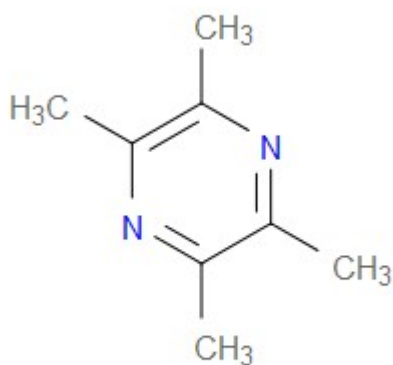

[ID 49] 2,3,5,6-Tetramethylpyrazine

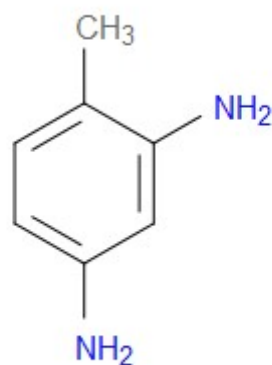

[ID 50] 2,4-Diaminotoluene

Ta+Nt

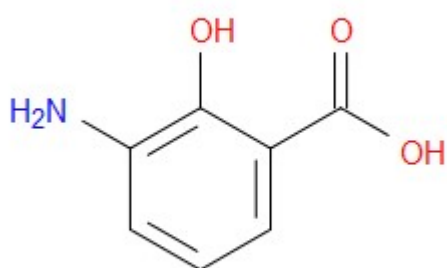

[ID 51] 3-Aminosalicylic acid

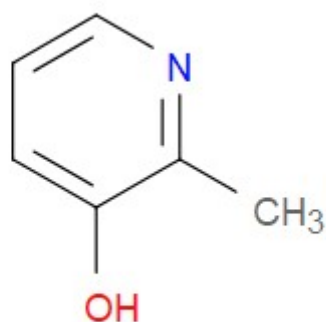

[ID 52] 3-Hydroxy-2-methylpyridine

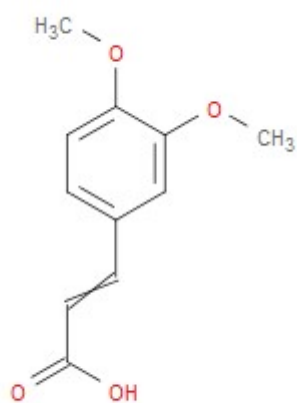

[ID 53] 3,4-Dimethoxycinnamic acid

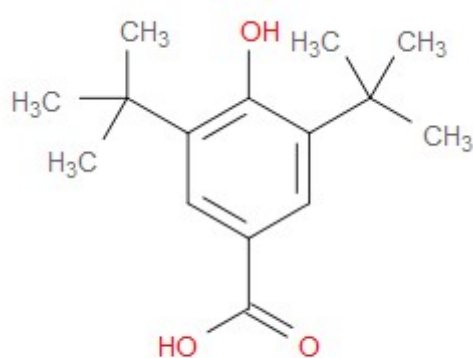

[ID 54] 3,5-di-tert-Butyl-4-hydroxybenzoic acid

Chemical structures S2. Non-target chemicals. Datasets: Ta+Nt = target and non-target chemicals, Ta\*+Nt = target -> endpoint outliers removed and non-target chemicals, Pe = PEGs, Pg = PPGs, Pe+Pg = PEGs and PPGs. Red: training set, blue: test set.

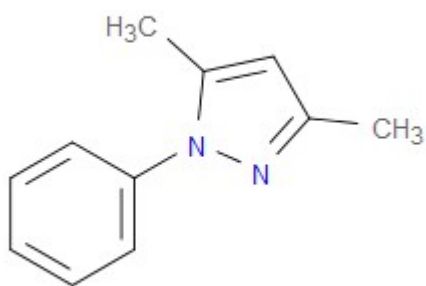

[ID 55] 3,5-Dimethyl-1-phenylpyrazole

Ta+Nt Ta\*+Nt

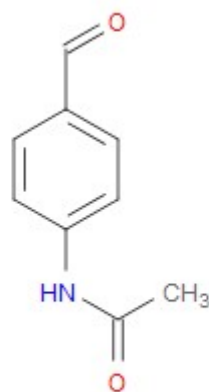

[ID 56] 4-Acetamidobenzaldehyde

Ta+Nt

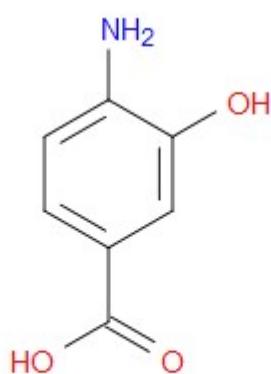

[ID 57] 4-Amino-3-hydroxybenzoic acid

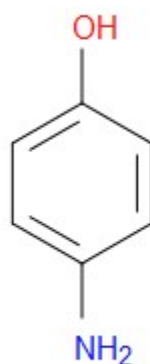

[ID 58] 4-Aminophenol

Ta+Nt

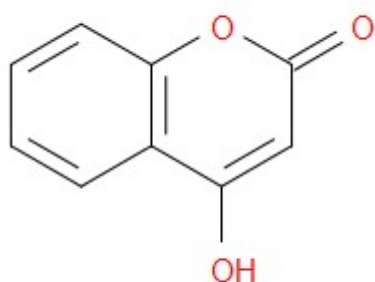

[ID 59] 4-Hydroxycoumarin

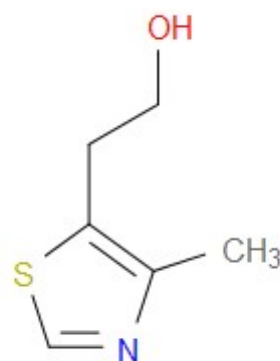

[ID 60] 4-Methyl-5-thiazoleethanol

Chemical structures S2. Non-target chemicals. Datasets: Ta+Nt = target and non-target chemicals, Ta\*+Nt = target -> endpoint outliers removed and non-target chemicals, Pe = PEGs, Pg = PPGs, Pe+Pg = PEGs and PPGs. Red: training set, blue: test set.

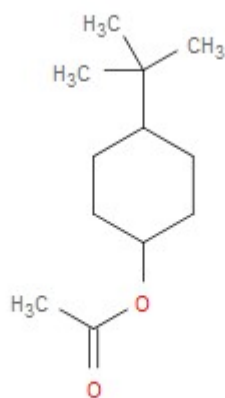

[ID 61] 4-tert-Butylcyclohexyl acetate

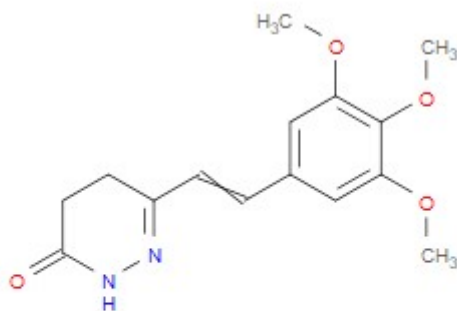

[ID 62] 6-(3,4,5-Trimethoxystyryl)-2,3,4,5-tetrahydropyridazin-3-one

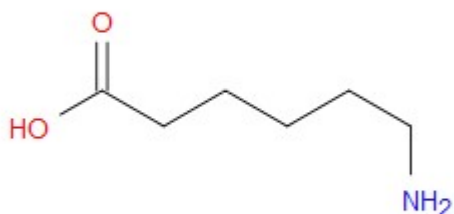

[ID 63] 6-Aminocaproic acid  
Ta+Nt Ta\*+Nt

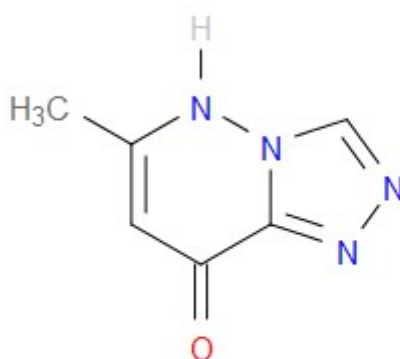

[ID 64] 6-Methyl[1,2,4]triazolo[4,3-b]pyridazin-8-ol  
Ta+Nt Ta\*+Nt

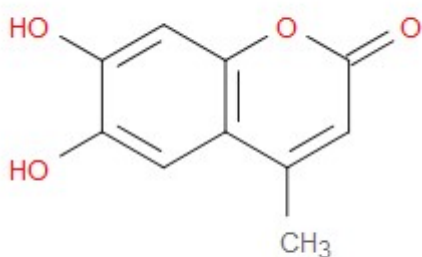

[ID 65] 6,7-Dihydroxy-4-methylcoumarin

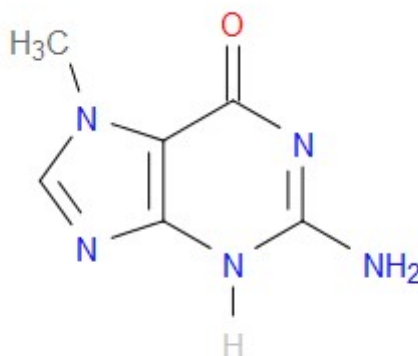

[ID 66] 7-Methylguanine  
Ta+Nt Ta\*+Nt

Chemical structures S2. Non-target chemicals. Datasets: Ta+Nt = target and non-target chemicals, Ta\*+Nt = target -> endpoint outliers removed and non-target chemicals, Pe = PEGs, Pg = PPGs, Pe+Pg = PEGs and PPGs. Red: training set, blue: test set.

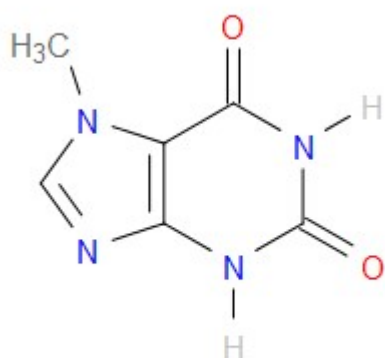

[ID 67] 7-Methylxanthine

Ta+Nt Ta\*+Nt

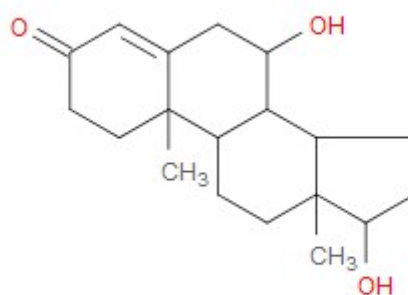

[ID 68] 7α-Hydroxytestosterone

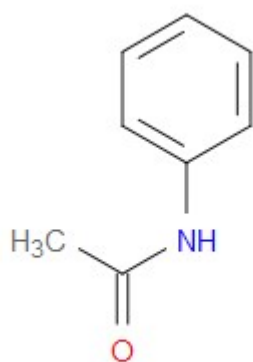

[ID 69] Acetanilide

Ta+Nt

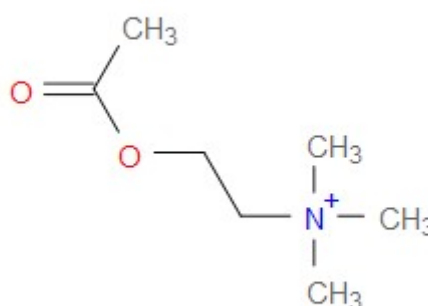

[ID 70] Acetylcholine

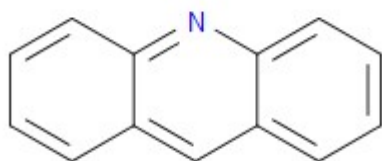

[ID 71] Acridine

Ta+Nt Ta\*+Nt

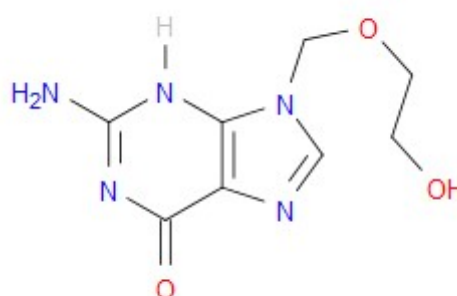

[ID 72] Acycloguanosine

Ta+Nt Ta\*+Nt

Chemical structures S2. Non-target chemicals. Datasets: Ta+Nt = target and non-target chemicals, Ta\*+Nt = target -> endpoint outliers removed and non-target chemicals, Pe = PEGs, Pg = PPGs, Pe+Pg = PEGs and PPGs. Red: training set, blue: test set.

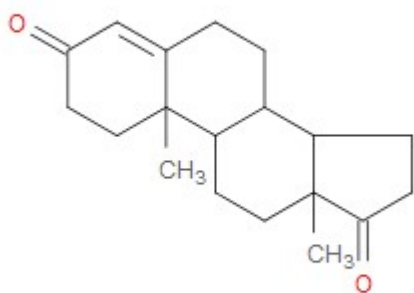

[ID 73] Androstenedione

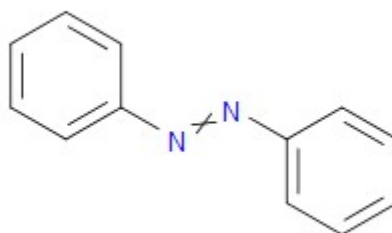

[ID 75] Azobenzene

Ta+Nt Ta\*+Nt

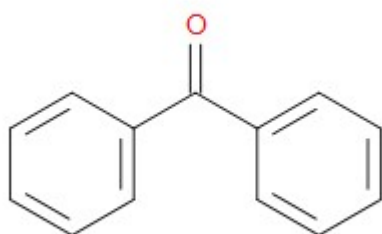

[ID 76] Benzophenone

Ta+Nt Ta\*+Nt

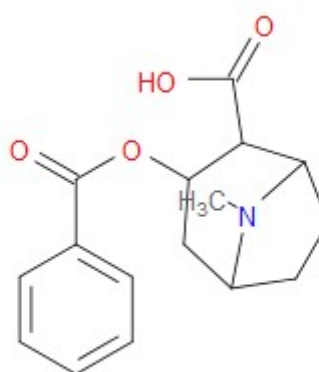

[ID 77] Benzoylecgonine

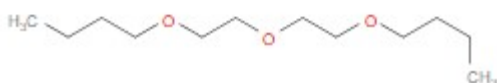

[ID 78] Bis(2-butoxyethyl) ether

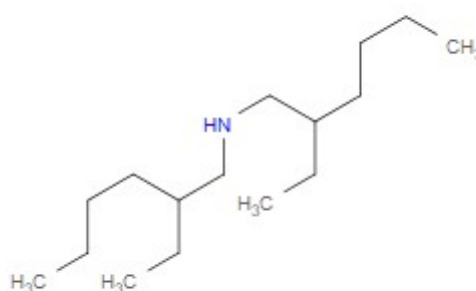

[ID 79] Bis(2-ethylhexyl) amine

Chemical structures S2. Non-target chemicals. Datasets: Ta+Nt = target and non-target chemicals, Ta\*+Nt = target -> endpoint outliers removed and non-target chemicals, Pe = PEGs, Pg = PPGs, Pe+Pg = PEGs and PPGs. Red: training set, blue: test set.

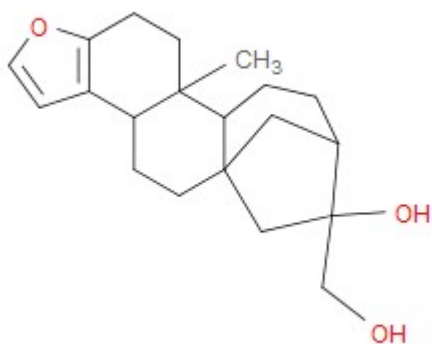

[ID 80] Cafestol

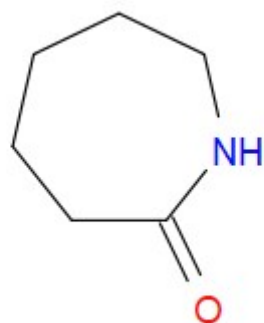

[ID 81] Caprolactam

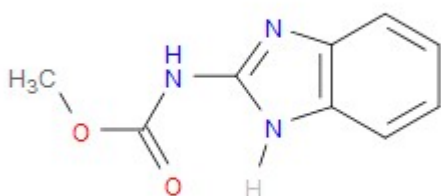

[ID 82] Carbendazim

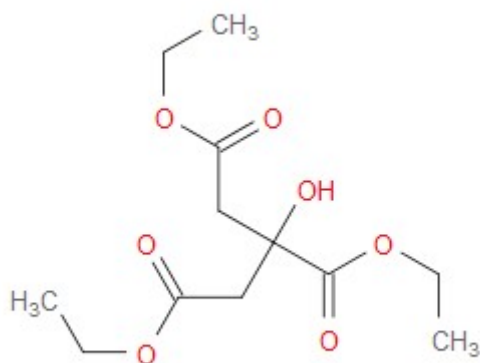

[ID 83] Citroflex 2

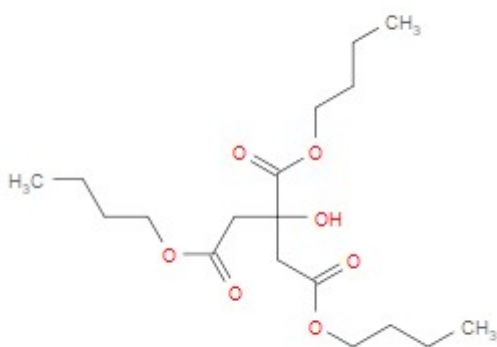

[ID 84] Citroflex 4

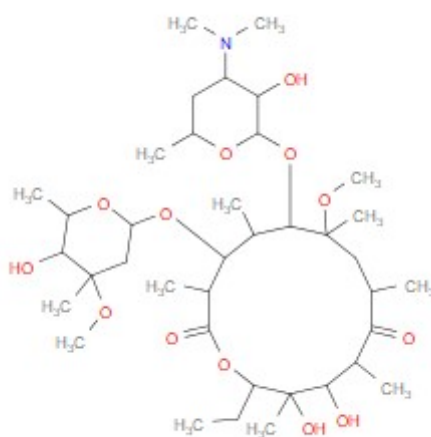

[ID 85] Clarithromycin

Chemical structures S2. Non-target chemicals. Datasets: Ta+Nt = target and non-target chemicals, Ta\*+Nt = target -> endpoint outliers removed and non-target chemicals, Pe = PEGs, Pg = PPGs, Pe+Pg = PEGs and PPGs. Red: training set, blue: test set.

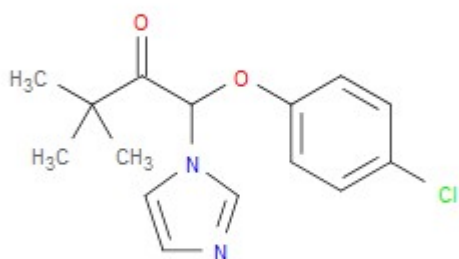

[ID 86] Climbazole

Ta+Nt Ta\*+Nt

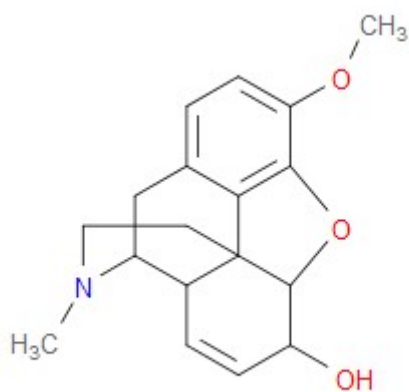

[ID 87] Codeine

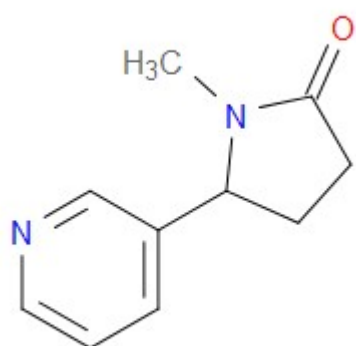

[ID 88] Cotinine

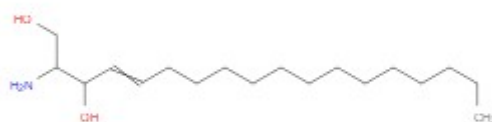

[ID 89] D-Sphingosine

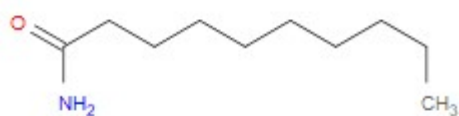

[ID 90] Decanamide

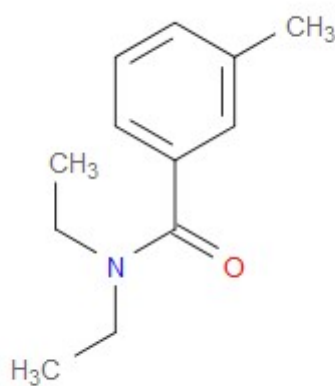

[ID 91] DEET

Chemical structures S2. Non-target chemicals. Datasets: Ta+Nt = target and non-target chemicals, Ta\*+Nt = target -> endpoint outliers removed and non-target chemicals, Pe = PEGs, Pg = PPGs, Pe+Pg = PEGs and PPGs. Red: training set, blue: test set.

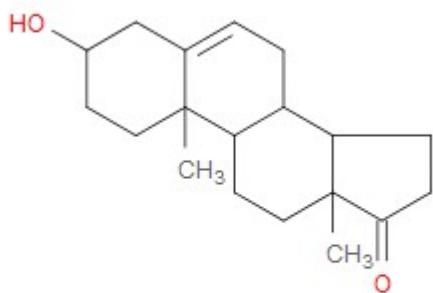

[ID 92] Dehydroepiandrosterone (DHEA)

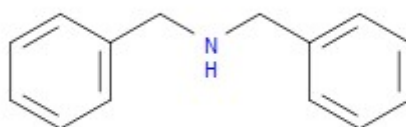

[ID 93] Dibenzylamine  
Ta+Nt Ta\*+Nt

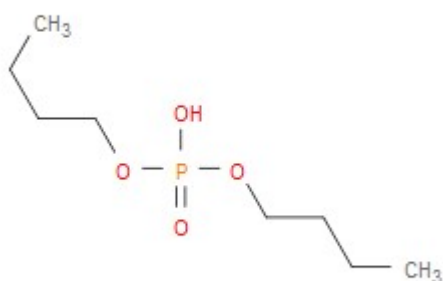

[ID 94] Dibutyl phosphate

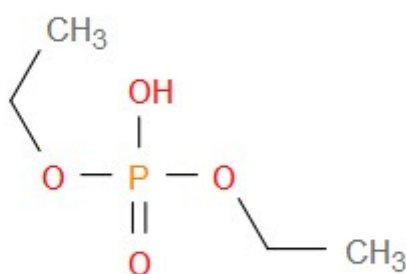

[ID 95] Diethyl phosphate

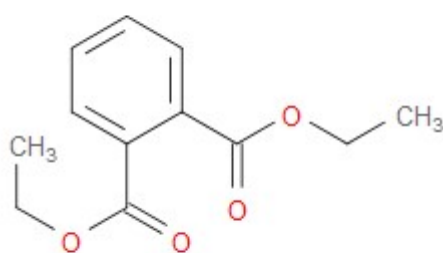

[ID 96] Diethyl phthalate

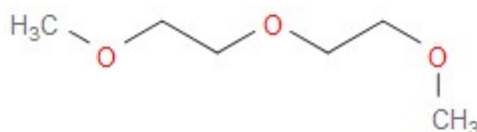

[ID 97] Diglyme

Chemical structures S2. Non-target chemicals. Datasets: Ta+Nt = target and non-target chemicals, Ta\*+Nt = target -> endpoint outliers removed and non-target chemicals, Pe = PEGs, Pg = PPGs, Pe+Pg = PEGs and PPGs. Red: training set, blue: test set.



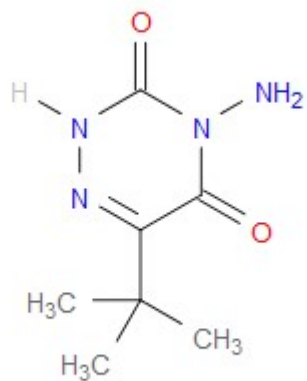

[ID 98] Diketo-Metribuzin

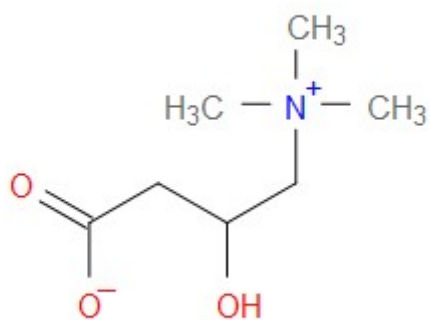

[ID 99] DL-Carnitine

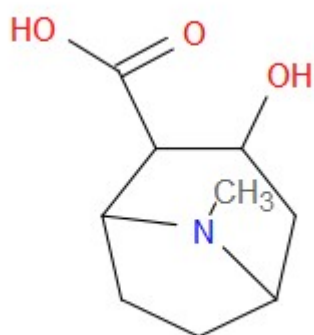

[ID 100] Ecgonine

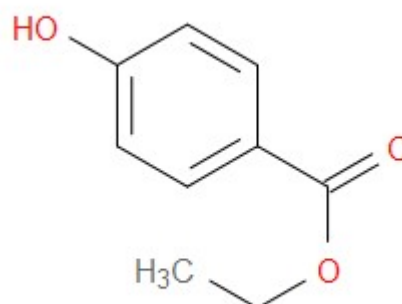

[ID 101] Ethyl paraben

Ta+Nt

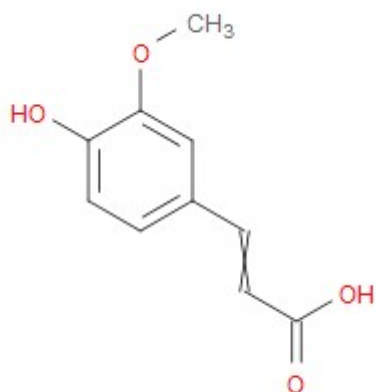

[ID 102] Ferulic acid

Ta+Nt

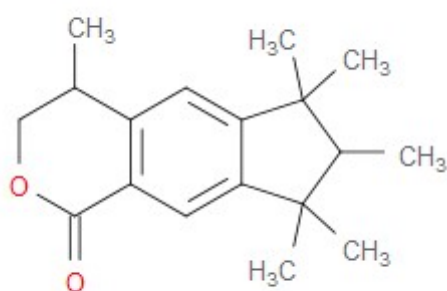

[ID 103] Galaxolidone

Chemical structures S2. Non-target chemicals. Datasets: Ta+Nt = target and non-target chemicals, Ta\*+Nt = target -> endpoint outliers removed and non-target chemicals, Pe = PEGs, Pg = PPGs, Pe+Pg = PEGs and PPGs. Red: training set, blue: test set.

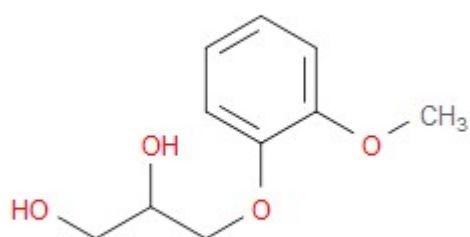

[ID 104] Guaifenesin  
Ta+Nt Ta\*+Nt

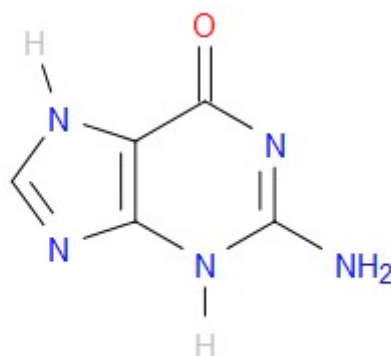

[ID 105] Guanine

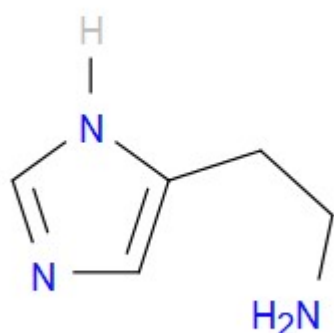

[ID 106] Histamine

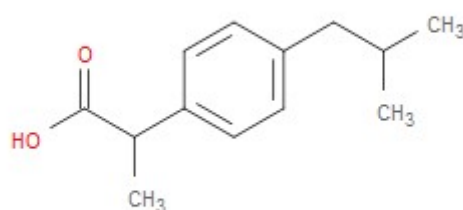

[ID 107] Ibuprofen

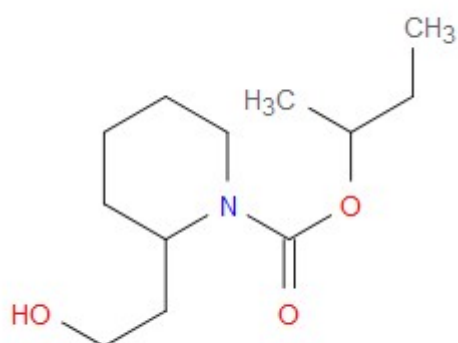

[ID 108] Icaridin

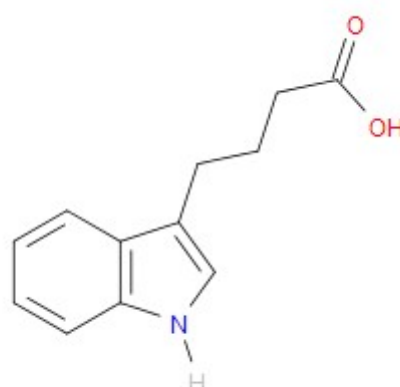

[ID 109] Indole-3-butyric acid  
Ta+Nt Ta\*+Nt

Chemical structures S2. Non-target chemicals. Datasets: Ta+Nt = target and non-target chemicals, Ta\*+Nt = target -> endpoint outliers removed and non-target chemicals, Pe = PEGs, Pg = PPGs, Pe+Pg = PEGs and PPGs. Red: training set, blue: test set.

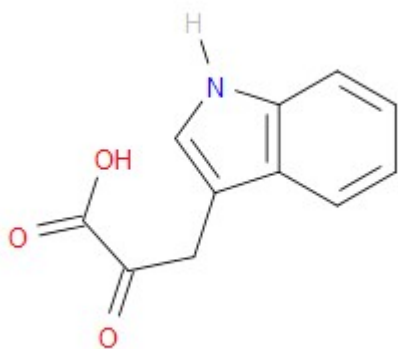

[ID 110] Indole-3-pyruvic acid  
Ta+Nt Ta\*+Nt

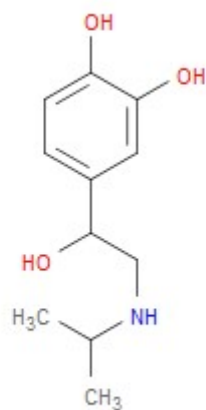

[ID 111] Isoprenaline  
Ta+Nt Ta\*+Nt

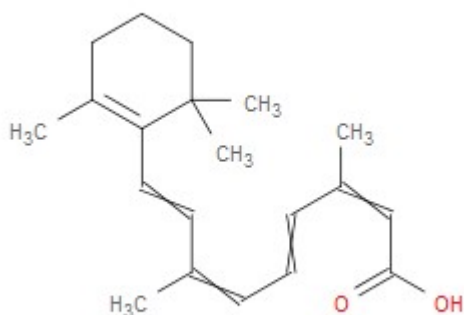

[ID 112] Isotretinoin

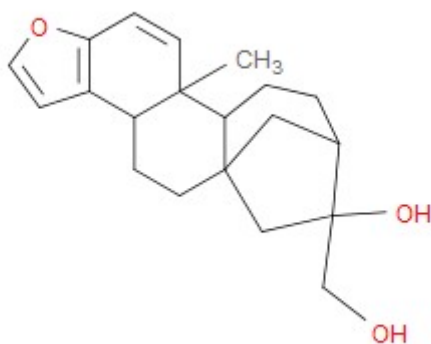

[ID 113] Kahweol

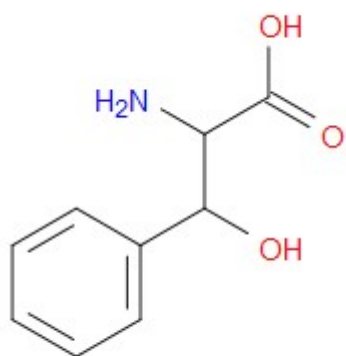

[ID 114] L-threo-3-Phenylserine  
Ta+Nt Ta\*+Nt

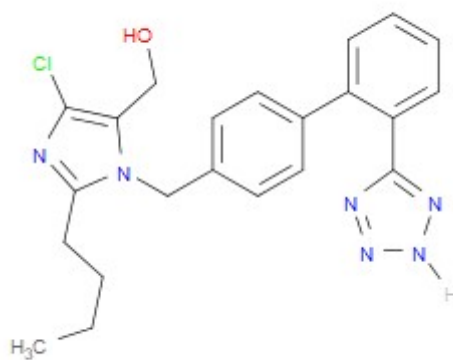

[ID 115] Losartan  
Ta+Nt Ta\*+Nt

Chemical structures S2. Non-target chemicals. Datasets: Ta+Nt = target and non-target chemicals, Ta\*+Nt = target -> endpoint outliers removed and non-target chemicals, Pe = PEGs, Pg = PPGs, Pe+Pg = PEGs and PPGs. Red: training set, blue: test set.

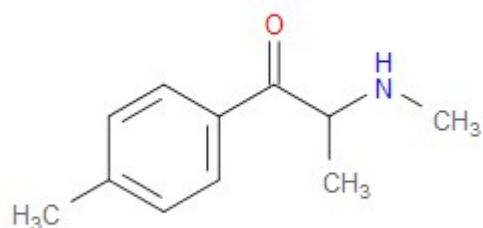

[ID 116] Mephedrone

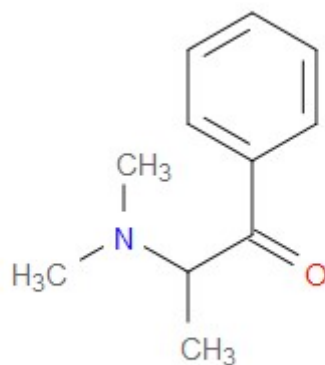

[ID 117] Metamfepramone

Ta+Nt

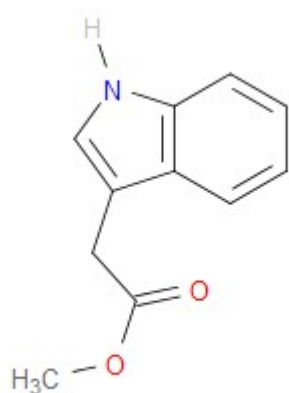

[ID 118] Methyl indole-3-acetate

Ta+Nt Ta\*+Nt

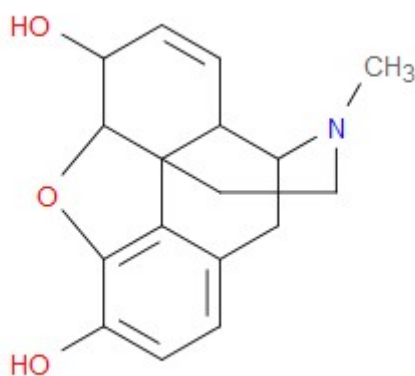

[ID 119] Morphine

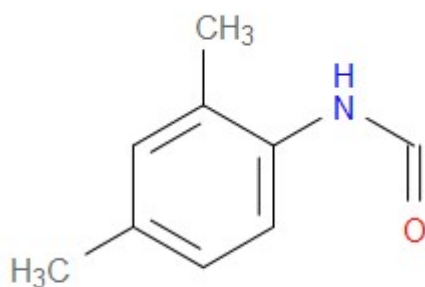

[ID 120] N-(2,4-Dimethylphenyl)  
formamide

Ta+Nt

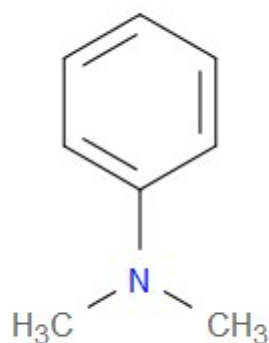

[ID 121] N,N-Dimethylaniline

Ta+Nt

Chemical structures S2. Non-target chemicals. Datasets: Ta+Nt = target and non-target chemicals, Ta\*+Nt = target -> endpoint outliers removed and non-target chemicals, Pe = PEGs, Pg = PPGs, Pe+Pg = PEGs and PPGs. Red: training set, blue: test set.

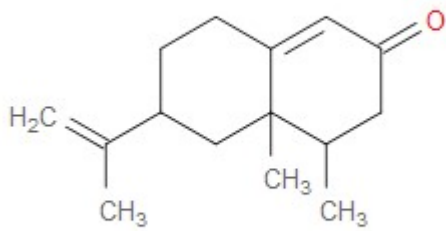

[ID 122] Nootkatone

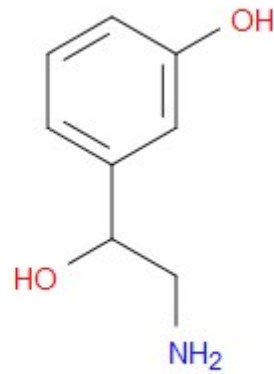

[ID 123] Norfenefrine

Ta+Nt

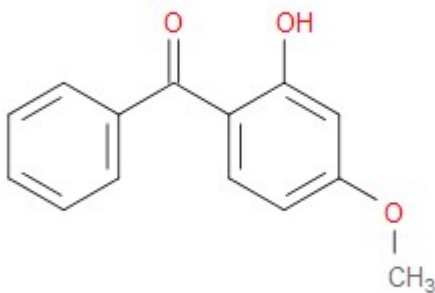

[ID 124] Oxybenzone

Ta+Nt Ta\*+Nt

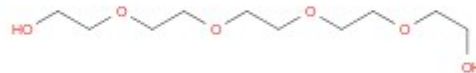

[ID 126] PEG n5

Pe Pe+Pg

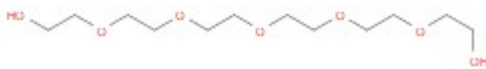

[ID 127] PEG n6

Pe Pe+Pg

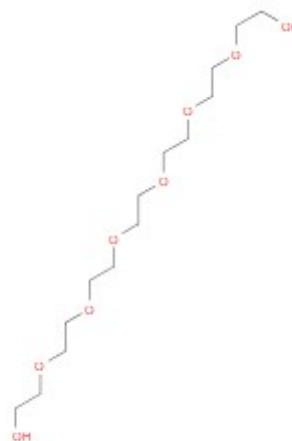

[ID 128] PEG n7

Pe Pe+Pg

Chemical structures S2. Non-target chemicals. Datasets: Ta+Nt = target and non-target chemicals, Ta\*+Nt = target -> endpoint outliers removed and non-target chemicals, Pe = PEGs, Pg = PPGs, Pe+Pg = PEGs and PPGs. Red: training set, blue: test set.

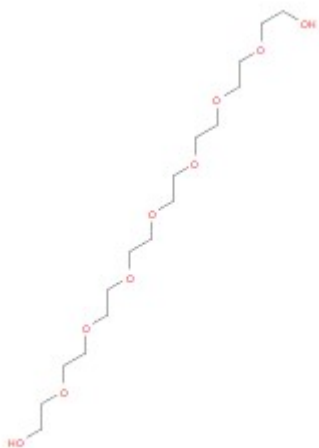

[ID 129] PEG n8

Pe Pe+Pg

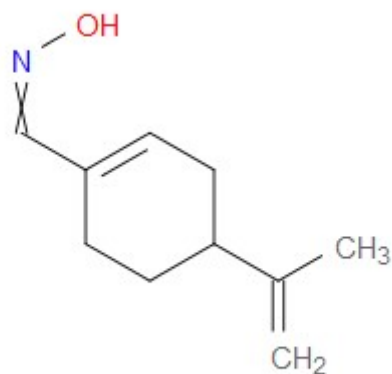

[ID 130] Perillartine

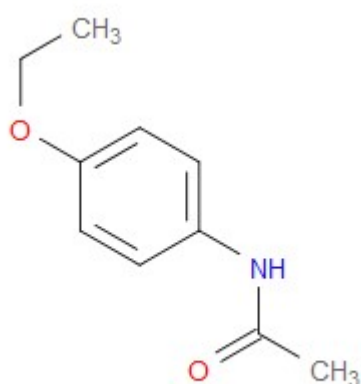

[ID 131] Phenacetin

Ta+Nt Ta\*+Nt

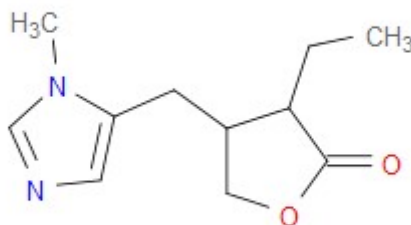

[ID 132] Pilocarpine

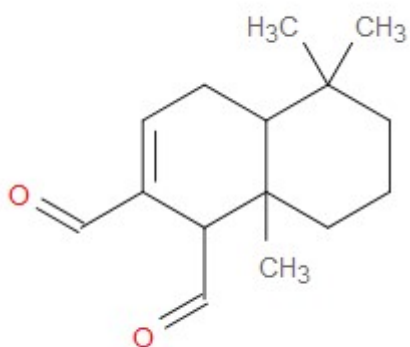

[ID 133] Polygodial

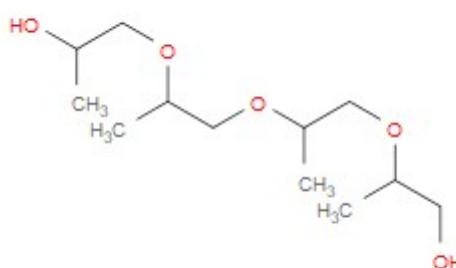

[ID 134] PPG n4

Pg Pe+Pg

Chemical structures S2. Non-target chemicals. Datasets: Ta+Nt = target and non-target chemicals, Ta\*+Nt = target -> endpoint outliers removed and non-target chemicals, Pe = PEGs, Pg = PPGs, Pe+Pg = PEGs and PPGs. Red: training set, blue: test set.

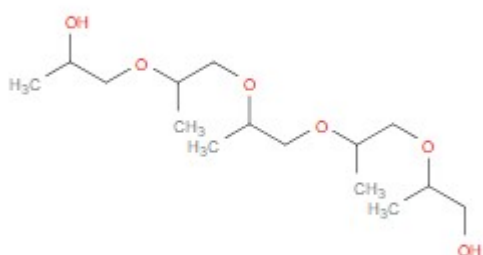

[ID 135] PPG n5

Pg Pe+Pg

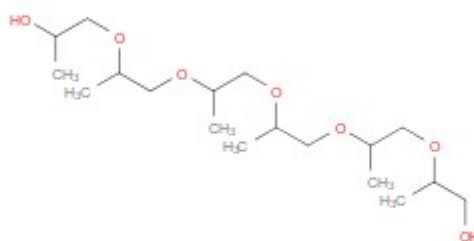

[ID 136] PPG n6

Pg Pe+Pg

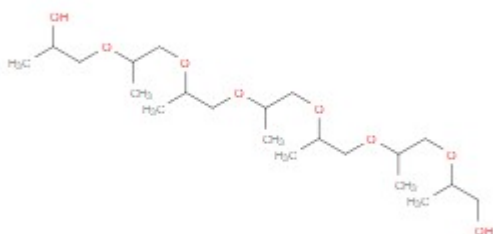

[ID 137] PPG n7

Pg Pe+Pg

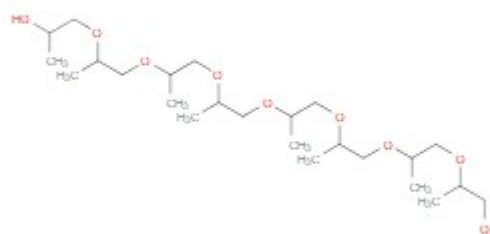

[ID 138] PPG n8

Pg Pe+Pg

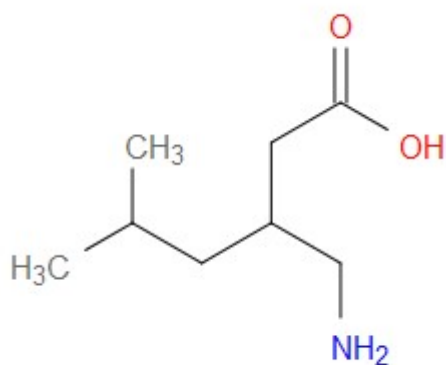

[ID 139] Pregabalin

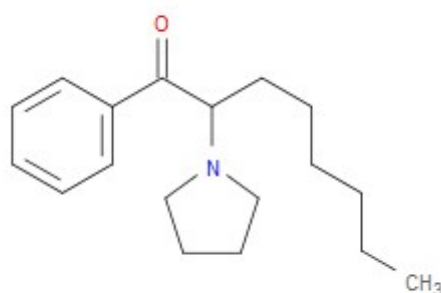

[ID 140] PV9

Ta+Nt Ta\*+Nt

Chemical structures S2. Non-target chemicals. Datasets: Ta+Nt = target and non-target chemicals, Ta\*+Nt = target -> endpoint outliers removed and non-target chemicals, Pe = PEGs, Pg = PPGs, Pe+Pg = PEGs and PPGs. Red: training set, blue: test set.

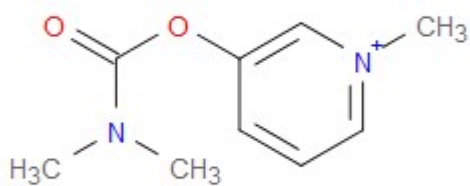

[ID 141] Pyridostigmine

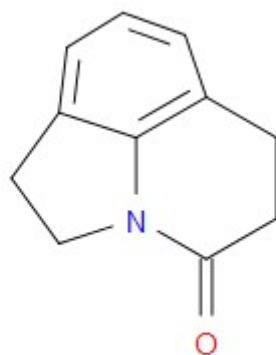

[ID 142] Pyroquilon

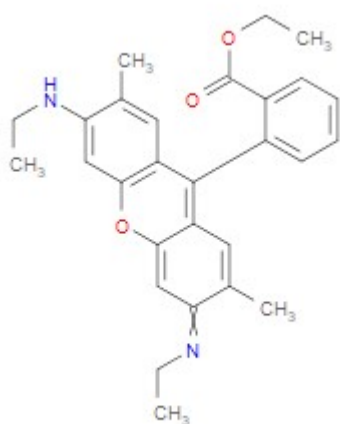

[ID 143] Rhodamine 6G

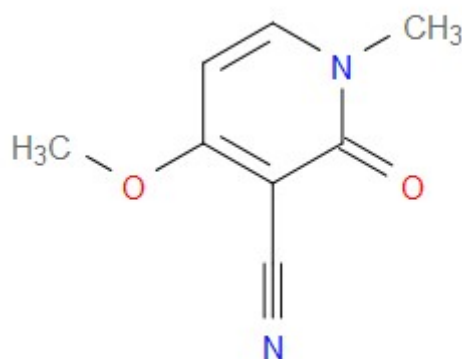

[ID 144] Ricinine

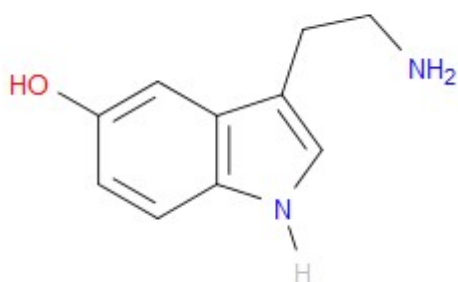

[ID 145] Serotonin

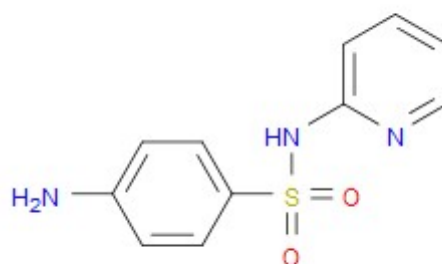

[ID 146] Sulfapyridine  
Ta+Nt Ta\*+Nt

Chemical structures S2. Non-target chemicals. Datasets: Ta+Nt = target and non-target chemicals, Ta\*+Nt = target -> endpoint outliers removed and non-target chemicals, Pe = PEGs, Pg = PPGs, Pe+Pg = PEGs and PPGs. Red: training set, blue: test set.



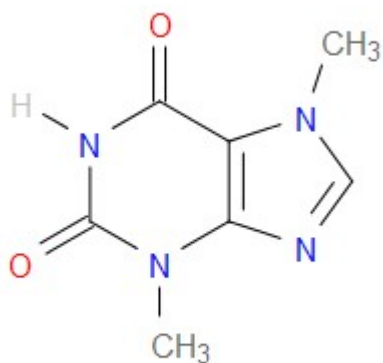

[ID 147] Theobromine

Ta+Nt Ta\*+Nt

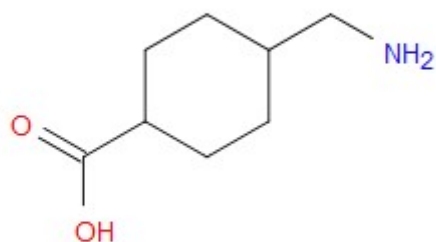

[ID 148] Tranexamic acid

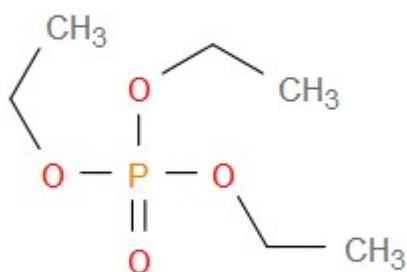

[ID 149] Triethyl phosphate

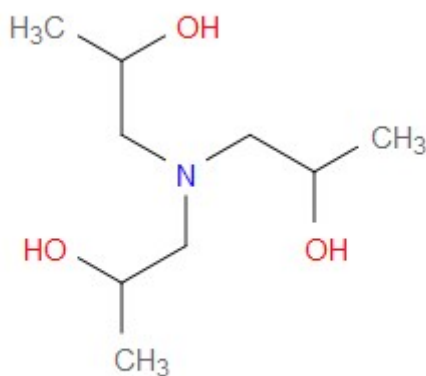

[ID 150] Triisopropanolamine

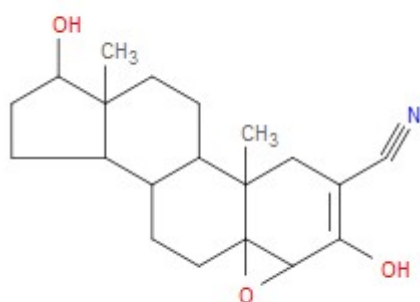

[ID 151] Trilostane

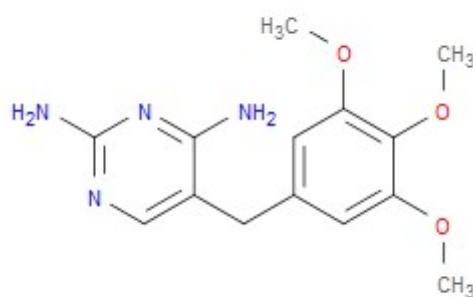

[ID 152] Trimethoprim

Chemical structures S2. Non-target chemicals. Datasets: Ta+Nt = target and non-target chemicals, Ta\*+Nt = target -> endpoint outliers removed and non-target chemicals, Pe = PEGs, Pg = PPGs, Pe+Pg = PEGs and PPGs. Red: training set, blue: test set.

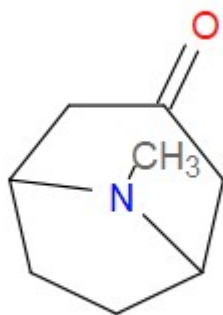

[ID 153] Tropinone

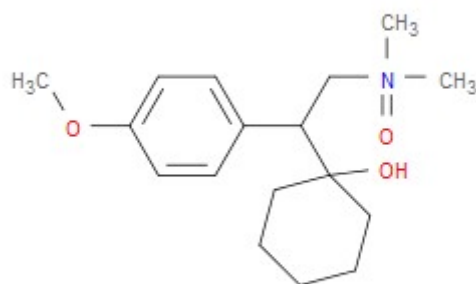

[ID 154] Venlafaxine N-Oxide  
**Ta+Nt Ta\*+Nt**

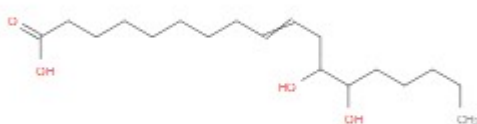

[ID 155] (+/-)-12(13)-DiHOME

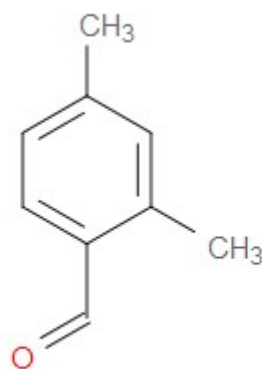

[ID 156] 2,4-Dimethylbenzaldehyde

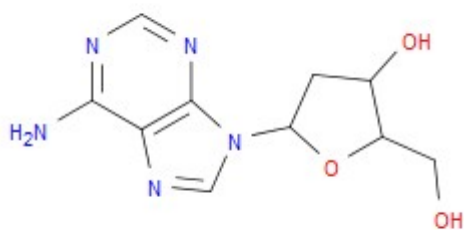

[ID 157] 2'-Deoxyadenosine

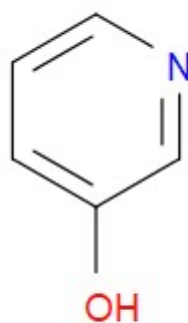

[ID 158] 3-Hydroxypyridine  
**Ta+Nt**

Chemical structures S2. Non-target chemicals. Datasets: Ta+Nt = target and non-target chemicals, Ta\*+Nt = target -> endpoint outliers removed and non-target chemicals, Pe = PEGs, Pg = PPGs, Pe+Pg = PEGs and PPGs. Red: training set, blue: test set.

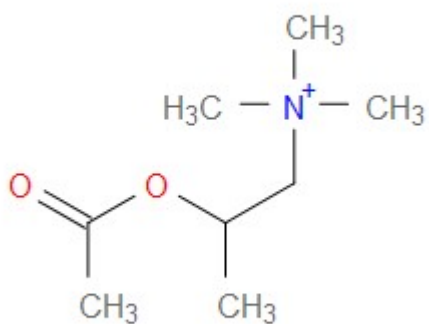

[ID 159] Acetyl-β-methylcholine

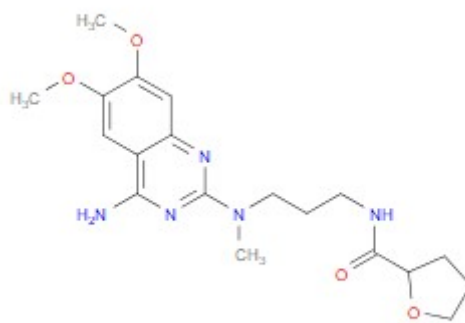

[ID 160] Alfuzosin

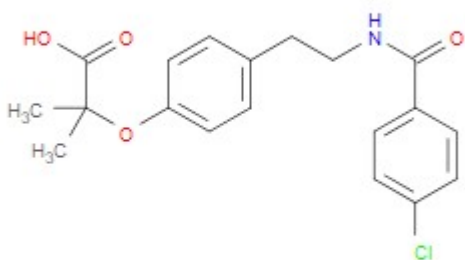

[ID 161] Bezafibrate  
Ta+Nt Ta\*+Nt

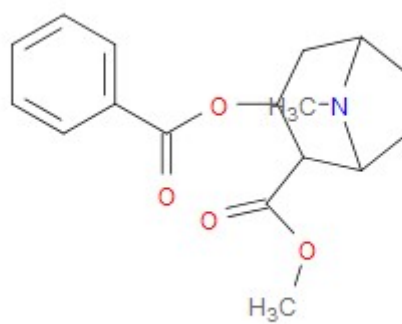

[ID 162] Cocaine

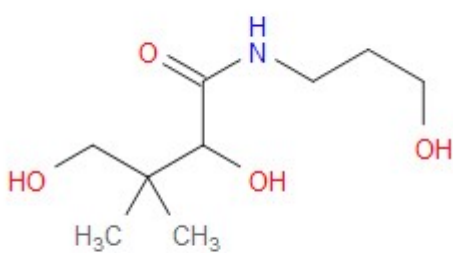

[ID 163] D-Panthenol

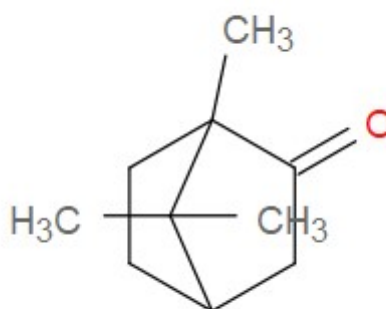

[ID 164] D,L-Camphor

Chemical structures S2. Non-target chemicals. Datasets: Ta+Nt = target and non-target chemicals, Ta\*+Nt = target -> endpoint outliers removed and non-target chemicals, Pe = PEGs, Pg = PPGs, Pe+Pg = PEGs and PPGs. Red: training set, blue: test set.

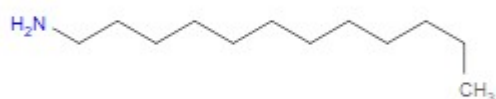

[ID 165] Dodecylamine

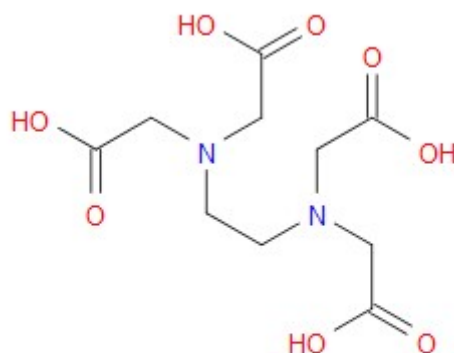

[ID 166]  
Ethylenediaminetetraacetic acid  
(EDTA)

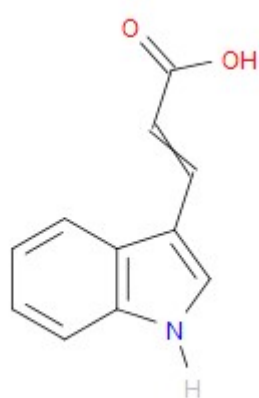

[ID 167] Indole-3-acrylic acid  
Ta+Nt Ta\*+Nt

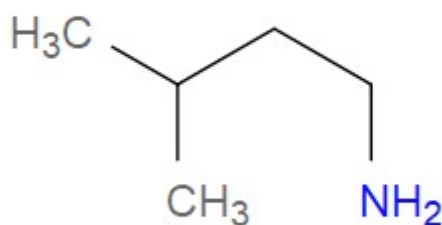

[ID 168] Isoamylamine

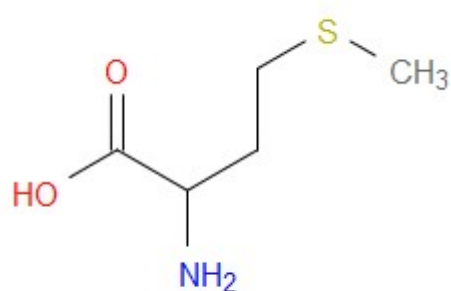

[ID 169] Methionine

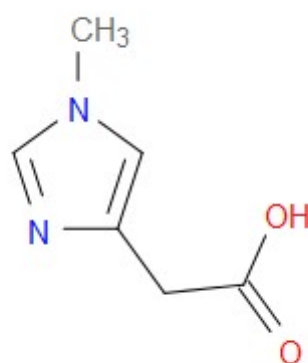

[ID 170] Methylimidazoleacetic acid

Chemical structures S2. Non-target chemicals. Datasets: Ta+Nt = target and non-target chemicals, Ta\*+Nt = target -> endpoint outliers removed and non-target chemicals, Pe = PEGs, Pg = PPGs, Pe+Pg = PEGs and PPGs. Red: training set, blue: test set.

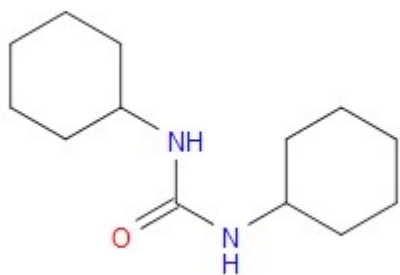

[ID 171] N,N'-Dicyclohexylurea

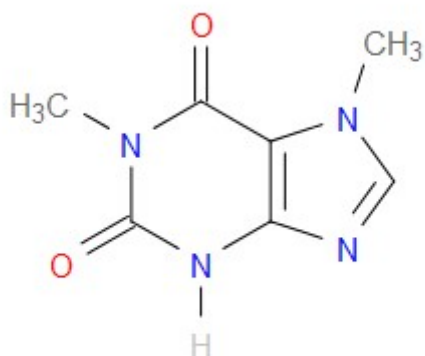

[ID 172] Paraxanthine

Ta+Nt Ta\*+Nt

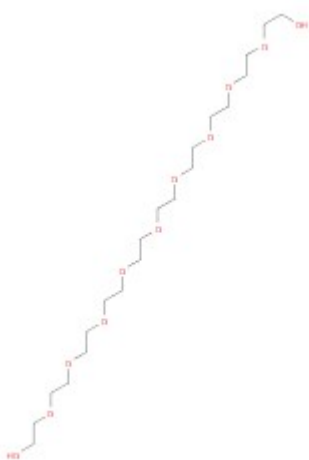

[ID 173] PEG n10

Pe Pe+Pg

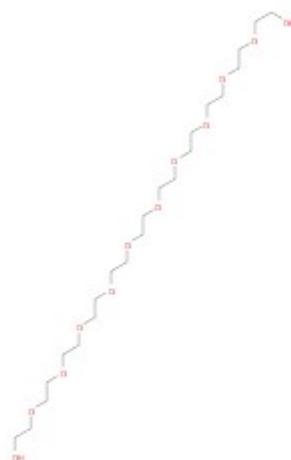

[ID 174] PEG n11

Pe Pe+Pg

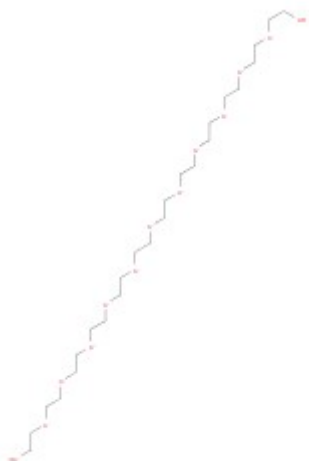

[ID 175] PEG n12

Pe Pe+Pg

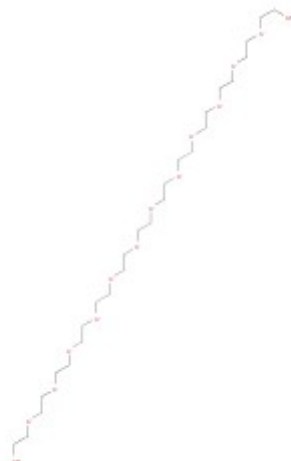

[ID 176] PEG n13

Pe Pe+Pg

Chemical structures S2. Non-target chemicals. Datasets: Ta+Nt = target and non-target chemicals, Ta\*+Nt = target -> endpoint outliers removed and non-target chemicals, Pe = PEGs, Pg = PPGs, Pe+Pg = PEGs and PPGs. Red: training set, blue: test set.

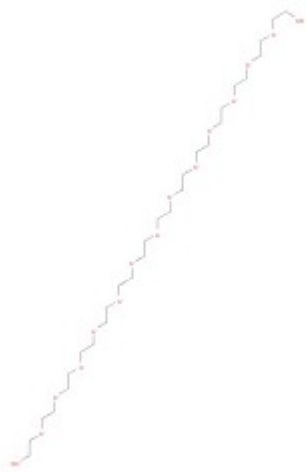

[ID 177] PEG n14

Pe Pe+Pg

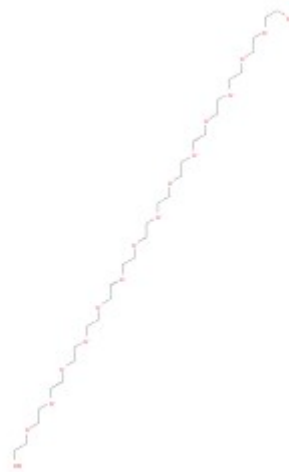

[ID 178] PEG n15

Pe Pe+Pg

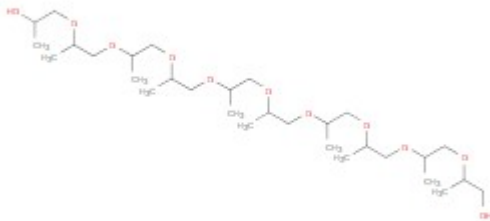

[ID 179] PPG n10

Pg Pe+Pg

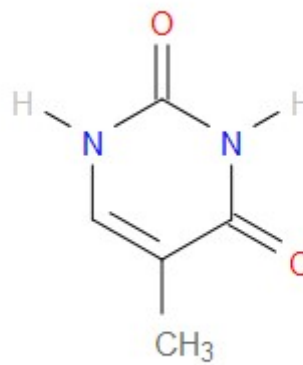

[ID 180] Thymine

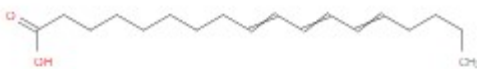

[ID 181]  $\alpha$ -Eleostearic acid

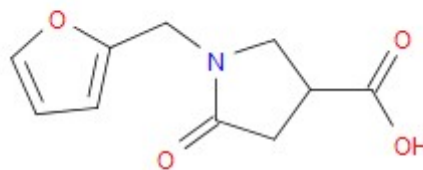

[ID 183] 1-(2-Furylmethyl)-5-oxopyrrolidine-3-carboxylic acid

Chemical structures S2. Non-target chemicals. Datasets: Ta+Nt = target and non-target chemicals, Ta\*+Nt = target -> endpoint outliers removed and non-target chemicals, Pe = PEGs, Pg = PPGs, Pe+Pg = PEGs and PPGs. Red: training set, blue: test set.

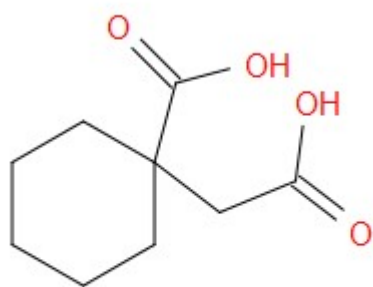

[ID 184] 1-(Carboxymethyl)  
cyclohexanecarboxylic acid

Ta+Nt Ta\*+Nt

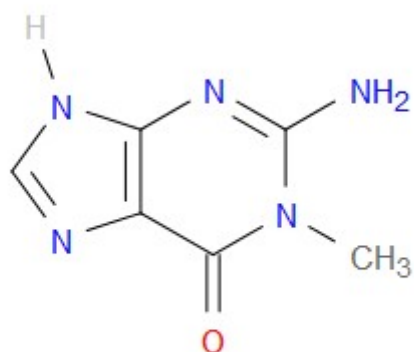

[ID 185] 1-Methylguanine

Ta+Nt Ta\*+Nt

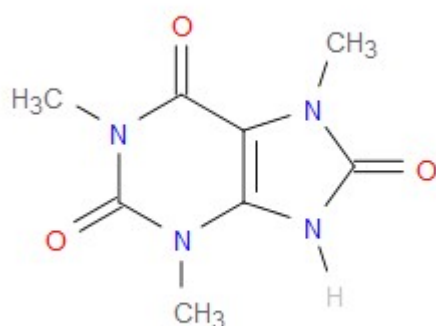

[ID 186] 1,3,7-Trimethyluric acid

Ta+Nt Ta\*+Nt

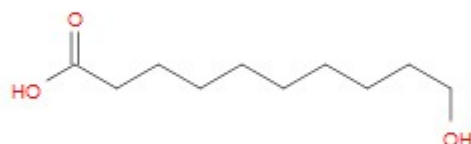

[ID 188] 10-Hydroxydecanoic acid

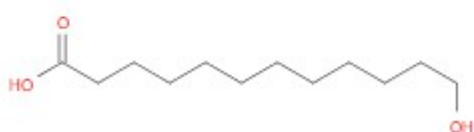

[ID 189] 12-Hydroxydodecanoic  
acid

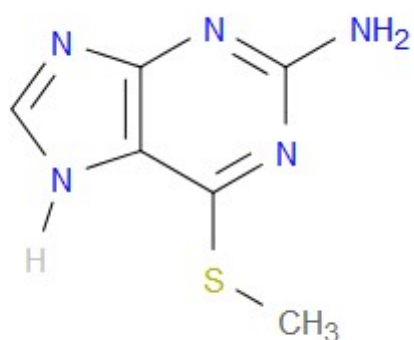

[ID 190] 2-Amino-6-  
methylmercaptapurine

Chemical structures S2. Non-target chemicals. Datasets: Ta+Nt = target and non-target chemicals, Ta\*+Nt = target -> endpoint outliers removed and non-target chemicals, Pe = PEGs, Pg = PPGs, Pe+Pg = PEGs and PPGs. Red: training set, blue: test set.

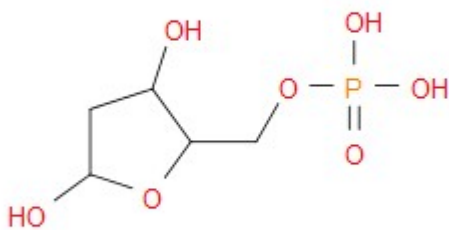

[ID 191] 2-Deoxyribose 5-phosphate

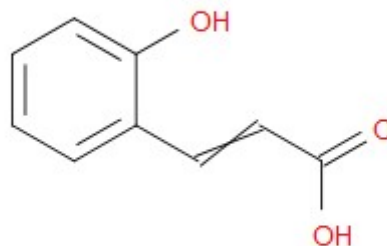

[ID 192] 2-Hydroxycinnamic acid

Ta+Nt

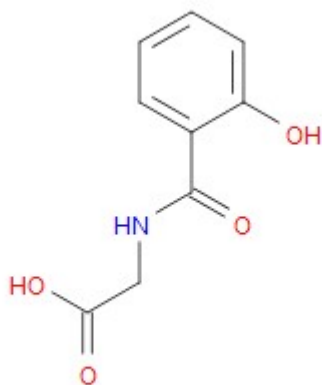

[ID 193] 2-Hydroxyhippuric acid

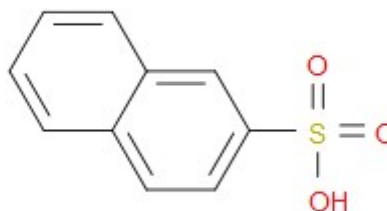

[ID 194] 2-Naphthalenesulfonic acid

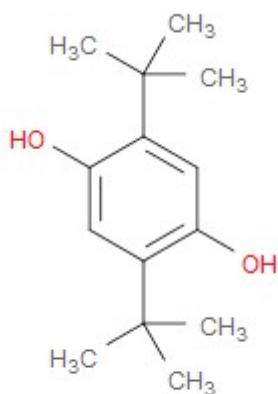

[ID 195] 2,5-di-tert-Butylhydroquinone

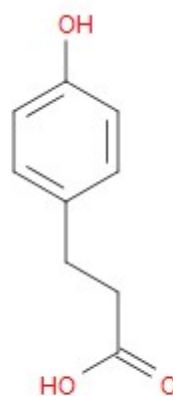

[ID 196] 3-(4-Hydroxyphenyl)propionic acid

Ta+Nt

Chemical structures S2. Non-target chemicals. Datasets: Ta+Nt = target and non-target chemicals, Ta\*+Nt = target -> endpoint outliers removed and non-target chemicals, Pe = PEGs, Pg = PPGs, Pe+Pg = PEGs and PPGs. Red: training set, blue: test set.



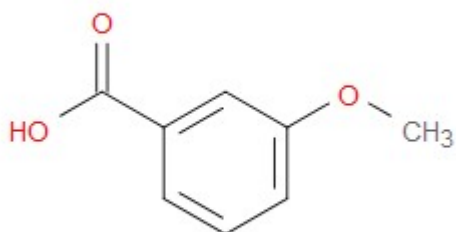

[ID 197] 3-Anisic acid

Ta+Nt

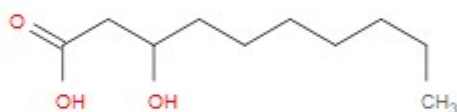

[ID 198] 3-Hydroxydecanoic acid

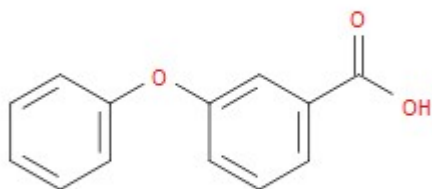

[ID 199] 3-Phenoxybenzoic acid

Ta+Nt Ta\*+Nt

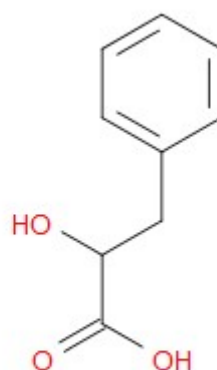

[ID 200] 3-Phenyllactic acid

Ta+Nt

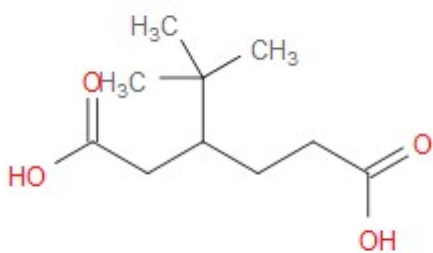

[ID 201] 3-tert-Butyladipic acid

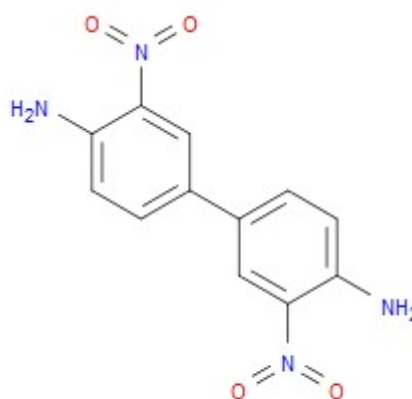

[ID 202] 3,3'-Dinitro(1,1'-biphenyl)-4,4'-diamine

Chemical structures S2. Non-target chemicals. Datasets: Ta+Nt = target and non-target chemicals, Ta\*+Nt = target -> endpoint outliers removed and non-target chemicals, Pe = PEGs, Pg = PPGs, Pe+Pg = PEGs and PPGs. Red: training set, blue: test set.

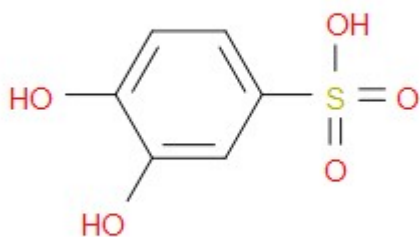

[ID 203] 3,4-Dihydroxybenzenesulfonic acid

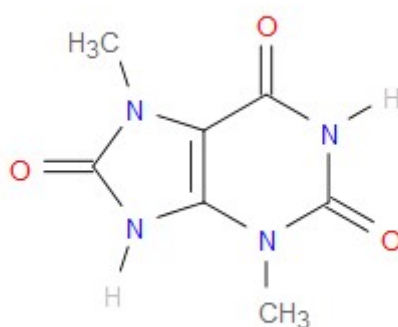

[ID 204] 3,7-Dimethyluric acid  
Ta+Nt Ta\*+Nt

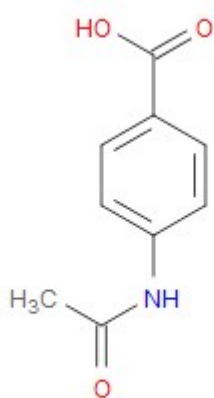

[ID 205] 4-Acetamidobenzoic acid  
Ta+Nt

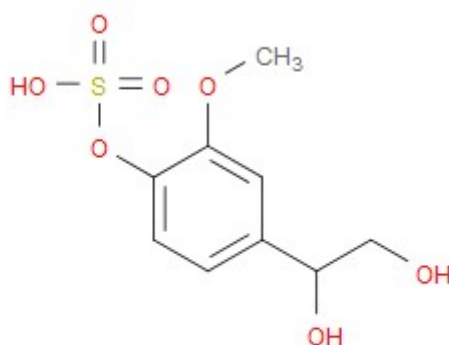

[ID 206] 4-Hydroxy-3-methoxyphenylglycol sulfate

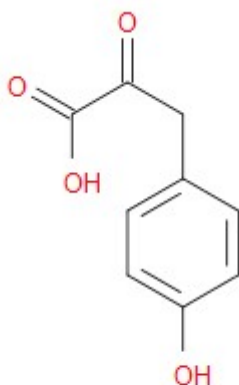

[ID 207] 4-Hydroxyphenylpyruvic acid  
Ta+Nt

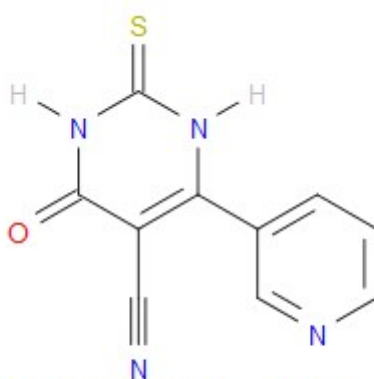

[ID 208] 4-Oxo-6-(3-pyridyl)-2-thioxo-1,2,3,4-tetrahydropyrimidine-5-carbonitrile  
Ta+Nt Ta\*+Nt

Chemical structures S2. Non-target chemicals. Datasets: Ta+Nt = target and non-target chemicals, Ta\*+Nt = target -> endpoint outliers removed and non-target chemicals, Pe = PEGs, Pg = PPGs, Pe+Pg = PEGs and PPGs. Red: training set, blue: test set.

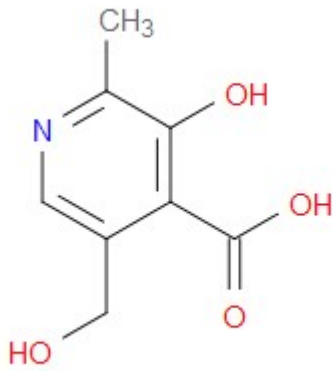

[ID 209] 4-Pyridoxic acid

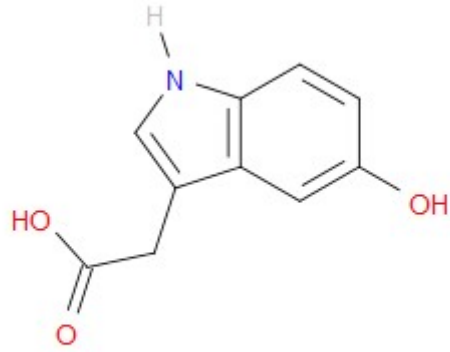

[ID 210] 5-Hydroxyindole-3-acetic acid  
Ta+Nt Ta\*+Nt

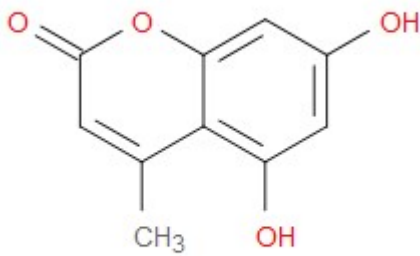

[ID 211] 5,7-Dihydroxy-4-methylcoumarin

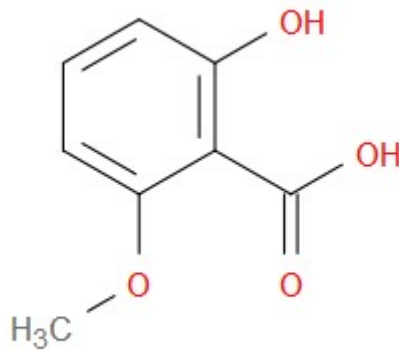

[ID 212] 6-Methoxysalicylic acid

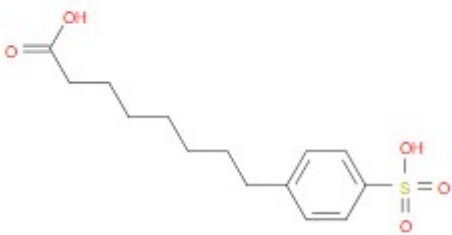

[ID 214] 8-(4-Sulphophenyl) octanoic acid

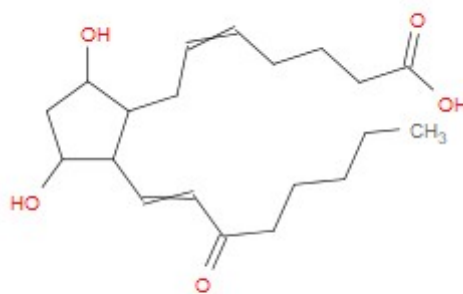

[ID 215] 8-Iso-15-keto-prostaglandin-F2β

Chemical structures S2. Non-target chemicals. Datasets: Ta+Nt = target and non-target chemicals, Ta\*+Nt = target -> endpoint outliers removed and non-target chemicals, Pe = PEGs, Pg = PPGs, Pe+Pg = PEGs and PPGs. Red: training set, blue: test set.

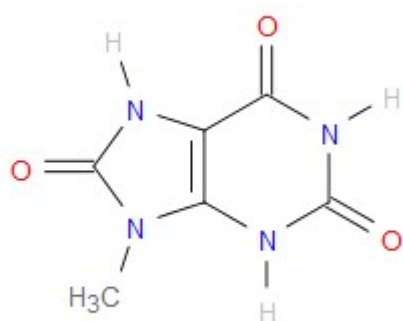

[ID 216] 9-Methyluric acid

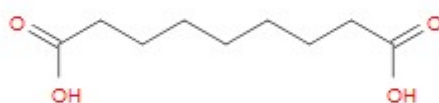

[ID 218] Azelaic acid

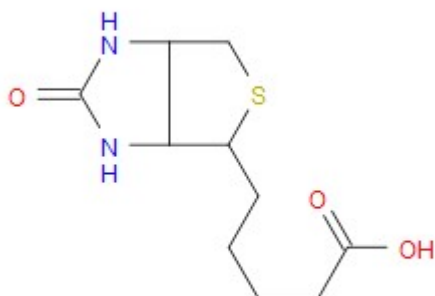

[ID 219] Biotin

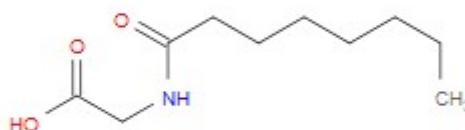

[ID 220] Capryloylglycine

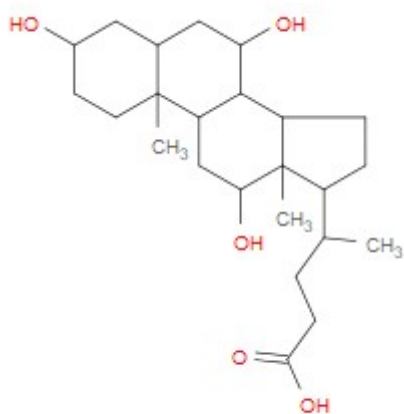

[ID 221] Cholic acid

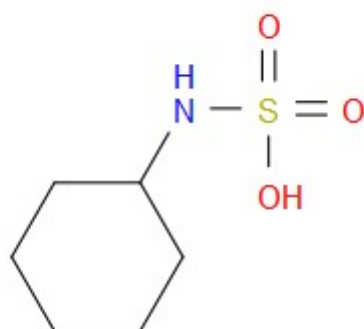

[ID 222] Cyclamic acid

Chemical structures S2. Non-target chemicals. Datasets: Ta+Nt = target and non-target chemicals, Ta\*+Nt = target -> endpoint outliers removed and non-target chemicals, Pe = PEGs, Pg = PPGs, Pe+Pg = PEGs and PPGs. Red: training set, blue: test set.

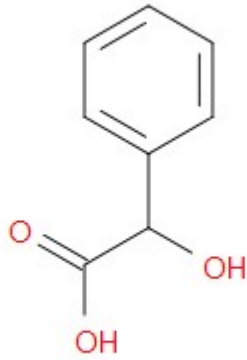

[ID 223] DL-Mandelic acid

Ta+Nt

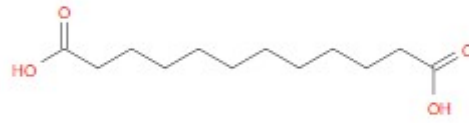

[ID 224] Dodecanedioic acid

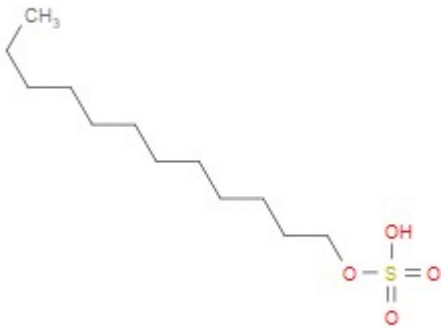

[ID 225] Dodecyl sulfate

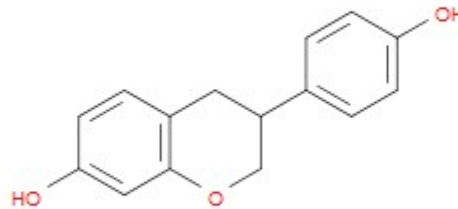

[ID 226] Equol

Ta+Nt Ta\*+Nt

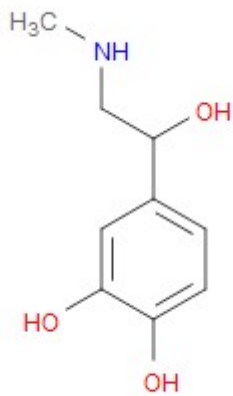

[ID 227] Epinephrine

Ta+Nt

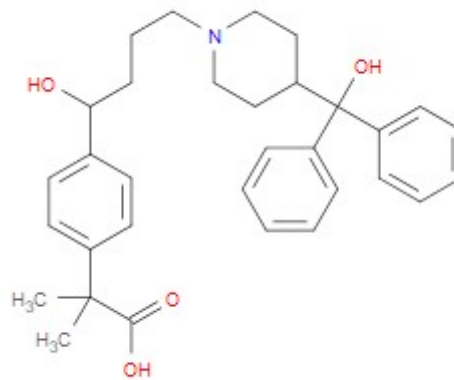

[ID 229] Fexofenadine

Ta+Nt Ta\*+Nt

Chemical structures S2. Non-target chemicals. Datasets: Ta+Nt = target and non-target chemicals, Ta\*+Nt = target -> endpoint outliers removed and non-target chemicals, Pe = PEGs, Pg = PPGs, Pe+Pg = PEGs and PPGs. Red: training set, blue: test set.

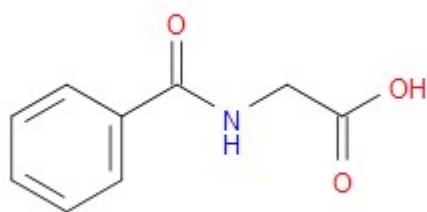

[ID 230] Hippuric acid

Ta+Nt

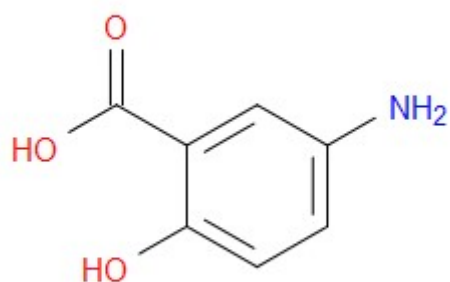

[ID 232] Mesalamine

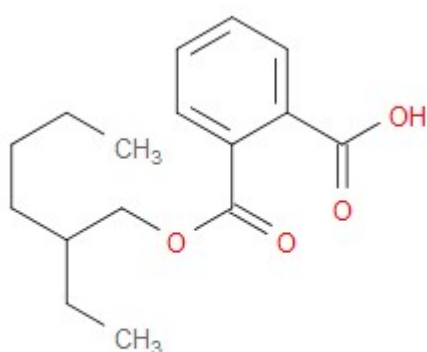

[ID 233] Mono(2-ethylhexyl)  
phthalate (MEHP)

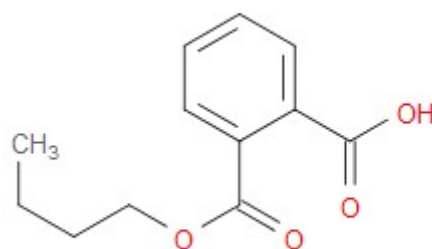

[ID 234] Monobutyl phthalate

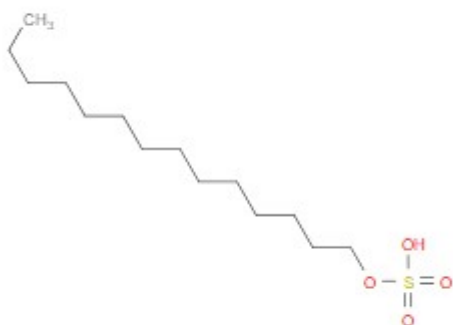

[ID 235] Myristyl sulfate

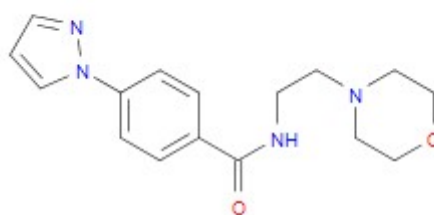

[ID 236] N-(2-Morpholinoethyl)-4-  
(1H-pyrazol-1-yl)benzamide

Ta+Nt Ta\*+Nt

Chemical structures S2. Non-target chemicals. Datasets: Ta+Nt = target and non-target chemicals, Ta\*+Nt = target -> endpoint outliers removed and non-target chemicals, Pe = PEGs, Pg = PPGs, Pe+Pg = PEGs and PPGs. Red: training set, blue: test set.

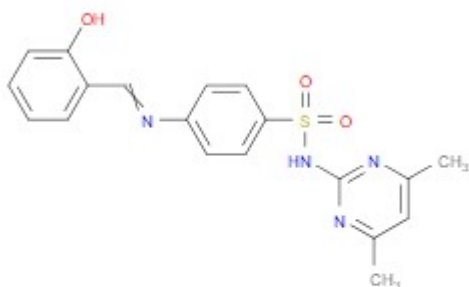

[ID 237] N-(4,6-Dimethyl-2-pyrimidinyl)-4-[(E)-(2-hydroxybenzylidene)amino] benzenesulfonamide

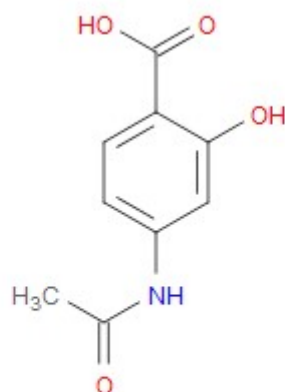

[ID 238] N-Acetyl-4-aminosalicylic acid

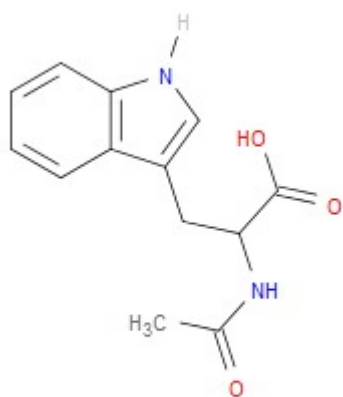

[ID 239] N-Acetyl-DL-tryptophan  
Ta+Nt Ta\*+Nt

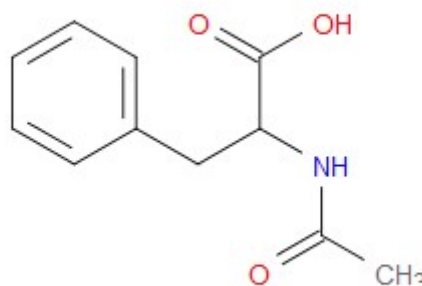

[ID 240] N-Acetyl-L-phenylalanine  
Ta+Nt Ta\*+Nt

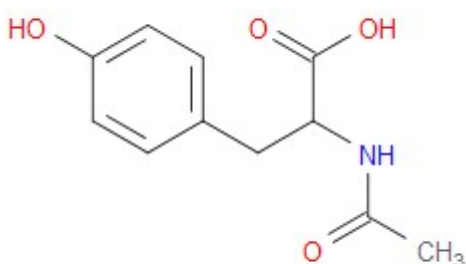

[ID 241] N-Acetyl-L-tyrosine  
Ta+Nt Ta\*+Nt

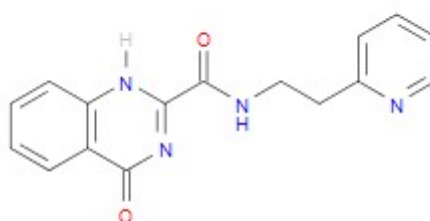

[ID 242] N2-[2-(2-Pyridyl)ethyl]-4-hydroxyquinazoline-2-carboxamide  
Ta+Nt Ta\*+Nt

Chemical structures S2. Non-target chemicals. Datasets: Ta+Nt = target and non-target chemicals, Ta\*+Nt = target -> endpoint outliers removed and non-target chemicals, Pe = PEGs, Pg = PPGs, Pe+Pg = PEGs and PPGs. Red: training set, blue: test set.

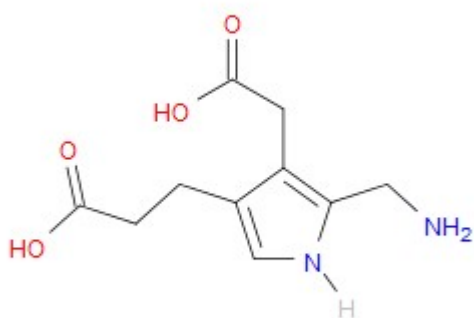

[ID 245] Porphobilinogen

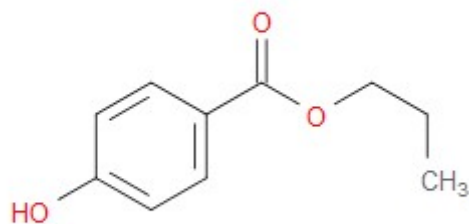

[ID 246] Propylparaben

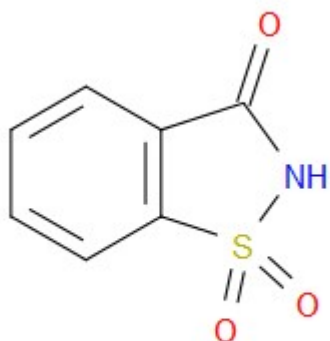

[ID 247] Saccharin

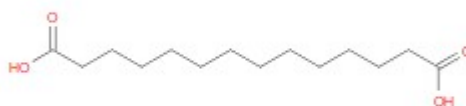

[ID 248] Tetradecanedioic acid

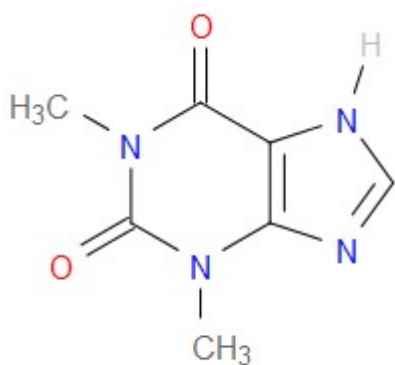

[ID 249] Theophylline

Ta+Nt Ta\*+Nt

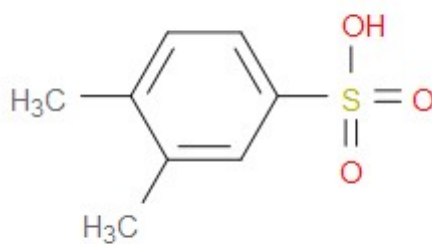

[ID 250] Xylenesulfonate

Chemical structures S2. Non-target chemicals. Datasets: Ta+Nt = target and non-target chemicals, Ta\*+Nt = target -> endpoint outliers removed and non-target chemicals, Pe = PEGs, Pg = PPGs, Pe+Pg = PEGs and PPGs. Red: training set, blue: test set.



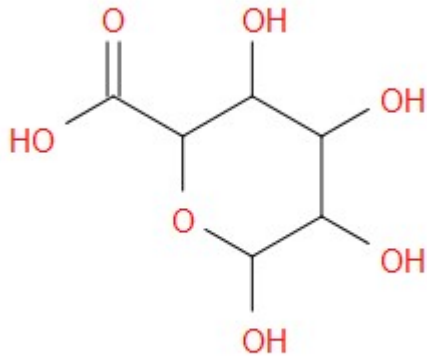

[ID 251]  $\beta$ -D-Glucopyranuronic acid

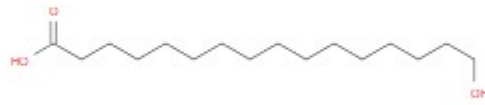

[ID 252] 16-Hydroxyhexadecanoic acid

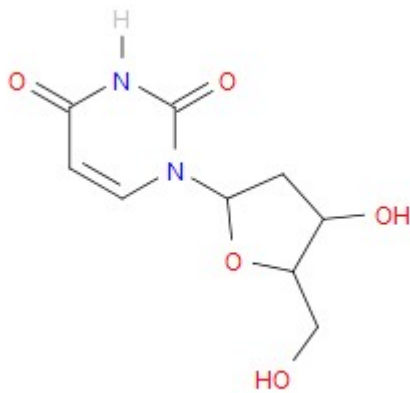

[ID 253] 2'-Deoxyuridine

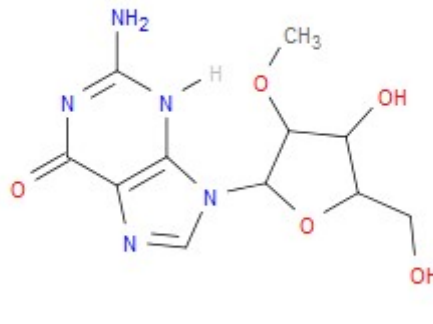

[ID 254] 2'-O-Methylguanosine

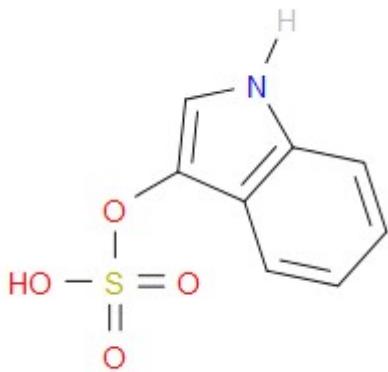

[ID 255] 3-Indoxyl sulphate  
Ta+Nt Ta\*+Nt

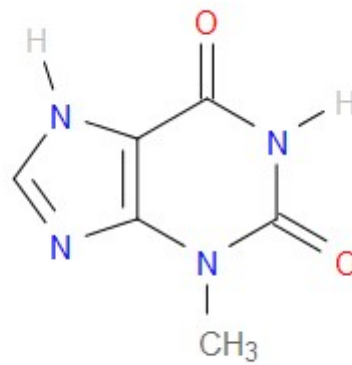

[ID 256] 3-Methylxanthine  
Ta+Nt Ta\*+Nt

Chemical structures S2. Non-target chemicals. Datasets: Ta+Nt = target and non-target chemicals, Ta\*+Nt = target -> endpoint outliers removed and non-target chemicals, Pe = PEGs, Pg = PPGs, Pe+Pg = PEGs and PPGs. Red: training set, blue: test set.

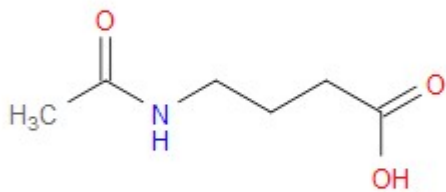

[ID 257] 4-Acetamidobutanoic acid

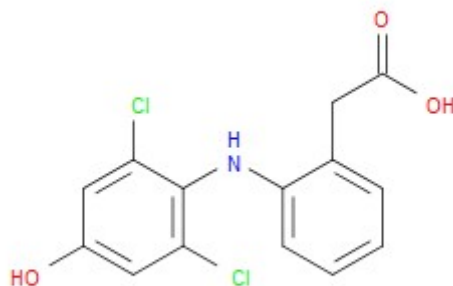

[ID 258] 4'-Hydroxydiclofenac  
Ta+Nt Ta\*+Nt

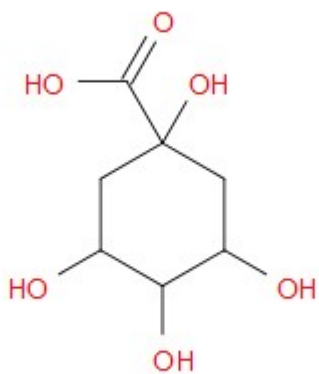

[ID 260] D-(-)-Quinic acid

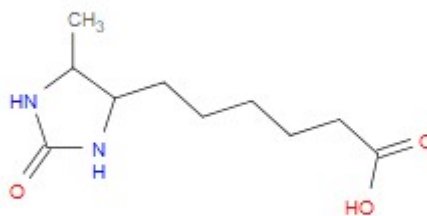

[ID 261] Desthiobiotin

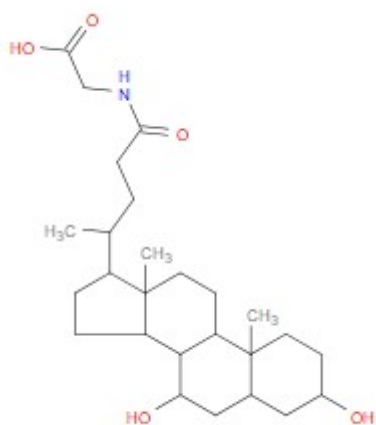

[ID 262] Glycoursodeoxycholic acid

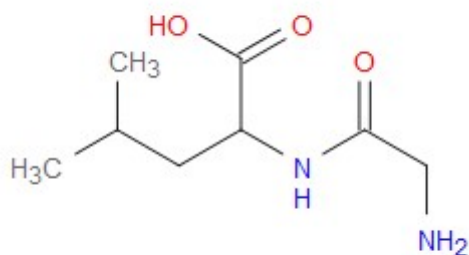

[ID 263] Glycyl-L-leucine

Chemical structures S2. Non-target chemicals. Datasets: Ta+Nt = target and non-target chemicals, Ta\*+Nt = target -> endpoint outliers removed and non-target chemicals, Pe = PEGs, Pg = PPGs, Pe+Pg = PEGs and PPGs. Red: training set, blue: test set.

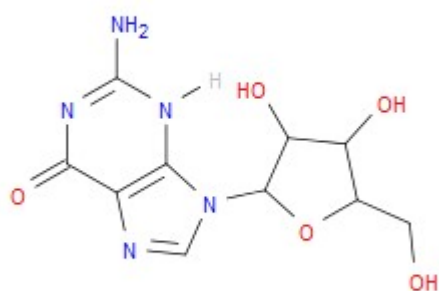

[ID 264] Guanosine

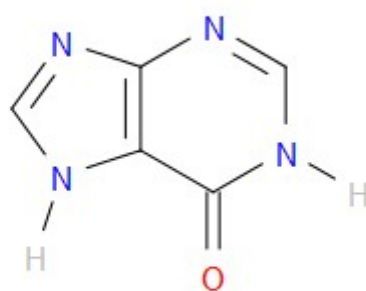

[ID 265] Hypoxanthine

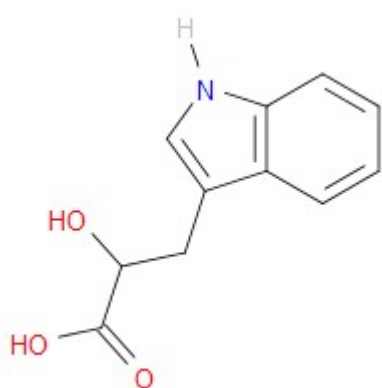

[ID 266] Indole-3-lactic acid

Ta+Nt Ta\*+Nt

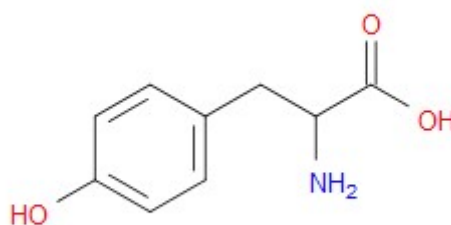

[ID 267] L-Tyrosine

Ta+Nt

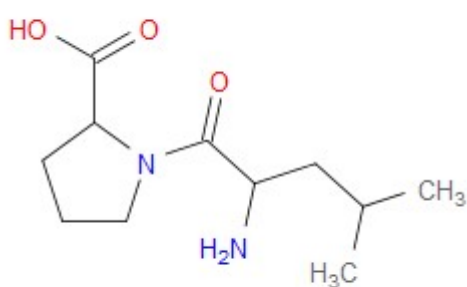

[ID 268] Leucylproline

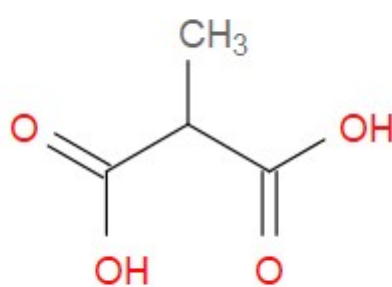

[ID 270] Methylmalonic acid

Chemical structures S2. Non-target chemicals. Datasets: Ta+Nt = target and non-target chemicals, Ta\*+Nt = target -> endpoint outliers removed and non-target chemicals, Pe = PEGs, Pg = PPGs, Pe+Pg = PEGs and PPGs. Red: training set, blue: test set.

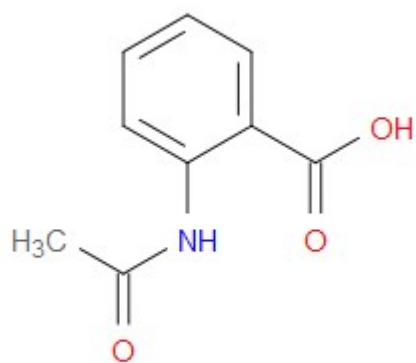

[ID 271] N-Acetyltryptophan

Ta+Nt

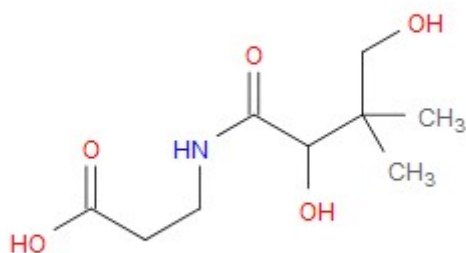

[ID 272] Pantoic acid

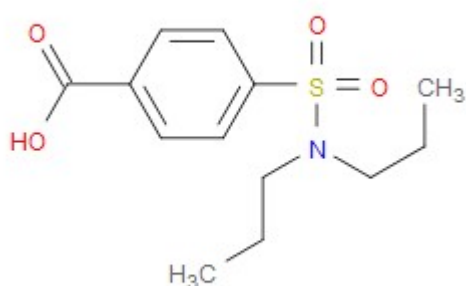

[ID 273] Probenecid

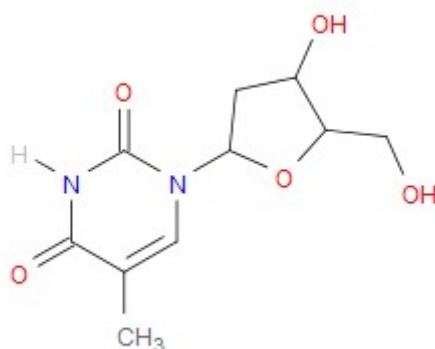

[ID 274] Thymidine

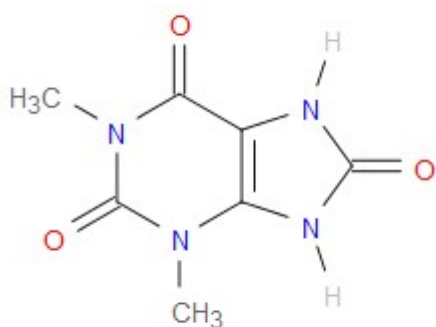

[ID 275] Uric acid

Ta+Nt Ta\*+Nt

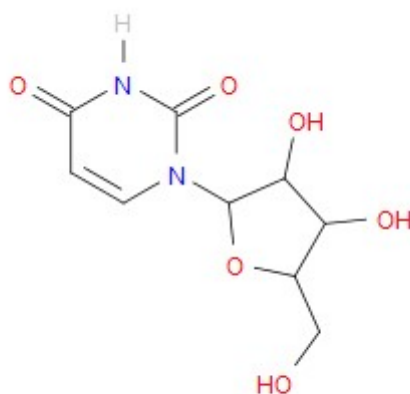

[ID 276] Uridine

Chemical structures S2. Non-target chemicals. Datasets: Ta+Nt = target and non-target chemicals, Ta\*+Nt = target -> endpoint outliers removed and non-target chemicals, Pe = PEGs, Pg = PPGs, Pe+Pg = PEGs and PPGs. Red: training set, blue: test set.
